# Supplementary material for: Identification of Significant Gene Signatures and Prognostic Biomarkers for Patients With Cervical Cancer by Integrated Bioinformatic Methods
Source: PubMed Central journal article supplement — Technol Cancer Res Treat. 2018 Apr 11;17:1533033818767455. doi: 10.1177/1533033818767455 (PMC5900817; doi:10.1177/1533033818767455), 2018-04-11

Supplementary table 1:

Clinical characteristics of patients with cervical squamous caner in TCGA

| Variable        | N    | %     |
|-----------------|------|-------|
| Total           | 254  |       |
| Age             | 48.9 | 20-88 |
| Vital Status    |      |       |
| Alive           | 193  | 76.0  |
| Dead            | 61   | 24.0  |
| Tumor Status    |      |       |
| Tumor Free      | 158  | 62.2  |
| With Tumor      | 63   | 24.8  |
| Not Available   | 33   | 13.0  |
| Grade           |      |       |
| G1              | 12   | 4.7   |
| G2              | 110  | 43.3  |
| G3              | 103  | 40.6  |
| G4              | 1    | 0.4   |
| Gx              | 20   | 7.9   |
| Not available   | 8    | 3.1   |
| T Stage         |      |       |
| T1              | 111  | 43.7  |
| T2              | 58   | 22.8  |
| T3              | 19   | 7.5   |
| T4              | 9    | 3.5   |
| Tis             | 1    | 0.4   |
| Tx              | 15   | 5.9   |
| Not Available   | 41   | 16.1  |
| N Stage         |      |       |
| N0              | 105  | 41.3  |
| N1              | 51   | 20.1  |
| Nx              | 57   | 22.4  |
| Not available   | 41   | 16.1  |
| M Stage         |      |       |
| M0              | 102  | 40.2  |
| M1              | 7    | 2.8   |
| Mx              | 99   | 39.0  |
| Not available   | 46   | 18.1  |
| HPV             |      |       |
| Positive        | 17   | 6.7   |
| Not application | 37   | 14.6  |
| Not available   | 200  | 78.7  |

Supplementary table 2:

Performance characteristics of the five genes in the different groups

| Group                        | MCM2   | MCM4   | MCM5   | PCNA   | RNASEH2A |             |
|------------------------------|--------|--------|--------|--------|----------|-------------|
| Cancer VS. normal (%)        | 99.5   | 99.5   | 99.5   | 99.5   | 99.5     | Sensitivity |
|                              | 100.00 | 100.00 | 100.00 | 100.00 | 100      | Specificity |
|                              | 0.996  | 0.996  | 0.996  | 0.996  | 0.996    | AUC         |
|                              | 100.00 | 100.00 | 100.00 | 100.00 | 100      | PPV         |
|                              | 75.282 | 75.282 | 75.282 | 75.282 | 75.282   | NPV         |
| Grade (G1 VS. G2/3) (%)      | 31.5   | 18.5   | 85.1   | 33.9   | 59.5     | Sensitivity |
|                              | 90.9   | 100    | 45.5   | 81.8   | 63.6     | Specificity |
|                              | 0.52   | 0.541  | 0.629  | 0.522  | 0.548    | AUC         |
|                              | 98.126 | 100    | 95.939 | 96.573 | 96.114   | PPV         |
|                              | 8.064  | 7.502  | 16.794 | 7.561  | 9.404    | NPV         |
| Stage (I-IIA VS. IIB-IV) (%) | 52.9   | 72.9   | 60     | 40     | 61.4     | Sensitivity |
|                              | 55.5   | 38.3   | 60.2   | 73.4   | 46.9     | Specificity |
|                              | 0.519  | 0.53   | 0.588  | 0.53   | 0.524    | AUC         |
|                              | 33.33  | 36.36  | 64.06  | 35.35  | 34.34    | PPV         |
|                              | 39.446 | 39.301 | 45.239 | 45.177 | 38.787   | NPV         |
| NO VS. N1 (%)                | 39.1   | 52.2   | 93.5   | 39.1   | 65.2     | Sensitivity |
|                              | 73.7   | 58.6   | 15.2   | 78.8   | 45.5     | Specificity |
|                              | 0.508  | 0.528  | 0.517  | 0.532  | 0.505    | AUC         |
|                              | 40.829 | 36.917 | 33.851 | 46.121 | 35.702   | PPV         |
|                              | 72.279 | 72.538 | 83.439 | 73.6   | 73.802   | NPV         |

Abbreviations: AUC: Area Under Curve; PPV: Positive Predictive Value; NPV: Negative Predictive Value.

Supplementary Table 3 Significant genes list obtained by univariate Cox regression analysis

| gene.name | exp(coef) | exp(-coef) | lower .95 | upper .95 | p-value  |
|-----------|-----------|------------|-----------|-----------|----------|
| PSMA8     | 0.2666    | 3.7512     | 0.1484    | 0.4788    | 2.11E-06 |
| ARHGAP4   | 0.2857    | 3.5007     | 0.1645    | 0.4961    | 2.35E-06 |
| BTNL8     | 0.2809    | 3.5604     | 0.1585    | 0.4976    | 3.44E-06 |

---

|              |        |        |        |        |          |
|--------------|--------|--------|--------|--------|----------|
| LAGE3        | 0.3145 | 3.1796 | 0.1821 | 0.5432 | 1.22E-05 |
| TREX1        | 0.3141 | 3.1836 | 0.1790 | 0.5512 | 2.05E-05 |
| PBX4         | 0.3209 | 3.1158 | 0.1845 | 0.5582 | 2.28E-05 |
| NCAPH2       | 0.3350 | 2.9849 | 0.1963 | 0.5717 | 2.67E-05 |
| TPRN         | 0.3404 | 2.9374 | 0.1962 | 0.5907 | 6.10E-05 |
| IL8          | 2.8308 | 0.3533 | 1.6612 | 4.8242 | 6.57E-05 |
| LGALS9       | 0.3518 | 2.8422 | 0.2054 | 0.6027 | 7.13E-05 |
| DPEP2        | 0.3581 | 2.7924 | 0.2108 | 0.6084 | 7.38E-05 |
| S1PR4        | 0.3506 | 2.8522 | 0.2038 | 0.6032 | 7.48E-05 |
| GTSF1L       | 0.3527 | 2.8354 | 0.2055 | 0.6054 | 8.04E-05 |
| LOC282997    | 0.3478 | 2.8748 | 0.2005 | 0.6036 | 8.53E-05 |
| MCM5         | 0.3599 | 2.7786 | 0.2112 | 0.6133 | 9.12E-05 |
| RBM38        | 0.3510 | 2.8493 | 0.2023 | 0.6089 | 9.77E-05 |
| ISY1         | 0.3662 | 2.7310 | 0.2164 | 0.6196 | 9.85E-05 |
| JAK3         | 0.3602 | 2.7761 | 0.2093 | 0.6198 | 0.000119 |
| MEI1         | 0.3657 | 2.7346 | 0.2140 | 0.6249 | 0.000131 |
| ISCU         | 0.3729 | 2.6814 | 0.2193 | 0.6343 | 0.000154 |
| C9orf84      | 0.3708 | 2.6969 | 0.2173 | 0.6326 | 0.000162 |
| FASN         | 2.7265 | 0.3668 | 1.5830 | 4.6961 | 0.000167 |
| NUBP1        | 0.3586 | 2.7885 | 0.2048 | 0.6278 | 0.000179 |
| SLC25A35     | 0.3806 | 2.6272 | 0.2252 | 0.6432 | 0.00018  |
| RCAN3        | 2.7469 | 0.3640 | 1.5817 | 4.7704 | 0.000184 |
| ARRB2        | 0.3795 | 2.6349 | 0.2241 | 0.6428 | 0.000184 |
| CD6          | 0.3781 | 2.6445 | 0.2223 | 0.6433 | 0.000195 |
| SLN          | 2.6634 | 0.3755 | 1.5566 | 4.5571 | 0.000204 |
| SSBP3        | 0.3804 | 2.6291 | 0.2237 | 0.6466 | 0.00021  |
| HNRNPA3P1    | 0.3787 | 2.6403 | 0.2223 | 0.6454 | 0.000213 |
| LOC644165    | 0.3691 | 2.7092 | 0.2126 | 0.6408 | 0.000225 |
| VMA21        | 0.3771 | 2.6515 | 0.2198 | 0.6472 | 0.000238 |
| BUB3         | 0.3836 | 2.6072 | 0.2246 | 0.6550 | 0.000267 |
| PARP6        | 0.3854 | 2.5949 | 0.2262 | 0.6566 | 0.000276 |
| LOC100188949 | 0.3846 | 2.6003 | 0.2251 | 0.6569 | 0.000281 |
| PTK2B        | 0.3839 | 2.6051 | 0.2244 | 0.6568 | 0.000286 |
| FAM129C      | 0.3879 | 2.5778 | 0.2282 | 0.6595 | 0.000288 |
| BDH1         | 0.3859 | 2.5914 | 0.2261 | 0.6586 | 0.000294 |
| LSP1         | 0.3897 | 2.5661 | 0.2294 | 0.6621 | 0.000303 |
| FBXO25       | 0.3783 | 2.6432 | 0.2187 | 0.6546 | 0.000311 |
| P2RY14       | 0.3818 | 2.6192 | 0.2217 | 0.6574 | 0.000312 |
| ANGPTL6      | 0.3950 | 2.5316 | 0.2340 | 0.6669 | 0.000315 |
| CSK          | 0.3894 | 2.5683 | 0.2279 | 0.6653 | 0.000345 |
| PRSS36       | 0.3854 | 2.5947 | 0.2240 | 0.6632 | 0.000352 |
| HHEX         | 0.3933 | 2.5424 | 0.2313 | 0.6687 | 0.000359 |
| ITGAD        | 0.3926 | 2.5474 | 0.2299 | 0.6704 | 0.000384 |
| RAD9B        | 0.3939 | 2.5390 | 0.2313 | 0.6706 | 0.000387 |

---

---

|           |        |        |        |        |          |
|-----------|--------|--------|--------|--------|----------|
| P2RY8     | 0.3928 | 2.5460 | 0.2299 | 0.6710 | 0.000392 |
| AKNA      | 0.3957 | 2.5269 | 0.2316 | 0.6762 | 0.000443 |
| TNFRSF13C | 0.4045 | 2.4721 | 0.2400 | 0.6819 | 0.000452 |
| POP5      | 0.4005 | 2.4969 | 0.2356 | 0.6808 | 0.00047  |
| TTC24     | 0.3970 | 2.5186 | 0.2323 | 0.6788 | 0.000474 |
| CD27      | 0.4017 | 2.4893 | 0.2365 | 0.6822 | 0.000479 |
| HNRNPA3   | 0.3991 | 2.5058 | 0.2340 | 0.6806 | 0.000492 |
| RPA2      | 0.4049 | 2.4694 | 0.2390 | 0.6862 | 0.000518 |
| RIBC2     | 0.4053 | 2.4673 | 0.2390 | 0.6873 | 0.000551 |
| RAB8A     | 0.4067 | 2.4588 | 0.2401 | 0.6889 | 0.000562 |
| DDX26B    | 0.4055 | 2.4662 | 0.2386 | 0.6890 | 0.000576 |
| ITGA5     | 2.4444 | 0.4091 | 1.4436 | 4.1390 | 0.000596 |
| EGLN1     | 2.4466 | 0.4087 | 1.4413 | 4.1530 | 0.000618 |
| AGPAT4    | 2.4973 | 0.4004 | 1.4509 | 4.2982 | 0.000628 |
| KIF22     | 0.4009 | 2.4943 | 0.2330 | 0.6899 | 0.000635 |
| TAF1A     | 2.5266 | 0.3958 | 1.4562 | 4.3840 | 0.000637 |
| PSCA      | 0.4056 | 2.4656 | 0.2374 | 0.6929 | 0.000639 |
| LGALS9C   | 0.4065 | 2.4598 | 0.2384 | 0.6934 | 0.000645 |
| KLF1      | 0.4096 | 2.4414 | 0.2411 | 0.6958 | 0.000649 |
| SLC25A14  | 0.4081 | 2.4503 | 0.2398 | 0.6946 | 0.000651 |
| WWC2      | 2.4620 | 0.4062 | 1.4403 | 4.2086 | 0.000662 |
| INO80C    | 0.4072 | 2.4558 | 0.2386 | 0.6948 | 0.000675 |
| CD1E      | 0.4168 | 2.3995 | 0.2476 | 0.7016 | 0.000683 |
| VAC14     | 0.4159 | 2.4045 | 0.2463 | 0.7024 | 0.000704 |
| C3orf70   | 0.3972 | 2.5176 | 0.2283 | 0.6912 | 0.00072  |
| SPIB      | 0.4117 | 2.4287 | 0.2421 | 0.7003 | 0.000728 |
| KEL       | 0.4153 | 2.4080 | 0.2454 | 0.7027 | 0.000729 |
| CHCHD6    | 0.4196 | 2.3832 | 0.2495 | 0.7058 | 0.000736 |
| CCDC56    | 0.4101 | 2.4386 | 0.2396 | 0.7018 | 0.000785 |
| C6orf136  | 0.4195 | 2.3839 | 0.2488 | 0.7071 | 0.000788 |
| UNC45B    | 0.4129 | 2.4216 | 0.2425 | 0.7033 | 0.00079  |
| FAM50A    | 0.4115 | 2.4303 | 0.2407 | 0.7033 | 0.000798 |
| IDH3G     | 0.4149 | 2.4102 | 0.2441 | 0.7053 | 0.000798 |
| RFC2      | 0.4115 | 2.4302 | 0.2409 | 0.7028 | 0.000803 |
| SEMA3A    | 2.4551 | 0.4073 | 1.4260 | 4.2268 | 0.000808 |
| C8orf30A  | 2.3919 | 0.4181 | 1.4137 | 4.0469 | 0.000809 |
| C9orf142  | 0.3969 | 2.5197 | 0.2266 | 0.6950 | 0.00081  |
| AKR1A1    | 0.4198 | 2.3819 | 0.2485 | 0.7093 | 0.000822 |
| LATS2     | 2.4350 | 0.4107 | 1.4202 | 4.1749 | 0.00084  |
| CDH26     | 0.4191 | 2.3863 | 0.2474 | 0.7098 | 0.000859 |
| LILRA4    | 0.4210 | 2.3755 | 0.2490 | 0.7116 | 0.000871 |
| TSHR      | 0.4189 | 2.3869 | 0.2469 | 0.7110 | 0.000877 |
| CCR7      | 0.4192 | 2.3853 | 0.2469 | 0.7119 | 0.000904 |
| MAP4K1    | 0.4198 | 2.3820 | 0.2474 | 0.7124 | 0.000906 |

---

---

|          |        |        |        |        |          |
|----------|--------|--------|--------|--------|----------|
| NUP62CL  | 0.4204 | 2.3784 | 0.2482 | 0.7123 | 0.000907 |
| COQ4     | 0.4119 | 2.4279 | 0.2394 | 0.7087 | 0.000941 |
| MTCP1NB  | 0.4200 | 2.3810 | 0.2472 | 0.7137 | 0.000941 |
| C1orf59  | 0.4245 | 2.3558 | 0.2514 | 0.7168 | 0.000951 |
| SERPINA5 | 2.4065 | 0.4155 | 1.4055 | 4.1206 | 0.000962 |
| ASTE1    | 0.4291 | 2.3303 | 0.2559 | 0.7197 | 0.000965 |
| THOP1    | 0.4210 | 2.3755 | 0.2480 | 0.7146 | 0.000969 |
| KIAA0922 | 0.4216 | 2.3717 | 0.2487 | 0.7149 | 0.000977 |
| CHAF1A   | 0.4262 | 2.3463 | 0.2529 | 0.7183 | 0.000978 |
| TFEB     | 0.4268 | 2.3429 | 0.2532 | 0.7196 | 0.00101  |
| DCBLD1   | 2.3865 | 0.4190 | 1.3973 | 4.0760 | 0.001013 |
| VPS33A   | 0.4267 | 2.3435 | 0.2528 | 0.7204 | 0.001021 |
| ABHD10   | 0.4201 | 2.3802 | 0.2460 | 0.7175 | 0.001057 |
| STARD3NL | 2.3624 | 0.4233 | 1.3887 | 4.0186 | 0.001079 |
| IQCB1    | 0.4292 | 2.3297 | 0.2547 | 0.7235 | 0.001086 |
| CPE      | 2.3736 | 0.4213 | 1.3900 | 4.0531 | 0.001091 |
| RPL19P12 | 0.4281 | 2.3357 | 0.2532 | 0.7239 | 0.001119 |
| LSMD1    | 0.4215 | 2.3722 | 0.2466 | 0.7206 | 0.001132 |
| PCDHGA11 | 2.3472 | 0.4260 | 1.3833 | 3.9826 | 0.001138 |
| CXorf65  | 0.4280 | 2.3363 | 0.2530 | 0.7241 | 0.001138 |
| SLAMF1   | 0.4261 | 2.3471 | 0.2509 | 0.7234 | 0.00114  |
| EAF2     | 0.4284 | 2.3342 | 0.2533 | 0.7247 | 0.001159 |
| ZBTB48   | 0.4263 | 2.3456 | 0.2505 | 0.7255 | 0.001211 |
| LY9      | 0.4318 | 2.3158 | 0.2557 | 0.7291 | 0.001215 |
| SCAND3   | 2.3198 | 0.4311 | 1.3721 | 3.9220 | 0.001229 |
| POLL     | 0.4284 | 2.3340 | 0.2522 | 0.7278 | 0.001237 |
| SFRS5    | 0.4266 | 2.3440 | 0.2505 | 0.7267 | 0.001252 |
| SERPINA3 | 2.3391 | 0.4275 | 1.3753 | 3.9783 | 0.001264 |
| DYSFIP1  | 0.4277 | 2.3383 | 0.2513 | 0.7277 | 0.001282 |
| WDR34    | 0.4254 | 2.3507 | 0.2488 | 0.7273 | 0.001294 |
| CKB      | 0.4309 | 2.3208 | 0.2543 | 0.7301 | 0.001294 |
| CAMP     | 0.4297 | 2.3269 | 0.2530 | 0.7300 | 0.001302 |
| FARSA    | 0.4371 | 2.2877 | 0.2602 | 0.7343 | 0.001314 |
| INPP5K   | 0.4314 | 2.3182 | 0.2543 | 0.7318 | 0.00132  |
| ASCL4    | 0.4258 | 2.3486 | 0.2489 | 0.7284 | 0.001333 |
| SELL     | 0.4350 | 2.2990 | 0.2577 | 0.7342 | 0.001346 |
| MED26    | 0.4291 | 2.3304 | 0.2520 | 0.7308 | 0.001348 |
| CD5      | 0.4350 | 2.2988 | 0.2577 | 0.7344 | 0.001353 |
| TAZ      | 0.4365 | 2.2907 | 0.2590 | 0.7359 | 0.001383 |
| AMDHD2   | 0.4321 | 2.3144 | 0.2544 | 0.7340 | 0.001395 |
| GATS     | 0.4389 | 2.2785 | 0.2610 | 0.7381 | 0.001406 |
| THSD1    | 2.3131 | 0.4323 | 1.3627 | 3.9264 | 0.001416 |
| TIMM17B  | 0.4291 | 2.3303 | 0.2515 | 0.7323 | 0.001419 |
| MSRB3    | 2.3293 | 0.4293 | 1.3634 | 3.9796 | 0.001438 |

---

---

|            |        |        |        |        |          |
|------------|--------|--------|--------|--------|----------|
| MCM3       | 0.4373 | 2.2865 | 0.2591 | 0.7383 | 0.001464 |
| SBF1P1     | 0.4365 | 2.2907 | 0.2582 | 0.7381 | 0.001474 |
| TMEM180    | 0.4385 | 2.2806 | 0.2598 | 0.7401 | 0.001493 |
| TMED10P1   | 2.3223 | 0.4306 | 1.3593 | 3.9673 | 0.001494 |
| INPP5D     | 0.4335 | 2.3068 | 0.2548 | 0.7376 | 0.001531 |
| APOBEC3B   | 0.4454 | 2.2454 | 0.2665 | 0.7441 | 0.001532 |
| RAB2A      | 2.2890 | 0.4369 | 1.3525 | 3.8740 | 0.001545 |
| C16orf75   | 0.4388 | 2.2790 | 0.2597 | 0.7413 | 0.001559 |
| GINS2      | 0.4378 | 2.2843 | 0.2588 | 0.7406 | 0.001576 |
| CHAF1B     | 0.4345 | 2.3013 | 0.2554 | 0.7392 | 0.001582 |
| GMIP       | 0.4402 | 2.2718 | 0.2607 | 0.7432 | 0.001592 |
| BTLA       | 0.4365 | 2.2912 | 0.2571 | 0.7410 | 0.001594 |
| SNAI3      | 0.4411 | 2.2668 | 0.2614 | 0.7446 | 0.001631 |
| CORT       | 0.4286 | 2.3332 | 0.2490 | 0.7377 | 0.001631 |
| DEF6       | 0.4390 | 2.2777 | 0.2586 | 0.7453 | 0.001715 |
| KLHDC3     | 0.4342 | 2.3033 | 0.2538 | 0.7426 | 0.001726 |
| ERG        | 2.3224 | 0.4306 | 1.3494 | 3.9970 | 0.001732 |
| EXT1       | 2.3822 | 0.4198 | 1.3602 | 4.1721 | 0.001742 |
| HPS1       | 0.4395 | 2.2753 | 0.2588 | 0.7463 | 0.001742 |
| AGAP11     | 0.4334 | 2.3074 | 0.2530 | 0.7424 | 0.001767 |
| MAP3K14    | 0.4442 | 2.2514 | 0.2632 | 0.7496 | 0.001791 |
| THYN1      | 0.4267 | 2.3434 | 0.2460 | 0.7402 | 0.001799 |
| C6orf59    | 2.2699 | 0.4406 | 1.3369 | 3.8539 | 0.001808 |
| PTPRM      | 2.2441 | 0.4456 | 1.3323 | 3.7801 | 0.001815 |
| PLAC8      | 0.4471 | 2.2365 | 0.2659 | 0.7517 | 0.00182  |
| LCN10      | 0.4443 | 2.2509 | 0.2629 | 0.7508 | 0.001844 |
| FGD3       | 0.4453 | 2.2457 | 0.2638 | 0.7516 | 0.001861 |
| TIPIN      | 0.4373 | 2.2869 | 0.2561 | 0.7466 | 0.001865 |
| POM121L10P | 0.4343 | 2.3026 | 0.2526 | 0.7468 | 0.001898 |
| L3MBTL2    | 0.4478 | 2.2334 | 0.2659 | 0.7541 | 0.001929 |
| CIDECP     | 0.4390 | 2.2780 | 0.2569 | 0.7502 | 0.001966 |
| RFC5       | 0.4456 | 2.2439 | 0.2635 | 0.7538 | 0.001985 |
| GZMH       | 0.4358 | 2.2948 | 0.2534 | 0.7495 | 0.002019 |
| LOXL2      | 2.2336 | 0.4477 | 1.3227 | 3.7717 | 0.002022 |
| UBXN11     | 0.4410 | 2.2676 | 0.2583 | 0.7529 | 0.002036 |
| PLA2G2D    | 0.4553 | 2.1965 | 0.2726 | 0.7603 | 0.002048 |
| FITM1      | 0.4399 | 2.2735 | 0.2571 | 0.7526 | 0.002068 |
| SLC25A28   | 0.4451 | 2.2465 | 0.2622 | 0.7558 | 0.002075 |
| ACTR3      | 2.3214 | 0.4308 | 1.3365 | 4.0319 | 0.00209  |
| HESX1      | 0.4450 | 2.2471 | 0.2617 | 0.7567 | 0.00215  |
| DENND2D    | 0.4509 | 2.2176 | 0.2673 | 0.7609 | 0.002181 |
| PIN1L      | 0.4497 | 2.2239 | 0.2660 | 0.7601 | 0.002206 |
| HIST1H1D   | 0.4400 | 2.2729 | 0.2565 | 0.7547 | 0.002209 |
| SC4MOL     | 2.2789 | 0.4388 | 1.3247 | 3.9205 | 0.002213 |

---

---

|          |        |        |        |        |          |
|----------|--------|--------|--------|--------|----------|
| SHISA4   | 2.2450 | 0.4454 | 1.3185 | 3.8223 | 0.002229 |
| FAM83A   | 2.2235 | 0.4497 | 1.3154 | 3.7586 | 0.002232 |
| INPP5B   | 0.4544 | 2.2007 | 0.2704 | 0.7636 | 0.002245 |
| NDUFS7   | 0.4480 | 2.2321 | 0.2641 | 0.7601 | 0.002252 |
| SERINC3  | 2.2786 | 0.4389 | 1.3234 | 3.9234 | 0.002258 |
| OSBPL2   | 0.4516 | 2.2146 | 0.2675 | 0.7623 | 0.002273 |
| CYP4F12  | 0.4532 | 2.2066 | 0.2690 | 0.7636 | 0.002292 |
| NLRC3    | 0.4488 | 2.2282 | 0.2645 | 0.7615 | 0.002296 |
| PNPLA1   | 0.4534 | 2.2056 | 0.2691 | 0.7638 | 0.002309 |
| GPR114   | 0.4489 | 2.2274 | 0.2646 | 0.7618 | 0.002313 |
| CDK8     | 2.2240 | 0.4496 | 1.3124 | 3.7690 | 0.002314 |
| PLA1A    | 0.4526 | 2.2096 | 0.2681 | 0.7638 | 0.002318 |
| SLC25A19 | 0.4555 | 2.1953 | 0.2710 | 0.7658 | 0.002347 |
| SLC6A17  | 2.2160 | 0.4513 | 1.3096 | 3.7496 | 0.002363 |
| DUOX1    | 0.4527 | 2.2089 | 0.2682 | 0.7643 | 0.002363 |
| ARID3A   | 2.2428 | 0.4459 | 1.3136 | 3.8294 | 0.002371 |
| PDIA6    | 2.2334 | 0.4477 | 1.3123 | 3.8010 | 0.002379 |
| PTPRN    | 2.2022 | 0.4541 | 1.3061 | 3.7131 | 0.002383 |
| EREG     | 2.1897 | 0.4567 | 1.3034 | 3.6788 | 0.00239  |
| SYNGR2   | 0.4556 | 2.1951 | 0.2708 | 0.7665 | 0.002391 |
| C22orf43 | 0.4493 | 2.2259 | 0.2642 | 0.7639 | 0.002419 |
| ZC3H13   | 2.2499 | 0.4445 | 1.3129 | 3.8557 | 0.002439 |
| SLAMF6   | 0.4544 | 2.2007 | 0.2693 | 0.7668 | 0.002441 |
| NFATC3   | 0.4529 | 2.2080 | 0.2677 | 0.7662 | 0.00245  |
| GDAP1    | 2.1974 | 0.4551 | 1.3016 | 3.7097 | 0.002489 |
| SOX21    | 0.4444 | 2.2504 | 0.2592 | 0.7618 | 0.002497 |
| HELLS    | 0.4519 | 2.2129 | 0.2665 | 0.7661 | 0.002499 |
| SIT1     | 0.4581 | 2.1831 | 0.2726 | 0.7697 | 0.002507 |
| GOT1     | 0.4576 | 2.1854 | 0.2722 | 0.7693 | 0.002508 |
| FUNDC2   | 0.4588 | 2.1796 | 0.2734 | 0.7698 | 0.002508 |
| ARRDC2   | 0.4572 | 2.1874 | 0.2717 | 0.7692 | 0.002515 |
| GEFT     | 2.1936 | 0.4559 | 1.3007 | 3.6994 | 0.002551 |
| SS18L2   | 0.4507 | 2.2188 | 0.2650 | 0.7665 | 0.002552 |
| SULT1A3  | 0.4517 | 2.2139 | 0.2659 | 0.7674 | 0.002558 |
| EIF3H    | 2.1869 | 0.4573 | 1.2988 | 3.6824 | 0.002561 |
| IL18BP   | 0.4559 | 2.1935 | 0.2700 | 0.7698 | 0.002595 |
| C3orf67  | 2.1936 | 0.4559 | 1.2984 | 3.7061 | 0.002612 |
| ZDHHC20  | 2.2441 | 0.4456 | 1.3076 | 3.8515 | 0.002623 |
| PGP      | 0.4489 | 2.2279 | 0.2626 | 0.7674 | 0.002654 |
| MFSD3    | 2.1748 | 0.4598 | 1.2944 | 3.6541 | 0.002685 |
| FOXP3    | 0.4642 | 2.1542 | 0.2778 | 0.7756 | 0.002706 |
| SPRED3   | 2.2235 | 0.4497 | 1.3006 | 3.8013 | 0.002712 |
| SUV39H1  | 0.4587 | 2.1799 | 0.2721 | 0.7734 | 0.002742 |
| EPHX2    | 0.4547 | 2.1993 | 0.2678 | 0.7720 | 0.002751 |

---

---

|           |        |        |        |        |          |
|-----------|--------|--------|--------|--------|----------|
| HCG26     | 0.4546 | 2.1999 | 0.2677 | 0.7719 | 0.002752 |
| TARDBP    | 0.4633 | 2.1587 | 0.2765 | 0.7760 | 0.002793 |
| ZNF831    | 0.4585 | 2.1812 | 0.2715 | 0.7743 | 0.002794 |
| P2RY13    | 0.4592 | 2.1777 | 0.2722 | 0.7748 | 0.002795 |
| DOK3      | 0.4635 | 2.1574 | 0.2765 | 0.7771 | 0.002827 |
| RDH5      | 0.4506 | 2.2193 | 0.2634 | 0.7709 | 0.002828 |
| ASF1B     | 0.4650 | 2.1505 | 0.2778 | 0.7785 | 0.002853 |
| EMD       | 0.4612 | 2.1683 | 0.2740 | 0.7763 | 0.002856 |
| GRTP1     | 0.4546 | 2.1999 | 0.2672 | 0.7733 | 0.002857 |
| BCAS3     | 0.4653 | 2.1489 | 0.2781 | 0.7787 | 0.002875 |
| NQO2      | 0.4545 | 2.2002 | 0.2673 | 0.7728 | 0.002892 |
| WNT3A     | 0.4576 | 2.1851 | 0.2702 | 0.7752 | 0.002907 |
| GPS2      | 0.4567 | 2.1896 | 0.2688 | 0.7759 | 0.002948 |
| DNAJC9    | 0.4587 | 2.1799 | 0.2710 | 0.7765 | 0.002948 |
| SLC22A20  | 0.4644 | 2.1535 | 0.2768 | 0.7791 | 0.002955 |
| NUPL1     | 2.1875 | 0.4572 | 1.2888 | 3.7127 | 0.002957 |
| TNFRSF10D | 2.1593 | 0.4631 | 1.2837 | 3.6320 | 0.002971 |
| SMYD2     | 2.1565 | 0.4637 | 1.2827 | 3.6255 | 0.002987 |
| TAF11     | 0.4635 | 2.1576 | 0.2755 | 0.7797 | 0.003    |
| ZNF541    | 0.4628 | 2.1608 | 0.2749 | 0.7792 | 0.003017 |
| CCDC42B   | 0.4586 | 2.1806 | 0.2703 | 0.7781 | 0.003034 |
| SH3GLB2   | 0.4561 | 2.1925 | 0.2680 | 0.7762 | 0.003035 |
| NLRC5     | 0.4616 | 2.1665 | 0.2733 | 0.7795 | 0.003045 |
| ADAMTS12  | 2.1669 | 0.4615 | 1.2824 | 3.6613 | 0.003059 |
| ITGB3     | 2.1702 | 0.4608 | 1.2831 | 3.6704 | 0.003073 |
| SYNGR3    | 0.4633 | 2.1586 | 0.2749 | 0.7808 | 0.003091 |
| NCF1C     | 0.4661 | 2.1454 | 0.2775 | 0.7830 | 0.003118 |
| TUBA4B    | 0.4594 | 2.1767 | 0.2707 | 0.7798 | 0.003138 |
| LDLR      | 2.2427 | 0.4459 | 1.2930 | 3.8901 | 0.003143 |
| MCM2      | 0.4659 | 2.1463 | 0.2771 | 0.7833 | 0.003157 |
| CD3G      | 0.4604 | 2.1722 | 0.2714 | 0.7809 | 0.003183 |
| SLFN14    | 0.4634 | 2.1578 | 0.2746 | 0.7822 | 0.003192 |
| HDHD3     | 0.4539 | 2.2032 | 0.2650 | 0.7774 | 0.003204 |
| RAMP3     | 0.4636 | 2.1572 | 0.2746 | 0.7826 | 0.003207 |
| FAM160B2  | 0.4617 | 2.1661 | 0.2726 | 0.7817 | 0.003221 |
| ARHGAP25  | 0.4641 | 2.1546 | 0.2750 | 0.7833 | 0.003234 |
| TLL1      | 2.1602 | 0.4629 | 1.2767 | 3.6552 | 0.003286 |
| MLNR      | 2.2109 | 0.4523 | 1.2849 | 3.8042 | 0.003292 |
| NEU4      | 0.4574 | 2.1861 | 0.2679 | 0.7811 | 0.003306 |
| FHAD1     | 0.4655 | 2.1483 | 0.2758 | 0.7855 | 0.00333  |
| UBASH3A   | 0.4684 | 2.1349 | 0.2788 | 0.7869 | 0.003353 |
| SLC7A3    | 0.4695 | 2.1298 | 0.2800 | 0.7873 | 0.003355 |
| C17orf90  | 0.4684 | 2.1351 | 0.2787 | 0.7870 | 0.003377 |
| ARRDC5    | 0.4686 | 2.1338 | 0.2788 | 0.7876 | 0.003395 |

---



---

|           |        |        |        |        |          |
|-----------|--------|--------|--------|--------|----------|
| CCR2      | 0.4661 | 2.1453 | 0.2761 | 0.7870 | 0.003429 |
| CENPH     | 0.4593 | 2.1770 | 0.2694 | 0.7832 | 0.003442 |
| USP27X    | 0.4659 | 2.1462 | 0.2757 | 0.7875 | 0.003484 |
| ANKRD20B  | 0.4684 | 2.1349 | 0.2782 | 0.7887 | 0.003488 |
| C14orf2   | 0.4590 | 2.1788 | 0.2687 | 0.7839 | 0.003502 |
| TOR1AIP2  | 2.1620 | 0.4625 | 1.2722 | 3.6744 | 0.003512 |
| FSTL1     | 2.1329 | 0.4688 | 1.2672 | 3.5902 | 0.003522 |
| C22orf13  | 0.4633 | 2.1583 | 0.2728 | 0.7869 | 0.003533 |
| MKNK1     | 0.4687 | 2.1335 | 0.2783 | 0.7894 | 0.00355  |
| ANGPT2    | 2.1548 | 0.4641 | 1.2694 | 3.6577 | 0.003567 |
| CDK5RAP3  | 0.4605 | 2.1714 | 0.2697 | 0.7865 | 0.003582 |
| PLA2G7    | 0.4734 | 2.1125 | 0.2829 | 0.7922 | 0.003592 |
| SELPLG    | 0.4675 | 2.1390 | 0.2768 | 0.7895 | 0.003594 |
| SNRPA     | 0.4634 | 2.1581 | 0.2726 | 0.7876 | 0.003603 |
| RHOD      | 2.1569 | 0.4636 | 1.2691 | 3.6660 | 0.003627 |
| PEAR1     | 2.1405 | 0.4672 | 1.2661 | 3.6190 | 0.003651 |
| CASP2     | 0.4665 | 2.1435 | 0.2753 | 0.7905 | 0.003721 |
| CRADD     | 0.4692 | 2.1314 | 0.2779 | 0.7920 | 0.003721 |
| MAX       | 0.4759 | 2.1011 | 0.2849 | 0.7951 | 0.003729 |
| USP20     | 0.4722 | 2.1177 | 0.2809 | 0.7937 | 0.003739 |
| TNRC18    | 2.1223 | 0.4712 | 1.2612 | 3.5712 | 0.003743 |
| RASGRP2   | 0.4699 | 2.1283 | 0.2785 | 0.7927 | 0.00375  |
| FAM38A    | 2.1615 | 0.4626 | 1.2657 | 3.6914 | 0.003835 |
| SGK1      | 0.4672 | 2.1402 | 0.2753 | 0.7929 | 0.003884 |
| TRIM6     | 2.1638 | 0.4622 | 1.2662 | 3.6974 | 0.003893 |
| MLC1      | 0.4636 | 2.1568 | 0.2715 | 0.7917 | 0.003898 |
| ZNF589    | 0.4726 | 2.1159 | 0.2805 | 0.7962 | 0.003968 |
| UXT       | 0.4699 | 2.1283 | 0.2777 | 0.7949 | 0.003972 |
| SLFN13    | 0.4645 | 2.1528 | 0.2721 | 0.7930 | 0.003979 |
| CCDC34    | 0.4679 | 2.1373 | 0.2756 | 0.7944 | 0.004006 |
| TAS2R10   | 2.1076 | 0.4745 | 1.2534 | 3.5441 | 0.004024 |
| TTC19     | 0.4650 | 2.1506 | 0.2722 | 0.7944 | 0.004098 |
| ORC6L     | 0.4723 | 2.1175 | 0.2795 | 0.7978 | 0.004118 |
| FUT7      | 0.4761 | 2.1005 | 0.2833 | 0.8000 | 0.004127 |
| EPHB6     | 0.4783 | 2.0907 | 0.2857 | 0.8008 | 0.004131 |
| SEC63     | 2.1466 | 0.4659 | 1.2567 | 3.6665 | 0.00416  |
| DMAP1     | 0.4727 | 2.1153 | 0.2797 | 0.7990 | 0.004174 |
| PANK2     | 0.4738 | 2.1104 | 0.2810 | 0.7990 | 0.004176 |
| LOC643008 | 0.4751 | 2.1046 | 0.2822 | 0.7999 | 0.00418  |
| ATP2A3    | 0.4731 | 2.1136 | 0.2802 | 0.7989 | 0.004181 |
| CNIH      | 2.1475 | 0.4657 | 1.2564 | 3.6706 | 0.004206 |
| CERCAM    | 2.1033 | 0.4754 | 1.2495 | 3.5406 | 0.004211 |
| APOBEC3H  | 0.4768 | 2.0974 | 0.2838 | 0.8009 | 0.004218 |
| C16orf54  | 0.4765 | 2.0985 | 0.2835 | 0.8009 | 0.004218 |

---

---

|          |        |        |        |        |          |
|----------|--------|--------|--------|--------|----------|
| TTC16    | 0.4738 | 2.1104 | 0.2807 | 0.7998 | 0.004219 |
| GSTM4    | 0.4740 | 2.1095 | 0.2809 | 0.8001 | 0.004252 |
| TMEM165  | 2.1175 | 0.4723 | 1.2509 | 3.5844 | 0.004286 |
| APOBEC3D | 0.4804 | 2.0816 | 0.2871 | 0.8040 | 0.004332 |
| MYBPC3   | 0.4711 | 2.1225 | 0.2776 | 0.7996 | 0.004352 |
| RPP30    | 0.4708 | 2.1240 | 0.2770 | 0.8001 | 0.004367 |
| ZNF813   | 2.0901 | 0.4785 | 1.2435 | 3.5130 | 0.004437 |
| ZER1     | 0.4808 | 2.0801 | 0.2868 | 0.8058 | 0.00448  |
| FGL2     | 0.4794 | 2.0858 | 0.2854 | 0.8054 | 0.004513 |
| GTPBP1   | 0.4823 | 2.0735 | 0.2883 | 0.8068 | 0.004526 |
| FAIM2    | 0.4726 | 2.1161 | 0.2783 | 0.8024 | 0.004527 |
| OLFM1    | 0.4775 | 2.0941 | 0.2834 | 0.8046 | 0.004537 |
| SLC11A2  | 2.1170 | 0.4724 | 1.2459 | 3.5971 | 0.004548 |
| RBP3     | 0.4784 | 2.0902 | 0.2842 | 0.8052 | 0.0046   |
| ITK      | 0.4775 | 2.0943 | 0.2830 | 0.8057 | 0.004621 |
| DSE      | 2.1124 | 0.4734 | 1.2439 | 3.5873 | 0.004628 |
| KIAA0090 | 2.1714 | 0.4605 | 1.2519 | 3.7662 | 0.00467  |
| HAUS7    | 0.4783 | 2.0908 | 0.2836 | 0.8065 | 0.004691 |
| ORC1L    | 0.4849 | 2.0624 | 0.2904 | 0.8097 | 0.004697 |
| GPX1     | 0.4662 | 2.1448 | 0.2711 | 0.8020 | 0.004718 |
| CD1C     | 0.4803 | 2.0822 | 0.2855 | 0.8079 | 0.004727 |
| PHKG2    | 0.4746 | 2.1070 | 0.2796 | 0.8058 | 0.004736 |
| ANXA2    | 2.0820 | 0.4803 | 1.2372 | 3.5036 | 0.004753 |
| TMC8     | 0.4786 | 2.0895 | 0.2835 | 0.8078 | 0.004786 |
| YPEL3    | 0.4779 | 2.0923 | 0.2828 | 0.8077 | 0.004801 |
| UQCDFS1  | 0.4785 | 2.0899 | 0.2831 | 0.8086 | 0.004862 |
| RBPJ     | 0.4749 | 2.1055 | 0.2794 | 0.8073 | 0.004892 |
| FZR1     | 0.4786 | 2.0893 | 0.2833 | 0.8087 | 0.004893 |
| LUZP1    | 2.1187 | 0.4720 | 1.2407 | 3.6180 | 0.004893 |
| SYCE2    | 0.4799 | 2.0836 | 0.2845 | 0.8095 | 0.004915 |
| ORMDL1   | 0.4785 | 2.0897 | 0.2830 | 0.8091 | 0.004929 |
| PCDHGC5  | 2.0983 | 0.4766 | 1.2369 | 3.5596 | 0.004932 |
| DTL      | 0.4833 | 2.0689 | 0.2880 | 0.8111 | 0.004943 |
| CETN2    | 0.4817 | 2.0762 | 0.2861 | 0.8108 | 0.004964 |
| AGAP2    | 0.4827 | 2.0718 | 0.2872 | 0.8113 | 0.004964 |
| FUCA2    | 2.1055 | 0.4750 | 1.2383 | 3.5799 | 0.004992 |
| DES      | 0.4802 | 2.0827 | 0.2843 | 0.8109 | 0.005049 |
| TBC1D12  | 0.4826 | 2.0720 | 0.2867 | 0.8123 | 0.005065 |
| C4orf38  | 2.0569 | 0.4862 | 1.2284 | 3.4443 | 0.005074 |
| ABHD12   | 0.4867 | 2.0546 | 0.2909 | 0.8144 | 0.005135 |
| KTELC1   | 0.4872 | 2.0523 | 0.2912 | 0.8153 | 0.005163 |
| CD2      | 0.4841 | 2.0656 | 0.2879 | 0.8140 | 0.005194 |
| TP53I3   | 2.0774 | 0.4814 | 1.2302 | 3.5080 | 0.005218 |
| WHAMM    | 0.4855 | 2.0599 | 0.2891 | 0.8153 | 0.005221 |

---

---

|              |        |        |        |        |          |
|--------------|--------|--------|--------|--------|----------|
| GPBAR1       | 0.4822 | 2.0737 | 0.2857 | 0.8140 | 0.005243 |
| IL1A         | 2.0530 | 0.4871 | 1.2261 | 3.4375 | 0.005247 |
| TRAPPC1      | 0.4844 | 2.0642 | 0.2880 | 0.8148 | 0.005259 |
| CXCL1        | 2.0494 | 0.4879 | 1.2250 | 3.4288 | 0.005281 |
| HTATSF1      | 0.4890 | 2.0448 | 0.2927 | 0.8170 | 0.005299 |
| TADA3        | 0.4792 | 2.0870 | 0.2823 | 0.8132 | 0.005322 |
| C1orf74      | 2.1238 | 0.4709 | 1.2347 | 3.6529 | 0.005338 |
| LOC100129066 | 0.4832 | 2.0694 | 0.2864 | 0.8153 | 0.005351 |
| NDUFA6       | 0.4816 | 2.0763 | 0.2848 | 0.8143 | 0.005352 |
| SCN2A        | 2.0562 | 0.4863 | 1.2251 | 3.4509 | 0.005353 |
| HOXA1        | 2.0766 | 0.4816 | 1.2277 | 3.5122 | 0.005358 |
| C1orf228     | 0.4859 | 2.0581 | 0.2891 | 0.8168 | 0.005383 |
| C19orf43     | 0.4787 | 2.0890 | 0.2817 | 0.8136 | 0.005396 |
| PLD4         | 0.4912 | 2.0359 | 0.2944 | 0.8196 | 0.005452 |
| TMED2        | 2.0584 | 0.4858 | 1.2235 | 3.4630 | 0.005457 |
| PMEPA1       | 2.0660 | 0.4840 | 1.2240 | 3.4871 | 0.00548  |
| CD3D         | 0.4841 | 2.0656 | 0.2869 | 0.8170 | 0.00549  |
| RFX2         | 0.4869 | 2.0537 | 0.2898 | 0.8183 | 0.005513 |
| PPP1R16B     | 0.4849 | 2.0623 | 0.2875 | 0.8179 | 0.005534 |
| SP140        | 0.4875 | 2.0512 | 0.2903 | 0.8189 | 0.005552 |
| C16orf79     | 0.4774 | 2.0948 | 0.2796 | 0.8150 | 0.00556  |
| CD48         | 0.4876 | 2.0510 | 0.2903 | 0.8190 | 0.005567 |
| PVRL3        | 2.0709 | 0.4829 | 1.2241 | 3.5032 | 0.005567 |
| HIST1H1C     | 0.4841 | 2.0657 | 0.2868 | 0.8173 | 0.005583 |
| DCI          | 0.4840 | 2.0659 | 0.2864 | 0.8182 | 0.005647 |
| RSPH3        | 2.0971 | 0.4768 | 1.2266 | 3.5856 | 0.005651 |
| GALNT2       | 2.0619 | 0.4850 | 1.2213 | 3.4811 | 0.005651 |
| TMEM130      | 0.4884 | 2.0473 | 0.2909 | 0.8202 | 0.005655 |
| ASCL2        | 0.4778 | 2.0929 | 0.2797 | 0.8163 | 0.005687 |
| FAM65B       | 0.4858 | 2.0586 | 0.2879 | 0.8196 | 0.005711 |
| PRR13        | 0.4879 | 2.0494 | 0.2902 | 0.8205 | 0.005735 |
| NMRAL1       | 0.4800 | 2.0833 | 0.2819 | 0.8174 | 0.00574  |
| TRIM31       | 0.4889 | 2.0455 | 0.2910 | 0.8214 | 0.005763 |
| BIN2         | 0.4913 | 2.0353 | 0.2936 | 0.8223 | 0.005769 |
| PKD2L1       | 0.4891 | 2.0444 | 0.2911 | 0.8219 | 0.005781 |
| FUT11        | 2.0485 | 0.4882 | 1.2177 | 3.4461 | 0.0058   |
| FNDC4        | 2.0449 | 0.4890 | 1.2169 | 3.4361 | 0.005821 |
| MMP8         | 2.0700 | 0.4831 | 1.2201 | 3.5117 | 0.005827 |
| COX4I1       | 0.4825 | 2.0724 | 0.2841 | 0.8195 | 0.005831 |
| HSPA14       | 0.4885 | 2.0469 | 0.2904 | 0.8220 | 0.005848 |
| PDIA3        | 2.0647 | 0.4843 | 1.2181 | 3.4998 | 0.005912 |
| OGFOD2       | 0.4898 | 2.0416 | 0.2914 | 0.8233 | 0.005915 |
| HDAC5        | 0.4921 | 2.0321 | 0.2939 | 0.8241 | 0.005916 |
| XRCC3        | 0.4897 | 2.0422 | 0.2912 | 0.8235 | 0.005948 |

---

---

|           |        |        |        |        |          |
|-----------|--------|--------|--------|--------|----------|
| FAM127B   | 0.4903 | 2.0398 | 0.2919 | 0.8233 | 0.005954 |
| UBAC1     | 0.4870 | 2.0534 | 0.2885 | 0.8222 | 0.005961 |
| IKBKB     | 0.4898 | 2.0416 | 0.2912 | 0.8239 | 0.006003 |
| STX7      | 2.0666 | 0.4839 | 1.2169 | 3.5094 | 0.006084 |
| ABHD14B   | 0.4881 | 2.0487 | 0.2892 | 0.8239 | 0.006094 |
| HCCS      | 0.4943 | 2.0230 | 0.2957 | 0.8262 | 0.006103 |
| FAM102A   | 0.4917 | 2.0337 | 0.2928 | 0.8258 | 0.006167 |
| MYO7B     | 0.4938 | 2.0253 | 0.2948 | 0.8271 | 0.006188 |
| FAIM3     | 0.4885 | 2.0470 | 0.2892 | 0.8251 | 0.006218 |
| VEPH1     | 2.0439 | 0.4893 | 1.2117 | 3.4476 | 0.006237 |
| STAC3     | 0.4917 | 2.0336 | 0.2925 | 0.8267 | 0.00626  |
| TOMM20L   | 0.4924 | 2.0310 | 0.2931 | 0.8272 | 0.006262 |
| EXO1      | 0.4936 | 2.0259 | 0.2945 | 0.8274 | 0.006314 |
| FAM73B    | 0.4899 | 2.0414 | 0.2903 | 0.8266 | 0.006343 |
| SQLE      | 2.0406 | 0.4901 | 1.2096 | 3.4423 | 0.006346 |
| LOC606724 | 0.4900 | 2.0408 | 0.2902 | 0.8275 | 0.006424 |
| WEE1      | 0.4918 | 2.0332 | 0.2920 | 0.8284 | 0.006488 |
| MRPS18C   | 0.4920 | 2.0327 | 0.2923 | 0.8280 | 0.006491 |
| COL4A6    | 2.0397 | 0.4903 | 1.2073 | 3.4462 | 0.006504 |
| THEG      | 0.4933 | 2.0273 | 0.2933 | 0.8296 | 0.006514 |
| C2orf85   | 0.4907 | 2.0379 | 0.2906 | 0.8286 | 0.006546 |
| SLC14A1   | 0.4910 | 2.0366 | 0.2910 | 0.8286 | 0.006553 |
| APOBEC3G  | 0.4964 | 2.0145 | 0.2966 | 0.8309 | 0.006586 |
| IHH       | 0.4881 | 2.0489 | 0.2877 | 0.8281 | 0.006604 |
| GLS2      | 0.4909 | 2.0369 | 0.2905 | 0.8295 | 0.006616 |
| LRRC16B   | 0.4925 | 2.0307 | 0.2923 | 0.8297 | 0.006616 |
| AURKB     | 0.4899 | 2.0413 | 0.2896 | 0.8287 | 0.006617 |
| ATF5      | 0.4878 | 2.0502 | 0.2873 | 0.8280 | 0.006621 |
| KRI1      | 0.4960 | 2.0162 | 0.2958 | 0.8315 | 0.006635 |
| KIAA1671  | 0.5000 | 1.9999 | 0.3001 | 0.8331 | 0.006655 |
| CCNI2     | 0.4960 | 2.0161 | 0.2958 | 0.8316 | 0.006656 |
| ZNF827    | 2.1060 | 0.4748 | 1.2140 | 3.6535 | 0.006679 |
| GGA2      | 0.4954 | 2.0186 | 0.2951 | 0.8317 | 0.00674  |
| PMM1      | 0.4947 | 2.0216 | 0.2942 | 0.8317 | 0.00675  |
| LOC339674 | 0.4975 | 2.0102 | 0.2971 | 0.8328 | 0.006766 |
| TMEM116   | 0.4918 | 2.0333 | 0.2910 | 0.8311 | 0.006794 |
| APOM      | 0.4886 | 2.0468 | 0.2877 | 0.8298 | 0.006797 |
| TIMD4     | 0.4883 | 2.0477 | 0.2874 | 0.8297 | 0.006802 |
| ANKRD55   | 0.4930 | 2.0286 | 0.2921 | 0.8320 | 0.006864 |
| SLC2A8    | 0.4889 | 2.0455 | 0.2878 | 0.8306 | 0.006874 |
| ZNF18     | 0.4930 | 2.0284 | 0.2920 | 0.8325 | 0.00691  |
| HIST1H3G  | 0.4945 | 2.0221 | 0.2936 | 0.8331 | 0.006961 |
| PPP2R3B   | 0.4966 | 2.0139 | 0.2955 | 0.8344 | 0.006988 |
| WAS       | 0.4969 | 2.0125 | 0.2958 | 0.8346 | 0.007003 |

---

---

|           |        |        |        |        |          |
|-----------|--------|--------|--------|--------|----------|
| PPCDC     | 0.4865 | 2.0555 | 0.2848 | 0.8311 | 0.007049 |
| MOBKL2C   | 0.4979 | 2.0084 | 0.2967 | 0.8356 | 0.00708  |
| PRKAA2    | 2.0099 | 0.4975 | 1.1969 | 3.3754 | 0.007093 |
| MGMT      | 0.4956 | 2.0176 | 0.2943 | 0.8348 | 0.007103 |
| C6orf211  | 2.0312 | 0.4923 | 1.1990 | 3.4409 | 0.007142 |
| PISD      | 0.4980 | 2.0082 | 0.2967 | 0.8357 | 0.00715  |
| CTU1      | 2.0078 | 0.4981 | 1.1958 | 3.3710 | 0.00718  |
| NHEDC1    | 0.4998 | 2.0007 | 0.2985 | 0.8370 | 0.007185 |
| ATG3      | 0.5017 | 1.9930 | 0.3004 | 0.8379 | 0.007196 |
| SIRT7     | 0.5004 | 1.9984 | 0.2989 | 0.8378 | 0.00723  |
| KIAA0114  | 0.4981 | 2.0077 | 0.2965 | 0.8369 | 0.007246 |
| RPL23AP7  | 2.0492 | 0.4880 | 1.1999 | 3.4997 | 0.007272 |
| CHIT1     | 0.5029 | 1.9886 | 0.3014 | 0.8391 | 0.007285 |
| ADORA2A   | 0.4985 | 2.0062 | 0.2967 | 0.8373 | 0.007285 |
| CDH2      | 2.0002 | 0.5000 | 1.1931 | 3.3533 | 0.007312 |
| LOC284023 | 0.4973 | 2.0108 | 0.2954 | 0.8373 | 0.007317 |
| C17orf59  | 0.4991 | 2.0035 | 0.2972 | 0.8381 | 0.007334 |
| SEC31A    | 1.9997 | 0.5001 | 1.1931 | 3.3517 | 0.00734  |
| HECW1     | 2.0063 | 0.4984 | 1.1933 | 3.3731 | 0.007362 |
| ZNF488    | 0.4995 | 2.0019 | 0.2978 | 0.8379 | 0.007382 |
| TNFRSF13B | 0.5028 | 1.9888 | 0.3011 | 0.8396 | 0.007384 |
| HDAC8     | 0.5002 | 1.9991 | 0.2983 | 0.8388 | 0.007427 |
| DUOX1     | 0.4989 | 2.0042 | 0.2969 | 0.8386 | 0.007435 |
| PLCB2     | 0.5019 | 1.9924 | 0.3000 | 0.8398 | 0.007453 |
| FAM20C    | 2.0157 | 0.4961 | 1.1948 | 3.4006 | 0.007457 |
| TLL2      | 0.5000 | 1.9999 | 0.2979 | 0.8392 | 0.007466 |
| PDK2      | 0.4995 | 2.0021 | 0.2973 | 0.8392 | 0.007468 |
| KIF25     | 0.5006 | 1.9974 | 0.2986 | 0.8393 | 0.007472 |
| RBM22     | 0.4926 | 2.0301 | 0.2901 | 0.8365 | 0.007473 |
| UNG       | 0.4929 | 2.0289 | 0.2903 | 0.8367 | 0.007485 |
| 1-Sep     | 0.5018 | 1.9928 | 0.2997 | 0.8403 | 0.007499 |
| RPGR      | 0.5022 | 1.9911 | 0.3005 | 0.8394 | 0.007512 |
| ACOT1     | 0.5015 | 1.9939 | 0.2994 | 0.8401 | 0.007521 |
| LOC388588 | 2.0132 | 0.4967 | 1.1925 | 3.3989 | 0.007545 |
| PYHIN1    | 0.5023 | 1.9908 | 0.3001 | 0.8407 | 0.007563 |
| MDM1      | 0.5000 | 2.0000 | 0.2976 | 0.8400 | 0.007609 |
| CST7      | 0.5006 | 1.9974 | 0.2982 | 0.8406 | 0.007619 |
| RASSF5    | 0.4995 | 2.0020 | 0.2969 | 0.8403 | 0.007621 |
| AKAP11    | 2.0457 | 0.4888 | 1.1959 | 3.4993 | 0.007627 |
| RBMX2     | 0.4974 | 2.0106 | 0.2947 | 0.8395 | 0.007637 |
| EEFSEC    | 0.5028 | 1.9888 | 0.3003 | 0.8419 | 0.007645 |
| YBX2      | 0.4955 | 2.0181 | 0.2927 | 0.8388 | 0.007672 |
| RCC2      | 0.5028 | 1.9890 | 0.3003 | 0.8418 | 0.007691 |
| RBM28     | 2.0258 | 0.4936 | 1.1923 | 3.4422 | 0.007724 |

---

---

|          |        |        |        |        |          |
|----------|--------|--------|--------|--------|----------|
| PDE5A    | 0.5037 | 1.9852 | 0.3012 | 0.8425 | 0.007737 |
| PGK1     | 1.9936 | 0.5016 | 1.1869 | 3.3486 | 0.007776 |
| CENPP    | 0.4994 | 2.0022 | 0.2964 | 0.8415 | 0.007795 |
| NKAP     | 0.5014 | 1.9943 | 0.2985 | 0.8423 | 0.007817 |
| NPL      | 0.5012 | 1.9952 | 0.2981 | 0.8426 | 0.007871 |
| MSRA     | 0.4958 | 2.0168 | 0.2922 | 0.8413 | 0.007955 |
| C17orf49 | 0.4960 | 2.0161 | 0.2923 | 0.8416 | 0.007958 |
| ISG20    | 0.5020 | 1.9921 | 0.2988 | 0.8435 | 0.007972 |
| ZNF77    | 0.5024 | 1.9906 | 0.2993 | 0.8431 | 0.007982 |
| WDR45    | 0.5045 | 1.9822 | 0.3012 | 0.8449 | 0.008017 |
| C1orf161 | 2.0183 | 0.4955 | 1.1884 | 3.4276 | 0.008023 |
| GNB1     | 2.0022 | 0.4994 | 1.1857 | 3.3811 | 0.008076 |
| HIST1H4I | 0.5020 | 1.9919 | 0.2986 | 0.8442 | 0.008088 |
| ACSBG1   | 0.5021 | 1.9915 | 0.2986 | 0.8445 | 0.008107 |
| HRASLS2  | 0.5028 | 1.9889 | 0.2994 | 0.8444 | 0.008114 |
| RNF212   | 0.5034 | 1.9866 | 0.2997 | 0.8454 | 0.008131 |
| IFI30    | 0.5055 | 1.9783 | 0.3021 | 0.8459 | 0.008142 |
| LCMT1    | 0.5062 | 1.9756 | 0.3026 | 0.8467 | 0.008173 |
| FMR1     | 0.5069 | 1.9728 | 0.3034 | 0.8468 | 0.008179 |
| SLC19A3  | 2.0024 | 0.4994 | 1.1846 | 3.3848 | 0.008185 |
| CACNA1D  | 0.5035 | 1.9861 | 0.2998 | 0.8457 | 0.008201 |
| SPRY4    | 1.9856 | 0.5036 | 1.1820 | 3.3356 | 0.008213 |
| POU2AF1  | 0.5009 | 1.9966 | 0.2968 | 0.8451 | 0.008215 |
| GGN      | 1.9909 | 0.5023 | 1.1832 | 3.3500 | 0.00823  |
| OBFC2B   | 0.4971 | 2.0118 | 0.2927 | 0.8442 | 0.008299 |
| DERL3    | 0.5016 | 1.9937 | 0.2972 | 0.8464 | 0.008349 |
| TCF7     | 0.5050 | 1.9803 | 0.3010 | 0.8472 | 0.008381 |
| NSMCE4A  | 0.4983 | 2.0067 | 0.2938 | 0.8454 | 0.008382 |
| MMP1     | 1.9880 | 0.5030 | 1.1806 | 3.3478 | 0.00841  |
| SCML4    | 0.5017 | 1.9932 | 0.2973 | 0.8467 | 0.008441 |
| SLC30A1  | 2.0030 | 0.4993 | 1.1826 | 3.3924 | 0.008448 |
| PSTPIP1  | 0.5023 | 1.9909 | 0.2977 | 0.8474 | 0.008486 |
| OSTM1    | 1.9969 | 0.5008 | 1.1805 | 3.3781 | 0.008518 |
| NDUFB7   | 0.5033 | 1.9870 | 0.2988 | 0.8478 | 0.008519 |
| HPCA     | 0.5057 | 1.9776 | 0.3012 | 0.8490 | 0.008554 |
| CXCR5    | 0.5052 | 1.9793 | 0.3007 | 0.8490 | 0.008564 |
| C12orf47 | 0.4991 | 2.0036 | 0.2942 | 0.8468 | 0.008582 |
| KCNJ10   | 0.5082 | 1.9679 | 0.3036 | 0.8504 | 0.008663 |
| KCNK5    | 0.5074 | 1.9709 | 0.3029 | 0.8499 | 0.008667 |
| DHRS4L1  | 0.5059 | 1.9768 | 0.3009 | 0.8504 | 0.008711 |
| IFT27    | 0.5085 | 1.9665 | 0.3038 | 0.8511 | 0.008714 |
| MND1     | 0.5050 | 1.9804 | 0.3003 | 0.8489 | 0.008724 |
| ZIC2     | 0.5082 | 1.9677 | 0.3034 | 0.8513 | 0.008737 |
| CYP19A1  | 2.0011 | 0.4997 | 1.1791 | 3.3962 | 0.008763 |

---

---

|              |        |        |        |        |          |
|--------------|--------|--------|--------|--------|----------|
| MME          | 1.9995 | 0.5001 | 1.1794 | 3.3898 | 0.008767 |
| LBX2         | 0.4997 | 2.0012 | 0.2944 | 0.8483 | 0.00877  |
| IKBKG        | 0.5084 | 1.9669 | 0.3036 | 0.8513 | 0.008777 |
| POLR3K       | 0.5059 | 1.9765 | 0.3009 | 0.8506 | 0.008833 |
| SLC25A23     | 0.5076 | 1.9699 | 0.3026 | 0.8516 | 0.008883 |
| YWHAG        | 2.0152 | 0.4962 | 1.1792 | 3.4441 | 0.0089   |
| RIMS4        | 1.9994 | 0.5002 | 1.1776 | 3.3948 | 0.00893  |
| IL21R        | 0.5094 | 1.9631 | 0.3043 | 0.8526 | 0.008936 |
| SLC35F5      | 1.9842 | 0.5040 | 1.1755 | 3.3494 | 0.00894  |
| IGF2R        | 2.0306 | 0.4925 | 1.1804 | 3.4931 | 0.008953 |
| IGJ          | 0.5075 | 1.9703 | 0.3022 | 0.8525 | 0.008966 |
| PIM2         | 0.5113 | 1.9556 | 0.3063 | 0.8537 | 0.008969 |
| SHC1         | 1.9689 | 0.5079 | 1.1736 | 3.3032 | 0.008978 |
| GNG3         | 0.5064 | 1.9747 | 0.3008 | 0.8524 | 0.009077 |
| LILRB3       | 0.5078 | 1.9694 | 0.3023 | 0.8528 | 0.009078 |
| HMHA1        | 0.5052 | 1.9796 | 0.2994 | 0.8524 | 0.009087 |
| MCCC1        | 0.5053 | 1.9789 | 0.2995 | 0.8526 | 0.009088 |
| ZCWPW1       | 0.5109 | 1.9573 | 0.3055 | 0.8545 | 0.009108 |
| USP45        | 1.9919 | 0.5020 | 1.1742 | 3.3789 | 0.009121 |
| ALG1L        | 0.5106 | 1.9583 | 0.3051 | 0.8545 | 0.00913  |
| LOC148709    | 0.5050 | 1.9801 | 0.2992 | 0.8526 | 0.009173 |
| ZFP3         | 0.5026 | 1.9896 | 0.2966 | 0.8516 | 0.009202 |
| GPN3         | 0.5108 | 1.9578 | 0.3052 | 0.8548 | 0.009208 |
| CLDN1        | 0.5133 | 1.9482 | 0.3079 | 0.8557 | 0.009225 |
| PEF1         | 0.5085 | 1.9666 | 0.3025 | 0.8546 | 0.00923  |
| CDCA2        | 0.5039 | 1.9845 | 0.2978 | 0.8526 | 0.009239 |
| FGL1         | 1.9647 | 0.5090 | 1.1698 | 3.2998 | 0.009244 |
| DNAH8        | 0.5132 | 1.9485 | 0.3077 | 0.8559 | 0.009244 |
| LOC100130872 | 0.5076 | 1.9699 | 0.3016 | 0.8544 | 0.009276 |
| NFATC2IP     | 0.5086 | 1.9662 | 0.3027 | 0.8545 | 0.009288 |
| LTK          | 0.5090 | 1.9646 | 0.3030 | 0.8550 | 0.009295 |
| SNX20        | 0.5115 | 1.9549 | 0.3058 | 0.8558 | 0.009316 |
| BLM          | 0.5063 | 1.9753 | 0.3001 | 0.8540 | 0.009336 |
| AMPD1        | 0.5078 | 1.9691 | 0.3018 | 0.8547 | 0.009338 |
| BZW1         | 1.9541 | 0.5117 | 1.1676 | 3.2706 | 0.00936  |
| C18orf8      | 0.5059 | 1.9765 | 0.2997 | 0.8543 | 0.00937  |
| LOC728743    | 0.4933 | 2.0270 | 0.2862 | 0.8503 | 0.009389 |
| ZSCAN5B      | 2.0042 | 0.4990 | 1.1737 | 3.4221 | 0.009392 |
| FAM32A       | 0.5092 | 1.9637 | 0.3030 | 0.8558 | 0.009468 |
| RIBC1        | 0.5099 | 1.9612 | 0.3036 | 0.8565 | 0.0095   |
| CDK11B       | 0.5126 | 1.9509 | 0.3063 | 0.8578 | 0.009524 |
| WRAP53       | 0.5077 | 1.9698 | 0.3009 | 0.8565 | 0.009581 |
| MUC21        | 0.5099 | 1.9610 | 0.3034 | 0.8572 | 0.0096   |
| ITIH1        | 0.5097 | 1.9620 | 0.3031 | 0.8570 | 0.009613 |

---

---

|           |        |        |        |        |          |
|-----------|--------|--------|--------|--------|----------|
| PTPN18    | 0.5108 | 1.9578 | 0.3041 | 0.8580 | 0.009646 |
| IGSF6     | 0.5132 | 1.9485 | 0.3068 | 0.8585 | 0.009664 |
| PCDHB12   | 1.9576 | 0.5108 | 1.1654 | 3.2884 | 0.009687 |
| SCML1     | 0.5139 | 1.9460 | 0.3075 | 0.8587 | 0.009689 |
| ANAPC13   | 0.5108 | 1.9576 | 0.3042 | 0.8579 | 0.009692 |
| TUBGCP6   | 0.5141 | 1.9453 | 0.3077 | 0.8588 | 0.009696 |
| LCK       | 0.5132 | 1.9486 | 0.3067 | 0.8588 | 0.009722 |
| CTRL      | 0.5074 | 1.9707 | 0.3005 | 0.8570 | 0.00975  |
| EML6      | 0.5154 | 1.9404 | 0.3089 | 0.8599 | 0.009781 |
| SFT2D1    | 1.9654 | 0.5088 | 1.1657 | 3.3135 | 0.0098   |
| TCN2      | 0.5112 | 1.9563 | 0.3043 | 0.8587 | 0.009808 |
| NAT8B     | 0.5153 | 1.9407 | 0.3087 | 0.8602 | 0.009821 |
| PIK3AP1   | 0.5118 | 1.9541 | 0.3047 | 0.8594 | 0.009886 |
| SUCLA2    | 1.9610 | 0.5100 | 1.1648 | 3.3013 | 0.009894 |
| WDR76     | 0.5105 | 1.9590 | 0.3035 | 0.8587 | 0.009897 |
| ZNF26     | 0.5103 | 1.9596 | 0.3032 | 0.8589 | 0.009912 |
| NRF1      | 0.5116 | 1.9546 | 0.3045 | 0.8597 | 0.009918 |
| RHOG      | 0.5140 | 1.9455 | 0.3070 | 0.8606 | 0.00999  |
| CLIC4     | 1.9787 | 0.5054 | 1.1655 | 3.3594 | 0.010001 |
| DLG3      | 0.5143 | 1.9442 | 0.3073 | 0.8609 | 0.01001  |
| FAM118A   | 0.5126 | 1.9509 | 0.3054 | 0.8602 | 0.010012 |
| C14orf139 | 0.5140 | 1.9454 | 0.3070 | 0.8606 | 0.010016 |
| P2RY10    | 0.5126 | 1.9510 | 0.3052 | 0.8607 | 0.010055 |
| RHOH      | 0.5150 | 1.9416 | 0.3079 | 0.8616 | 0.010073 |
| GALNT10   | 1.9758 | 0.5061 | 1.1645 | 3.3524 | 0.010075 |
| SYT14     | 1.9623 | 0.5096 | 1.1628 | 3.3113 | 0.010077 |
| KLHL17    | 1.9657 | 0.5087 | 1.1637 | 3.3203 | 0.010082 |
| SPNS3     | 0.5129 | 1.9497 | 0.3054 | 0.8613 | 0.010116 |
| C20orf43  | 0.5154 | 1.9401 | 0.3081 | 0.8622 | 0.0102   |
| BRAP      | 0.5102 | 1.9601 | 0.3023 | 0.8611 | 0.010216 |
| TYMS      | 0.5128 | 1.9499 | 0.3051 | 0.8619 | 0.010217 |
| CXCR3     | 0.5154 | 1.9404 | 0.3079 | 0.8625 | 0.010217 |
| FBXO31    | 0.5134 | 1.9477 | 0.3058 | 0.8621 | 0.01025  |
| TIGIT     | 0.5159 | 1.9385 | 0.3084 | 0.8630 | 0.010271 |
| MYLIP     | 0.5137 | 1.9468 | 0.3058 | 0.8627 | 0.010298 |
| FGD2      | 0.5180 | 1.9303 | 0.3106 | 0.8639 | 0.010309 |
| OSMR      | 1.9864 | 0.5034 | 1.1630 | 3.3927 | 0.010401 |
| GSG2      | 0.5110 | 1.9569 | 0.3028 | 0.8623 | 0.010416 |
| LILRB4    | 0.5180 | 1.9305 | 0.3104 | 0.8645 | 0.010424 |
| ZNF80     | 0.5163 | 1.9367 | 0.3085 | 0.8642 | 0.01045  |
| SEC23A    | 1.9687 | 0.5080 | 1.1601 | 3.3407 | 0.010483 |
| OMA1      | 0.5146 | 1.9433 | 0.3064 | 0.8643 | 0.010515 |
| SFRS3     | 0.5150 | 1.9418 | 0.3070 | 0.8638 | 0.010525 |
| RPA1      | 0.5139 | 1.9460 | 0.3055 | 0.8644 | 0.010593 |

---



---

|          |        |        |        |        |          |
|----------|--------|--------|--------|--------|----------|
| CPNE9    | 0.5167 | 1.9354 | 0.3085 | 0.8653 | 0.010655 |
| DMC1     | 0.5167 | 1.9352 | 0.3086 | 0.8653 | 0.010656 |
| GPKOW    | 0.5179 | 1.9309 | 0.3098 | 0.8658 | 0.010657 |
| MEPCE    | 0.5142 | 1.9447 | 0.3058 | 0.8648 | 0.010661 |
| F5       | 0.5179 | 1.9308 | 0.3095 | 0.8668 | 0.010773 |
| FLJ33360 | 0.5158 | 1.9387 | 0.3071 | 0.8664 | 0.010865 |
| RNASEH2A | 0.5153 | 1.9407 | 0.3065 | 0.8663 | 0.010871 |
| LYSMD4   | 0.5127 | 1.9505 | 0.3036 | 0.8659 | 0.010873 |
| COPS3    | 0.5131 | 1.9491 | 0.3041 | 0.8654 | 0.01088  |
| CD177    | 0.5199 | 1.9236 | 0.3113 | 0.8682 | 0.010939 |
| GCH1     | 0.5212 | 1.9187 | 0.3125 | 0.8692 | 0.011024 |
| TCTN1    | 0.5133 | 1.9482 | 0.3041 | 0.8665 | 0.011055 |
| SLC39A1  | 1.9313 | 0.5178 | 1.1523 | 3.2371 | 0.011055 |
| ELK3     | 1.9743 | 0.5065 | 1.1563 | 3.3709 | 0.011082 |
| C9orf37  | 0.5142 | 1.9449 | 0.3048 | 0.8674 | 0.011088 |
| OXNAD1   | 0.5167 | 1.9352 | 0.3076 | 0.8680 | 0.011102 |
| HSF5     | 0.5213 | 1.9184 | 0.3124 | 0.8697 | 0.01111  |
| TSPAN32  | 0.5192 | 1.9261 | 0.3102 | 0.8690 | 0.01114  |
| SEMA4D   | 0.5205 | 1.9211 | 0.3117 | 0.8695 | 0.011157 |
| ZNF688   | 0.5070 | 1.9722 | 0.2970 | 0.8657 | 0.011164 |
| C1orf61  | 0.5173 | 1.9332 | 0.3080 | 0.8687 | 0.011191 |
| SYF2     | 0.5134 | 1.9477 | 0.3039 | 0.8673 | 0.011196 |
| NCSTN    | 1.9569 | 0.5110 | 1.1534 | 3.3203 | 0.011237 |
| IL3RA    | 0.5204 | 1.9216 | 0.3111 | 0.8706 | 0.011328 |
| PABPN1   | 0.5178 | 1.9314 | 0.3084 | 0.8694 | 0.011341 |
| NOS2     | 0.5190 | 1.9269 | 0.3096 | 0.8701 | 0.011349 |
| TEX12    | 0.5117 | 1.9541 | 0.3016 | 0.8682 | 0.011359 |
| LFNG     | 0.5148 | 1.9427 | 0.3049 | 0.8691 | 0.011402 |
| UPB1     | 0.5192 | 1.9259 | 0.3097 | 0.8705 | 0.011437 |
| NSDHL    | 0.5184 | 1.9289 | 0.3089 | 0.8701 | 0.011446 |
| CYP2D6   | 0.5206 | 1.9208 | 0.3112 | 0.8709 | 0.011463 |
| ABCB9    | 0.5180 | 1.9307 | 0.3082 | 0.8705 | 0.011466 |
| FAM171B  | 1.9267 | 0.5190 | 1.1485 | 3.2322 | 0.011478 |
| CD46     | 1.9487 | 0.5132 | 1.1507 | 3.2999 | 0.011478 |
| CCDC101  | 0.5199 | 1.9236 | 0.3102 | 0.8712 | 0.011493 |
| SLC2A9   | 1.9258 | 0.5193 | 1.1485 | 3.2293 | 0.011501 |
| SV2A     | 1.9542 | 0.5117 | 1.1509 | 3.3180 | 0.011505 |
| CSPG4    | 1.9152 | 0.5221 | 1.1469 | 3.1983 | 0.011516 |
| SPG21    | 0.5206 | 1.9209 | 0.3110 | 0.8713 | 0.011531 |
| C19orf52 | 0.5152 | 1.9409 | 0.3050 | 0.8703 | 0.011585 |
| ADAMTS3  | 1.9377 | 0.5161 | 1.1488 | 3.2686 | 0.011588 |
| GRB7     | 0.5190 | 1.9268 | 0.3090 | 0.8716 | 0.011602 |
| ZNF524   | 0.5196 | 1.9245 | 0.3097 | 0.8718 | 0.011632 |
| TCP11    | 0.5206 | 1.9208 | 0.3108 | 0.8722 | 0.011646 |

---

---

|              |        |        |        |        |          |
|--------------|--------|--------|--------|--------|----------|
| C16orf55     | 0.5159 | 1.9384 | 0.3055 | 0.8712 | 0.011705 |
| ADAM9        | 1.9282 | 0.5186 | 1.1466 | 3.2426 | 0.011715 |
| SPTLC3       | 1.9410 | 0.5152 | 1.1474 | 3.2834 | 0.011783 |
| JUN          | 1.9154 | 0.5221 | 1.1445 | 3.2055 | 0.011822 |
| ZNF469       | 1.9176 | 0.5215 | 1.1443 | 3.2135 | 0.011889 |
| TAF5         | 0.5211 | 1.9191 | 0.3107 | 0.8737 | 0.011895 |
| C6orf26      | 0.5169 | 1.9348 | 0.3062 | 0.8725 | 0.011897 |
| SMO          | 1.9160 | 0.5219 | 1.1442 | 3.2084 | 0.011915 |
| LRRC27       | 0.5131 | 1.9489 | 0.3021 | 0.8714 | 0.011916 |
| GXYLT2       | 1.9276 | 0.5188 | 1.1455 | 3.2437 | 0.011958 |
| SLC39A4      | 1.9239 | 0.5198 | 1.1445 | 3.2340 | 0.011986 |
| HLA-DPB1     | 0.5219 | 1.9161 | 0.3116 | 0.8741 | 0.012    |
| CNKSR2       | 0.5140 | 1.9454 | 0.3029 | 0.8725 | 0.012005 |
| MSL2         | 0.5250 | 1.9048 | 0.3148 | 0.8757 | 0.012009 |
| CLOCK        | 1.9335 | 0.5172 | 1.1452 | 3.2644 | 0.012018 |
| NMNAT1       | 1.9216 | 0.5204 | 1.1438 | 3.2283 | 0.012037 |
| ABHD1        | 1.9456 | 0.5140 | 1.1463 | 3.3022 | 0.01204  |
| BRCC3        | 0.5220 | 1.9159 | 0.3113 | 0.8750 | 0.012085 |
| VAV3         | 0.5234 | 1.9105 | 0.3129 | 0.8756 | 0.012127 |
| LOC285696    | 1.9432 | 0.5146 | 1.1451 | 3.2975 | 0.012186 |
| SHANK2       | 1.9090 | 0.5238 | 1.1412 | 3.1933 | 0.012199 |
| OTUB2        | 1.9198 | 0.5209 | 1.1427 | 3.2253 | 0.012216 |
| SLC1A4       | 0.5236 | 1.9097 | 0.3130 | 0.8761 | 0.012238 |
| STARD4       | 1.9302 | 0.5181 | 1.1430 | 3.2593 | 0.012241 |
| LOC100132831 | 0.5206 | 1.9207 | 0.3097 | 0.8752 | 0.012254 |
| KNTC1        | 0.5211 | 1.9189 | 0.3100 | 0.8760 | 0.01229  |
| PCDHA1       | 1.8979 | 0.5269 | 1.1396 | 3.1607 | 0.012297 |
| TBC1D15      | 0.5271 | 1.8973 | 0.3165 | 0.8777 | 0.012298 |
| KIFC1        | 0.5255 | 1.9030 | 0.3148 | 0.8771 | 0.012309 |
| C5orf20      | 0.5263 | 1.8999 | 0.3156 | 0.8778 | 0.012364 |
| ELP2P        | 0.5109 | 1.9575 | 0.2989 | 0.8732 | 0.01238  |
| MLLT4        | 1.9411 | 0.5152 | 1.1430 | 3.2965 | 0.012458 |
| C3orf42      | 0.5235 | 1.9104 | 0.3124 | 0.8771 | 0.012467 |
| SERPINB3     | 1.9118 | 0.5231 | 1.1397 | 3.2069 | 0.012512 |
| PTPN14       | 1.9524 | 0.5122 | 1.1434 | 3.3339 | 0.012566 |
| ENTPD3       | 1.9135 | 0.5226 | 1.1389 | 3.2150 | 0.012571 |
| SYTL3        | 0.5244 | 1.9070 | 0.3132 | 0.8780 | 0.012573 |
| LOC399815    | 0.5229 | 1.9123 | 0.3116 | 0.8775 | 0.012578 |
| RAD54L       | 0.5277 | 1.8950 | 0.3166 | 0.8795 | 0.012595 |
| DDX27        | 0.5252 | 1.9041 | 0.3139 | 0.8788 | 0.012633 |
| CSRNP3       | 1.9234 | 0.5199 | 1.1396 | 3.2463 | 0.01268  |
| P4HA1        | 1.8937 | 0.5281 | 1.1361 | 3.1565 | 0.012682 |
| CARNS1       | 0.5261 | 1.9006 | 0.3149 | 0.8791 | 0.012693 |
| SERPINE1     | 1.9350 | 0.5168 | 1.1401 | 3.2840 | 0.012706 |

---

---

|          |        |        |        |        |          |
|----------|--------|--------|--------|--------|----------|
| ACAD10   | 0.5171 | 1.9338 | 0.3047 | 0.8775 | 0.012832 |
| FAM3B    | 0.5234 | 1.9106 | 0.3116 | 0.8792 | 0.012849 |
| TRAF3IP2 | 1.9102 | 0.5235 | 1.1363 | 3.2110 | 0.012894 |
| INHBA    | 1.9022 | 0.5257 | 1.1358 | 3.1858 | 0.012898 |
| FLNA     | 1.9322 | 0.5175 | 1.1391 | 3.2777 | 0.012899 |
| PDXP     | 0.5266 | 1.8988 | 0.3149 | 0.8807 | 0.012953 |
| CTAGE4   | 1.9189 | 0.5211 | 1.1369 | 3.2390 | 0.012957 |
| C6orf97  | 0.5245 | 1.9067 | 0.3123 | 0.8807 | 0.01304  |
| ENO1     | 1.9325 | 0.5175 | 1.1377 | 3.2824 | 0.013105 |
| TFF3     | 0.5250 | 1.9047 | 0.3127 | 0.8814 | 0.013138 |
| DEFA1B   | 1.9055 | 0.5248 | 1.1347 | 3.1998 | 0.013144 |
| CD300LF  | 0.5292 | 1.8896 | 0.3174 | 0.8825 | 0.013158 |
| MAN2A1   | 1.9200 | 0.5208 | 1.1361 | 3.2447 | 0.013176 |
| ANKRD22  | 0.5211 | 1.9192 | 0.3084 | 0.8802 | 0.013207 |
| FAM180B  | 0.5272 | 1.8969 | 0.3151 | 0.8820 | 0.013211 |
| CYP11A1  | 1.8937 | 0.5281 | 1.1329 | 3.1654 | 0.013223 |
| CYTH4    | 0.5275 | 1.8956 | 0.3153 | 0.8826 | 0.01326  |
| GBE1     | 1.9058 | 0.5247 | 1.1335 | 3.2042 | 0.013303 |
| IL10RA   | 0.5282 | 1.8933 | 0.3158 | 0.8833 | 0.013325 |
| ASCC3    | 1.9276 | 0.5188 | 1.1354 | 3.2728 | 0.013338 |
| E2F1     | 0.5277 | 1.8951 | 0.3153 | 0.8831 | 0.01334  |
| HK3      | 0.5304 | 1.8854 | 0.3181 | 0.8843 | 0.013415 |
| SKIL     | 1.9061 | 0.5246 | 1.1331 | 3.2062 | 0.013429 |
| COPE     | 0.5196 | 1.9246 | 0.3063 | 0.8814 | 0.013443 |
| SFRS7    | 0.5298 | 1.8877 | 0.3175 | 0.8838 | 0.013492 |
| KLRK1    | 0.5232 | 1.9114 | 0.3101 | 0.8826 | 0.013497 |
| ZAP70    | 0.5302 | 1.8861 | 0.3178 | 0.8844 | 0.013506 |
| FAM190A  | 1.8993 | 0.5265 | 1.1321 | 3.1863 | 0.01351  |
| ATG4D    | 0.5223 | 1.9145 | 0.3091 | 0.8828 | 0.013576 |
| XAB2     | 0.5263 | 1.9000 | 0.3133 | 0.8842 | 0.013606 |
| ZNF385B  | 1.9123 | 0.5229 | 1.1324 | 3.2293 | 0.013629 |
| PQBP1    | 0.5256 | 1.9026 | 0.3126 | 0.8836 | 0.013657 |
| C1orf200 | 0.5324 | 1.8782 | 0.3200 | 0.8859 | 0.013673 |
| ACAP1    | 0.5268 | 1.8984 | 0.3137 | 0.8846 | 0.013684 |
| ADCY6    | 1.8919 | 0.5286 | 1.1302 | 3.1672 | 0.013699 |
| C13orf27 | 0.5258 | 1.9019 | 0.3127 | 0.8840 | 0.013708 |
| ARHGAP28 | 1.9022 | 0.5257 | 1.1307 | 3.2002 | 0.013713 |
| DARC     | 0.5297 | 1.8877 | 0.3168 | 0.8860 | 0.013745 |
| BIN3     | 0.5252 | 1.9039 | 0.3120 | 0.8842 | 0.013755 |
| LRRC3    | 1.9098 | 0.5236 | 1.1314 | 3.2238 | 0.013758 |
| SELO     | 0.5208 | 1.9203 | 0.3069 | 0.8835 | 0.013761 |
| APITD1   | 0.5279 | 1.8942 | 0.3149 | 0.8851 | 0.013767 |
| CBX7     | 0.5305 | 1.8849 | 0.3176 | 0.8861 | 0.013774 |
| RSP01    | 0.5295 | 1.8884 | 0.3166 | 0.8858 | 0.013796 |

---

---

|          |        |        |        |        |          |
|----------|--------|--------|--------|--------|----------|
| CNP      | 0.5283 | 1.8928 | 0.3152 | 0.8855 | 0.013819 |
| CD79B    | 0.5273 | 1.8965 | 0.3139 | 0.8857 | 0.013834 |
| PPP1R10  | 0.5293 | 1.8893 | 0.3163 | 0.8857 | 0.013847 |
| C6orf72  | 1.9258 | 0.5193 | 1.1320 | 3.2765 | 0.01388  |
| ARF1     | 1.8992 | 0.5265 | 1.1297 | 3.1929 | 0.013889 |
| C18orf21 | 0.5206 | 1.9207 | 0.3067 | 0.8837 | 0.013891 |
| TMEM63B  | 1.9195 | 0.5210 | 1.1313 | 3.2568 | 0.013896 |
| PDIA3P   | 1.8984 | 0.5268 | 1.1288 | 3.1928 | 0.013905 |
| MAMDC2   | 1.8978 | 0.5269 | 1.1291 | 3.1900 | 0.013913 |
| TIAF1    | 0.5264 | 1.8999 | 0.3129 | 0.8854 | 0.013933 |
| TNFAIP6  | 1.8955 | 0.5276 | 1.1287 | 3.1834 | 0.013949 |
| IL12RB1  | 0.5304 | 1.8854 | 0.3172 | 0.8868 | 0.013967 |
| TMEM9    | 1.9056 | 0.5248 | 1.1298 | 3.2140 | 0.013982 |
| POSTN    | 1.8955 | 0.5276 | 1.1285 | 3.1838 | 0.013985 |
| FAM21C   | 0.5312 | 1.8825 | 0.3180 | 0.8873 | 0.014007 |
| SOCS6    | 1.8862 | 0.5302 | 1.1269 | 3.1570 | 0.014008 |
| FAM57B   | 0.5287 | 1.8915 | 0.3153 | 0.8863 | 0.014024 |
| CCDC159  | 0.5250 | 1.9047 | 0.3112 | 0.8859 | 0.014041 |
| C4orf23  | 0.5251 | 1.9045 | 0.3112 | 0.8861 | 0.014077 |
| DENND1C  | 0.5345 | 1.8711 | 0.3214 | 0.8886 | 0.014077 |
| ZNF101   | 0.5343 | 1.8716 | 0.3210 | 0.8893 | 0.014257 |
| TTC39B   | 0.5336 | 1.8740 | 0.3203 | 0.8891 | 0.014286 |
| MNT      | 0.5285 | 1.8921 | 0.3147 | 0.8877 | 0.014296 |
| UBE2NL   | 0.5311 | 1.8829 | 0.3174 | 0.8887 | 0.014327 |
| HMX2     | 0.5289 | 1.8908 | 0.3150 | 0.8881 | 0.014336 |
| ANO6     | 1.9015 | 0.5259 | 1.1268 | 3.2088 | 0.014352 |
| POLE3    | 0.5316 | 1.8812 | 0.3178 | 0.8892 | 0.014398 |
| SCG2     | 1.8889 | 0.5294 | 1.1250 | 3.1718 | 0.014436 |
| TRAFD1   | 0.5294 | 1.8890 | 0.3153 | 0.8889 | 0.014461 |
| CYP2W1   | 0.5288 | 1.8911 | 0.3145 | 0.8889 | 0.01447  |
| GCHFR    | 0.5324 | 1.8784 | 0.3185 | 0.8899 | 0.014522 |
| LMF2     | 0.5309 | 1.8834 | 0.3169 | 0.8897 | 0.014527 |
| SIVA1    | 0.5266 | 1.8989 | 0.3122 | 0.8883 | 0.014562 |
| EGF      | 1.9099 | 0.5236 | 1.1260 | 3.2396 | 0.014579 |
| ANO9     | 0.5296 | 1.8883 | 0.3151 | 0.8901 | 0.014615 |
| EIF4E3   | 0.5297 | 1.8879 | 0.3153 | 0.8897 | 0.014621 |
| PILRA    | 0.5361 | 1.8652 | 0.3224 | 0.8917 | 0.014647 |
| CXCR6    | 0.5344 | 1.8711 | 0.3205 | 0.8911 | 0.014662 |
| BFSP2    | 0.5266 | 1.8991 | 0.3118 | 0.8893 | 0.014694 |
| PMPCA    | 0.5280 | 1.8939 | 0.3133 | 0.8898 | 0.014736 |
| LRRN4    | 1.8970 | 0.5272 | 1.1239 | 3.2018 | 0.01474  |
| PRKCB    | 0.5306 | 1.8845 | 0.3160 | 0.8911 | 0.014874 |
| MR1      | 1.9395 | 0.5156 | 1.1270 | 3.3377 | 0.014882 |
| FREM1    | 0.5332 | 1.8754 | 0.3188 | 0.8918 | 0.014921 |

---

---

|          |        |        |        |        |          |
|----------|--------|--------|--------|--------|----------|
| NCF1B    | 0.5313 | 1.8822 | 0.3165 | 0.8919 | 0.01494  |
| ZNF174   | 0.5324 | 1.8782 | 0.3179 | 0.8918 | 0.014947 |
| GBAS     | 1.8795 | 0.5321 | 1.1212 | 3.1506 | 0.014966 |
| EGFR     | 1.9219 | 0.5203 | 1.1251 | 3.2829 | 0.014969 |
| SH3GL1   | 0.5275 | 1.8957 | 0.3125 | 0.8905 | 0.015017 |
| SULT1E1  | 0.5283 | 1.8928 | 0.3131 | 0.8915 | 0.015036 |
| FCER2    | 0.5328 | 1.8769 | 0.3181 | 0.8925 | 0.015047 |
| MRVI1    | 0.5274 | 1.8960 | 0.3122 | 0.8912 | 0.015074 |
| CXorf40B | 0.5357 | 1.8666 | 0.3211 | 0.8938 | 0.015132 |
| PTPN22   | 0.5314 | 1.8817 | 0.3164 | 0.8926 | 0.015158 |
| TIFAB    | 0.5355 | 1.8674 | 0.3209 | 0.8935 | 0.015166 |
| TRIOBP   | 0.5361 | 1.8654 | 0.3214 | 0.8940 | 0.01517  |
| NMNAT3   | 0.5323 | 1.8787 | 0.3171 | 0.8936 | 0.015224 |
| FANCE    | 0.5357 | 1.8666 | 0.3210 | 0.8940 | 0.015264 |
| SPOP     | 0.5343 | 1.8717 | 0.3193 | 0.8941 | 0.015326 |
| ACTN3    | 1.9045 | 0.5251 | 1.1212 | 3.2349 | 0.015381 |
| MEST     | 1.8789 | 0.5322 | 1.1184 | 3.1565 | 0.015427 |
| EFNA1    | 1.8647 | 0.5363 | 1.1174 | 3.1120 | 0.015467 |
| PDCD1    | 0.5326 | 1.8776 | 0.3171 | 0.8945 | 0.015496 |
| CASQ1    | 0.5372 | 1.8616 | 0.3221 | 0.8957 | 0.015535 |
| TMOD3    | 1.8781 | 0.5325 | 1.1174 | 3.1567 | 0.015564 |
| AIF1     | 0.5354 | 1.8677 | 0.3201 | 0.8957 | 0.015585 |
| OTUD5    | 0.5367 | 1.8632 | 0.3216 | 0.8957 | 0.015609 |
| THEMIS   | 0.5354 | 1.8678 | 0.3200 | 0.8957 | 0.015623 |
| ABCG4    | 1.8629 | 0.5368 | 1.1160 | 3.1097 | 0.015625 |
| CLEC4A   | 0.5376 | 1.8600 | 0.3225 | 0.8963 | 0.01563  |
| MYO1F    | 0.5360 | 1.8658 | 0.3205 | 0.8961 | 0.015674 |
| MYO1A    | 0.5380 | 1.8587 | 0.3228 | 0.8968 | 0.015693 |
| C8G      | 0.5347 | 1.8701 | 0.3191 | 0.8959 | 0.01571  |
| PCYOX1   | 1.8871 | 0.5299 | 1.1172 | 3.1876 | 0.015801 |
| PLLP     | 0.5335 | 1.8744 | 0.3176 | 0.8963 | 0.015879 |
| STAP2    | 0.5308 | 1.8840 | 0.3145 | 0.8958 | 0.0159   |
| DBF4     | 0.5372 | 1.8613 | 0.3216 | 0.8975 | 0.015912 |
| SIRPG    | 0.5383 | 1.8577 | 0.3227 | 0.8979 | 0.015934 |
| CD28     | 0.5357 | 1.8668 | 0.3199 | 0.8971 | 0.015935 |
| NDUFA11  | 0.5328 | 1.8767 | 0.3168 | 0.8963 | 0.01594  |
| CXCL9    | 0.5381 | 1.8585 | 0.3226 | 0.8975 | 0.015943 |
| RUFY4    | 0.5382 | 1.8582 | 0.3225 | 0.8979 | 0.015955 |
| PFKM     | 1.8948 | 0.5278 | 1.1162 | 3.2165 | 0.016023 |
| CXorf40A | 0.5398 | 1.8525 | 0.3242 | 0.8988 | 0.016026 |
| CCL23    | 0.5341 | 1.8722 | 0.3180 | 0.8970 | 0.016043 |
| C16orf93 | 0.5282 | 1.8933 | 0.3113 | 0.8961 | 0.016044 |
| RPUSD1   | 0.5284 | 1.8926 | 0.3115 | 0.8962 | 0.016049 |
| PRKACA   | 0.5363 | 1.8647 | 0.3203 | 0.8979 | 0.016071 |

---

---

|               |        |        |        |        |          |
|---------------|--------|--------|--------|--------|----------|
| CPSF3L        | 0.5327 | 1.8774 | 0.3162 | 0.8974 | 0.016082 |
| BRD7          | 0.5393 | 1.8542 | 0.3236 | 0.8989 | 0.016103 |
| RAB3B         | 1.8714 | 0.5344 | 1.1138 | 3.1441 | 0.016119 |
| JMJD5         | 0.5335 | 1.8744 | 0.3170 | 0.8978 | 0.016119 |
| SASH3         | 0.5371 | 1.8618 | 0.3211 | 0.8984 | 0.016142 |
| TNN           | 0.5372 | 1.8614 | 0.3212 | 0.8986 | 0.016172 |
| FNBP1         | 0.5365 | 1.8639 | 0.3204 | 0.8984 | 0.016197 |
| NBPF15        | 1.8712 | 0.5344 | 1.1136 | 3.1442 | 0.016204 |
| KLHL6         | 0.5380 | 1.8588 | 0.3218 | 0.8995 | 0.016272 |
| RERGL         | 0.5366 | 1.8634 | 0.3205 | 0.8986 | 0.016281 |
| CCNH          | 0.5317 | 1.8809 | 0.3149 | 0.8975 | 0.016291 |
| CLTC          | 1.8711 | 0.5344 | 1.1129 | 3.1461 | 0.016341 |
| CCL17         | 0.5283 | 1.8927 | 0.3110 | 0.8975 | 0.016343 |
| GPR172B       | 0.5373 | 1.8611 | 0.3209 | 0.8998 | 0.016354 |
| BAIAP2L1      | 1.8689 | 0.5351 | 1.1127 | 3.1390 | 0.016383 |
| BLOC1S1       | 0.5291 | 1.8899 | 0.3118 | 0.8978 | 0.016432 |
| SIGLEC1       | 0.5426 | 1.8430 | 0.3267 | 0.9011 | 0.016433 |
| DKFZp566F0947 | 1.8951 | 0.5277 | 1.1140 | 3.2240 | 0.016469 |
| ZNF134        | 1.8569 | 0.5385 | 1.1106 | 3.1047 | 0.016484 |
| CYTIP         | 0.5358 | 1.8663 | 0.3191 | 0.8998 | 0.016533 |
| C10orf95      | 0.5364 | 1.8644 | 0.3194 | 0.9006 | 0.016577 |
| VCAM1         | 0.5359 | 1.8660 | 0.3191 | 0.9001 | 0.016588 |
| ANKRD20A3     | 0.5386 | 1.8566 | 0.3220 | 0.9010 | 0.016588 |
| GLUD1         | 0.5409 | 1.8489 | 0.3246 | 0.9011 | 0.016605 |
| SULT4A1       | 1.8487 | 0.5409 | 1.1086 | 3.0827 | 0.016745 |
| PPP1CC        | 0.5389 | 1.8556 | 0.3222 | 0.9015 | 0.016764 |
| CD200R1       | 0.5393 | 1.8544 | 0.3223 | 0.9021 | 0.01683  |
| DHFR          | 0.5337 | 1.8737 | 0.3163 | 0.9006 | 0.016887 |
| ZCCHC18       | 0.5393 | 1.8541 | 0.3224 | 0.9023 | 0.016911 |
| P4HA2         | 1.8551 | 0.5391 | 1.1083 | 3.1052 | 0.01695  |
| A2M           | 0.5340 | 1.8725 | 0.3164 | 0.9013 | 0.01697  |
| MYO10         | 1.8634 | 0.5367 | 1.1087 | 3.1319 | 0.017007 |
| NHEJ1         | 0.5380 | 1.8589 | 0.3209 | 0.9020 | 0.017015 |
| PLK2          | 1.8642 | 0.5364 | 1.1082 | 3.1360 | 0.017028 |
| SERP1         | 0.5405 | 1.8501 | 0.3236 | 0.9029 | 0.017032 |
| PLEKHA9       | 1.8552 | 0.5390 | 1.1076 | 3.1074 | 0.017058 |
| DCLRE1C       | 0.5440 | 1.8383 | 0.3272 | 0.9043 | 0.017065 |
| UMODL1        | 0.5397 | 1.8529 | 0.3226 | 0.9029 | 0.017075 |
| LYZ           | 0.5425 | 1.8433 | 0.3256 | 0.9038 | 0.017095 |
| PIP4K2A       | 0.5392 | 1.8544 | 0.3220 | 0.9030 | 0.017122 |
| TTC36         | 1.8467 | 0.5415 | 1.1070 | 3.0805 | 0.017123 |
| CALML4        | 0.5399 | 1.8523 | 0.3226 | 0.9035 | 0.017188 |
| ZNF266        | 0.5397 | 1.8529 | 0.3225 | 0.9032 | 0.017206 |
| FERMT3        | 0.5425 | 1.8432 | 0.3254 | 0.9045 | 0.017271 |

---

---

|           |        |        |        |        |          |
|-----------|--------|--------|--------|--------|----------|
| ANAPC5    | 0.5427 | 1.8427 | 0.3255 | 0.9049 | 0.017289 |
| ARHGEF19  | 0.5383 | 1.8578 | 0.3204 | 0.9044 | 0.017383 |
| NETO1     | 1.8601 | 0.5376 | 1.1071 | 3.1253 | 0.01742  |
| EFS       | 0.5377 | 1.8597 | 0.3197 | 0.9043 | 0.017441 |
| TXNDC2    | 1.8673 | 0.5355 | 1.1066 | 3.1510 | 0.017499 |
| CDIPT     | 0.5435 | 1.8400 | 0.3260 | 0.9062 | 0.017503 |
| PIR       | 0.5380 | 1.8586 | 0.3201 | 0.9045 | 0.017516 |
| LDHC      | 0.5432 | 1.8409 | 0.3258 | 0.9057 | 0.017526 |
| IDO2      | 0.5385 | 1.8571 | 0.3205 | 0.9047 | 0.017541 |
| ADORA1    | 1.8486 | 0.5409 | 1.1053 | 3.0919 | 0.017543 |
| COQ10A    | 0.5378 | 1.8593 | 0.3198 | 0.9044 | 0.017551 |
| CXCL3     | 1.8435 | 0.5424 | 1.1038 | 3.0790 | 0.017594 |
| MTHFD1    | 0.5440 | 1.8384 | 0.3265 | 0.9062 | 0.017616 |
| LEPR      | 1.8667 | 0.5357 | 1.1055 | 3.1522 | 0.01764  |
| TSKS      | 0.5384 | 1.8574 | 0.3202 | 0.9051 | 0.017643 |
| INSM1     | 0.5429 | 1.8420 | 0.3253 | 0.9061 | 0.017654 |
| ABHD11    | 0.5394 | 1.8539 | 0.3215 | 0.9049 | 0.017665 |
| MYOM1     | 0.5416 | 1.8464 | 0.3237 | 0.9063 | 0.017766 |
| SCARNA10  | 0.5396 | 1.8532 | 0.3216 | 0.9055 | 0.017775 |
| CENPM     | 0.5406 | 1.8497 | 0.3227 | 0.9059 | 0.017789 |
| NUDT1     | 0.5378 | 1.8593 | 0.3194 | 0.9057 | 0.017802 |
| NRP1      | 1.8492 | 0.5408 | 1.1034 | 3.0992 | 0.017809 |
| CD79A     | 0.5422 | 1.8444 | 0.3241 | 0.9070 | 0.017841 |
| ZNF776    | 1.8355 | 0.5448 | 1.1021 | 3.0570 | 0.017843 |
| SDR16C5   | 0.5362 | 1.8649 | 0.3175 | 0.9055 | 0.017865 |
| HSP90AB2P | 1.8745 | 0.5335 | 1.1049 | 3.1801 | 0.017871 |
| LENG8     | 1.8446 | 0.5421 | 1.1027 | 3.0856 | 0.01789  |
| TAB1      | 0.5432 | 1.8408 | 0.3253 | 0.9071 | 0.01789  |
| CNBP      | 0.5439 | 1.8385 | 0.3260 | 0.9074 | 0.017922 |
| CD8A      | 0.5401 | 1.8516 | 0.3217 | 0.9068 | 0.017949 |
| MGC16703  | 0.5397 | 1.8528 | 0.3213 | 0.9066 | 0.017962 |
| GMFB      | 1.8727 | 0.5340 | 1.1035 | 3.1781 | 0.018022 |
| 10-Sep    | 1.8625 | 0.5369 | 1.1032 | 3.1442 | 0.018041 |
| PCDHGB1   | 1.8745 | 0.5335 | 1.1040 | 3.1827 | 0.01807  |
| GPR120    | 0.5447 | 1.8359 | 0.3267 | 0.9082 | 0.018075 |
| CAMK2N2   | 0.5443 | 1.8373 | 0.3262 | 0.9083 | 0.018079 |
| SNHG9     | 0.5338 | 1.8733 | 0.3144 | 0.9063 | 0.018118 |
| F8        | 0.5403 | 1.8507 | 0.3216 | 0.9078 | 0.018124 |
| CPLX1     | 1.8507 | 0.5403 | 1.1019 | 3.1084 | 0.018147 |
| C21orf56  | 1.8482 | 0.5411 | 1.1020 | 3.0996 | 0.018165 |
| UMPS      | 0.5465 | 1.8299 | 0.3284 | 0.9092 | 0.018178 |
| KRT36     | 0.5431 | 1.8412 | 0.3249 | 0.9080 | 0.018206 |
| PPIF      | 0.5398 | 1.8525 | 0.3211 | 0.9076 | 0.018217 |
| TIMELESS  | 0.5469 | 1.8284 | 0.3289 | 0.9096 | 0.018233 |

---

---

|          |        |        |        |        |          |
|----------|--------|--------|--------|--------|----------|
| ZNF557   | 0.5419 | 1.8453 | 0.3233 | 0.9083 | 0.018291 |
| FURIN    | 1.8506 | 0.5404 | 1.1011 | 3.1104 | 0.018296 |
| WDR62    | 0.5433 | 1.8407 | 0.3248 | 0.9088 | 0.018318 |
| CKLF     | 0.5423 | 1.8441 | 0.3235 | 0.9090 | 0.018366 |
| CLDN12   | 1.8602 | 0.5376 | 1.1012 | 3.1425 | 0.018373 |
| OFD1     | 0.5407 | 1.8495 | 0.3219 | 0.9083 | 0.018396 |
| NTSR1    | 1.8580 | 0.5382 | 1.1007 | 3.1366 | 0.018459 |
| FOXO3    | 1.8826 | 0.5312 | 1.1024 | 3.2150 | 0.01848  |
| ACAD9    | 0.5412 | 1.8477 | 0.3220 | 0.9096 | 0.018538 |
| HEXIM2   | 0.5353 | 1.8680 | 0.3155 | 0.9084 | 0.018573 |
| SCUBE1   | 0.5445 | 1.8366 | 0.3257 | 0.9102 | 0.018618 |
| CD37     | 0.5463 | 1.8305 | 0.3276 | 0.9110 | 0.018668 |
| APLN     | 1.8562 | 0.5387 | 1.0995 | 3.1335 | 0.018694 |
| KISS1R   | 1.8543 | 0.5393 | 1.0990 | 3.1288 | 0.018789 |
| C16orf5  | 0.5453 | 1.8338 | 0.3262 | 0.9116 | 0.018812 |
| CD247    | 0.5449 | 1.8352 | 0.3258 | 0.9114 | 0.018822 |
| ZFAND2B  | 0.5361 | 1.8654 | 0.3159 | 0.9097 | 0.018857 |
| TRMU     | 0.5427 | 1.8425 | 0.3234 | 0.9108 | 0.018879 |
| MBOAT1   | 0.5418 | 1.8457 | 0.3223 | 0.9108 | 0.018942 |
| BEAN     | 1.8274 | 0.5472 | 1.0962 | 3.0462 | 0.018984 |
| PINX1    | 0.5420 | 1.8449 | 0.3225 | 0.9110 | 0.019019 |
| PDE6B    | 0.5432 | 1.8411 | 0.3235 | 0.9118 | 0.019032 |
| SPSB3    | 0.5432 | 1.8408 | 0.3234 | 0.9124 | 0.019066 |
| CRYGS    | 0.5405 | 1.8503 | 0.3203 | 0.9119 | 0.019079 |
| CP110    | 0.5489 | 1.8217 | 0.3301 | 0.9130 | 0.019089 |
| PCDHGC3  | 1.8471 | 0.5414 | 1.0973 | 3.1095 | 0.019103 |
| SLC25A45 | 0.5456 | 1.8328 | 0.3261 | 0.9129 | 0.019127 |
| ETV7     | 0.5480 | 1.8248 | 0.3288 | 0.9133 | 0.019188 |
| GJB4     | 0.5459 | 1.8318 | 0.3264 | 0.9131 | 0.019191 |
| C17orf99 | 0.5453 | 1.8338 | 0.3258 | 0.9127 | 0.019233 |
| PCDHGB2  | 1.8613 | 0.5373 | 1.0971 | 3.1579 | 0.019283 |
| APEX2    | 0.5439 | 1.8386 | 0.3239 | 0.9133 | 0.019301 |
| CCDC60   | 0.5464 | 1.8301 | 0.3268 | 0.9136 | 0.019319 |
| ABCA17P  | 0.5446 | 1.8361 | 0.3248 | 0.9132 | 0.019356 |
| CD80     | 0.5485 | 1.8231 | 0.3291 | 0.9142 | 0.01937  |
| ITGB1    | 1.8389 | 0.5438 | 1.0947 | 3.0888 | 0.0194   |
| TMEM150B | 0.5500 | 1.8181 | 0.3307 | 0.9146 | 0.01942  |
| STXBP5   | 1.8783 | 0.5324 | 1.0976 | 3.2145 | 0.019449 |
| SULT1A1  | 0.5442 | 1.8375 | 0.3241 | 0.9139 | 0.01949  |
| GJA1     | 1.8230 | 0.5486 | 1.0930 | 3.0404 | 0.019527 |
| TSEN54   | 0.5451 | 1.8346 | 0.3250 | 0.9142 | 0.019534 |
| TNPO2    | 0.5447 | 1.8360 | 0.3245 | 0.9142 | 0.019582 |
| NBPF10   | 1.8602 | 0.5376 | 1.0951 | 3.1601 | 0.019689 |
| ZNF860   | 1.8301 | 0.5464 | 1.0929 | 3.0645 | 0.019712 |

---



---

|           |        |        |        |        |          |
|-----------|--------|--------|--------|--------|----------|
| SFI1      | 0.5498 | 1.8190 | 0.3299 | 0.9160 | 0.019727 |
| HP        | 1.8357 | 0.5447 | 1.0928 | 3.0836 | 0.019787 |
| HEATR4    | 0.5478 | 1.8255 | 0.3278 | 0.9154 | 0.019803 |
| SETD1A    | 0.5480 | 1.8248 | 0.3277 | 0.9164 | 0.019949 |
| FLT3LG    | 0.5474 | 1.8267 | 0.3270 | 0.9164 | 0.019952 |
| MUC4      | 0.5489 | 1.8219 | 0.3287 | 0.9165 | 0.019961 |
| ITGAV     | 1.8255 | 0.5478 | 1.0910 | 3.0545 | 0.019971 |
| GLRX3     | 0.5457 | 1.8324 | 0.3250 | 0.9164 | 0.020055 |
| IDI1      | 1.8417 | 0.5430 | 1.0919 | 3.1064 | 0.020069 |
| H2AFZ     | 0.5442 | 1.8376 | 0.3234 | 0.9157 | 0.020082 |
| RILPL2    | 0.5506 | 1.8162 | 0.3303 | 0.9178 | 0.020134 |
| FARS2     | 0.5470 | 1.8281 | 0.3264 | 0.9168 | 0.020137 |
| CCL19     | 0.5481 | 1.8244 | 0.3276 | 0.9172 | 0.020141 |
| LOC93622  | 0.5387 | 1.8565 | 0.3170 | 0.9154 | 0.020171 |
| TNFAIP3   | 1.8324 | 0.5457 | 1.0907 | 3.0785 | 0.02018  |
| KIAA0802  | 1.8217 | 0.5489 | 1.0905 | 3.0432 | 0.020183 |
| HTR7      | 1.8262 | 0.5476 | 1.0904 | 3.0586 | 0.020193 |
| MAP2K2    | 0.5453 | 1.8338 | 0.3243 | 0.9169 | 0.020224 |
| HIST1H2BE | 0.5484 | 1.8235 | 0.3277 | 0.9176 | 0.02028  |
| C16orf59  | 0.5481 | 1.8245 | 0.3273 | 0.9177 | 0.020339 |
| AGBL3     | 0.5395 | 1.8536 | 0.3176 | 0.9164 | 0.020346 |
| NFAM1     | 0.5509 | 1.8153 | 0.3304 | 0.9185 | 0.02038  |
| MTMR1     | 0.5515 | 1.8133 | 0.3311 | 0.9185 | 0.0204   |
| UCP2      | 0.5510 | 1.8149 | 0.3304 | 0.9189 | 0.020447 |
| MORN3     | 0.5488 | 1.8220 | 0.3279 | 0.9187 | 0.020511 |
| CRTAC1    | 1.8173 | 0.5503 | 1.0883 | 3.0345 | 0.020517 |
| CLNK      | 0.5470 | 1.8281 | 0.3256 | 0.9190 | 0.020598 |
| ACVR2A    | 0.5500 | 1.8183 | 0.3292 | 0.9188 | 0.020606 |
| MRPS25    | 0.5466 | 1.8295 | 0.3251 | 0.9190 | 0.020674 |
| DNPEP     | 0.5514 | 1.8135 | 0.3307 | 0.9196 | 0.02068  |
| CABC1     | 0.5498 | 1.8188 | 0.3286 | 0.9200 | 0.020691 |
| DDX17     | 0.5495 | 1.8197 | 0.3284 | 0.9196 | 0.020762 |
| CELF2     | 0.5500 | 1.8183 | 0.3288 | 0.9198 | 0.020771 |
| N4BP2L1   | 0.5493 | 1.8204 | 0.3281 | 0.9196 | 0.020784 |
| RAD1      | 0.5494 | 1.8203 | 0.3281 | 0.9198 | 0.020827 |
| MAP3K7    | 1.8468 | 0.5415 | 1.0884 | 3.1336 | 0.020847 |
| MAGIX     | 0.5508 | 1.8154 | 0.3297 | 0.9202 | 0.02085  |
| RREB1     | 1.8468 | 0.5415 | 1.0885 | 3.1333 | 0.020897 |
| C18orf10  | 0.5475 | 1.8264 | 0.3260 | 0.9196 | 0.020916 |
| TTC30B    | 1.8347 | 0.5450 | 1.0869 | 3.0969 | 0.020937 |
| KLRB1     | 0.5482 | 1.8242 | 0.3265 | 0.9205 | 0.021048 |
| NUP88     | 0.5507 | 1.8160 | 0.3293 | 0.9210 | 0.021093 |
| CHIC2     | 0.5481 | 1.8245 | 0.3262 | 0.9209 | 0.02112  |
| RPS26P11  | 0.5519 | 1.8118 | 0.3306 | 0.9213 | 0.021141 |

---

---

|           |        |        |        |        |          |
|-----------|--------|--------|--------|--------|----------|
| MAST4     | 1.8361 | 0.5446 | 1.0868 | 3.1022 | 0.021158 |
| HIST1H3F  | 0.5517 | 1.8126 | 0.3303 | 0.9214 | 0.021194 |
| ADH7      | 0.5478 | 1.8254 | 0.3259 | 0.9207 | 0.021195 |
| KCNA3     | 0.5513 | 1.8138 | 0.3297 | 0.9220 | 0.021215 |
| NASP      | 0.5505 | 1.8165 | 0.3288 | 0.9217 | 0.021231 |
| SLU7      | 0.5449 | 1.8353 | 0.3224 | 0.9207 | 0.021239 |
| PRPS2     | 0.5499 | 1.8186 | 0.3281 | 0.9216 | 0.021291 |
| SH2D4B    | 0.5528 | 1.8091 | 0.3313 | 0.9222 | 0.021305 |
| FLJ40330  | 0.5516 | 1.8128 | 0.3299 | 0.9224 | 0.021316 |
| RPL13AP3  | 0.5495 | 1.8198 | 0.3276 | 0.9218 | 0.021328 |
| LYPD5     | 0.5535 | 1.8068 | 0.3321 | 0.9223 | 0.021335 |
| TNFRSF12A | 1.8310 | 0.5461 | 1.0850 | 3.0899 | 0.021348 |
| KCNA5     | 0.5510 | 1.8147 | 0.3293 | 0.9222 | 0.021366 |
| NGFR      | 0.5491 | 1.8212 | 0.3272 | 0.9216 | 0.021373 |
| TMEM45B   | 0.5456 | 1.8329 | 0.3230 | 0.9215 | 0.021386 |
| NARF      | 0.5512 | 1.8141 | 0.3293 | 0.9228 | 0.021441 |
| GATM      | 0.5520 | 1.8116 | 0.3301 | 0.9231 | 0.021493 |
| PON2      | 1.8251 | 0.5479 | 1.0843 | 3.0720 | 0.021531 |
| PDK1      | 1.8131 | 0.5515 | 1.0837 | 3.0337 | 0.021546 |
| RENBP     | 0.5544 | 1.8038 | 0.3327 | 0.9239 | 0.021567 |
| CPT1B     | 0.5509 | 1.8151 | 0.3289 | 0.9228 | 0.021595 |
| SMPD3     | 0.5520 | 1.8117 | 0.3298 | 0.9236 | 0.021648 |
| SLA       | 0.5557 | 1.7995 | 0.3342 | 0.9240 | 0.021653 |
| FAM53B    | 0.5496 | 1.8194 | 0.3272 | 0.9234 | 0.021658 |
| LOC646982 | 1.8219 | 0.5489 | 1.0833 | 3.0638 | 0.021661 |
| RABL2B    | 0.5532 | 1.8076 | 0.3315 | 0.9233 | 0.021662 |
| FANCB     | 0.5538 | 1.8056 | 0.3320 | 0.9238 | 0.021679 |
| P4HA3     | 1.8184 | 0.5499 | 1.0830 | 3.0532 | 0.021694 |
| SCARA3    | 0.5533 | 1.8074 | 0.3314 | 0.9236 | 0.021717 |
| RRN3P1    | 0.5540 | 1.8050 | 0.3321 | 0.9241 | 0.021718 |
| ASAP1     | 1.8527 | 0.5397 | 1.0851 | 3.1636 | 0.021738 |
| ERLEC1    | 1.8253 | 0.5479 | 1.0840 | 3.0736 | 0.021738 |
| MYH16     | 1.8389 | 0.5438 | 1.0838 | 3.1200 | 0.021769 |
| EXOSC7    | 0.5519 | 1.8119 | 0.3297 | 0.9238 | 0.02178  |
| REEP4     | 0.5491 | 1.8211 | 0.3264 | 0.9238 | 0.021819 |
| TAS1R1    | 0.5472 | 1.8276 | 0.3242 | 0.9234 | 0.021951 |
| SEZ6L2    | 1.8184 | 0.5499 | 1.0822 | 3.0552 | 0.021954 |
| C11orf90  | 1.8171 | 0.5503 | 1.0817 | 3.0524 | 0.021964 |
| HOXA5     | 1.8153 | 0.5509 | 1.0820 | 3.0455 | 0.021988 |
| DPYSL2    | 0.5523 | 1.8106 | 0.3299 | 0.9247 | 0.021988 |
| CCDC144A  | 1.8294 | 0.5466 | 1.0827 | 3.0913 | 0.021997 |
| PCDHB3    | 1.8031 | 0.5546 | 1.0808 | 3.0080 | 0.022049 |
| MRPL2     | 0.5537 | 1.8060 | 0.3314 | 0.9250 | 0.022062 |
| TMEM55A   | 1.8127 | 0.5517 | 1.0813 | 3.0387 | 0.022066 |

---

---

|           |        |        |        |        |          |
|-----------|--------|--------|--------|--------|----------|
| RTN4R     | 1.8266 | 0.5475 | 1.0824 | 3.0825 | 0.022069 |
| POU2F1    | 0.5509 | 1.8151 | 0.3281 | 0.9251 | 0.022083 |
| PRRG1     | 1.8169 | 0.5504 | 1.0814 | 3.0529 | 0.022139 |
| LOC151174 | 0.5558 | 1.7991 | 0.3336 | 0.9261 | 0.022186 |
| MEGF10    | 1.8183 | 0.5500 | 1.0812 | 3.0581 | 0.022203 |
| TBC1D10C  | 0.5539 | 1.8054 | 0.3313 | 0.9261 | 0.022261 |
| LAT       | 0.5507 | 1.8159 | 0.3277 | 0.9255 | 0.022274 |
| C14orf169 | 0.5525 | 1.8098 | 0.3298 | 0.9259 | 0.022276 |
| LMBRD1    | 1.8157 | 0.5507 | 1.0802 | 3.0521 | 0.022303 |
| FKBP10    | 1.8176 | 0.5502 | 1.0808 | 3.0567 | 0.022308 |
| UBL4A     | 0.5539 | 1.8055 | 0.3312 | 0.9263 | 0.022314 |
| CITED1    | 0.5529 | 1.8086 | 0.3304 | 0.9253 | 0.022315 |
| IL17RB    | 0.5487 | 1.8226 | 0.3252 | 0.9255 | 0.022349 |
| AGTRAP    | 1.8352 | 0.5449 | 1.0823 | 3.1117 | 0.022364 |
| TK1       | 0.5531 | 1.8081 | 0.3304 | 0.9257 | 0.022375 |
| SEC24A    | 1.8074 | 0.5533 | 1.0795 | 3.0261 | 0.02242  |
| LPHN2     | 1.7988 | 0.5559 | 1.0787 | 2.9995 | 0.022465 |
| SFRS1     | 0.5523 | 1.8108 | 0.3294 | 0.9258 | 0.022481 |
| LASS4     | 0.5503 | 1.8170 | 0.3269 | 0.9264 | 0.022508 |
| LAX1      | 0.5564 | 1.7973 | 0.3338 | 0.9275 | 0.022512 |
| RGS5      | 0.5518 | 1.8124 | 0.3285 | 0.9266 | 0.022559 |
| TRIM56    | 1.8350 | 0.5450 | 1.0805 | 3.1163 | 0.022572 |
| GRK4      | 1.7962 | 0.5567 | 1.0778 | 2.9934 | 0.022707 |
| IGSF10    | 1.8213 | 0.5490 | 1.0787 | 3.0753 | 0.02274  |
| TFDP2     | 0.5585 | 1.7904 | 0.3358 | 0.9291 | 0.022915 |
| RARRES3   | 0.5551 | 1.8014 | 0.3319 | 0.9285 | 0.022916 |
| GAD1      | 0.5552 | 1.8011 | 0.3320 | 0.9287 | 0.022928 |
| GPR18     | 0.5551 | 1.8015 | 0.3319 | 0.9285 | 0.022928 |
| EPM2AIP1  | 0.5524 | 1.8104 | 0.3288 | 0.9278 | 0.022948 |
| RASAL3    | 0.5568 | 1.7960 | 0.3338 | 0.9289 | 0.022951 |
| DNASE1L2  | 0.5516 | 1.8130 | 0.3278 | 0.9280 | 0.022958 |
| FOXL1     | 1.7949 | 0.5571 | 1.0767 | 2.9919 | 0.022996 |
| WDR81     | 0.5558 | 1.7990 | 0.3324 | 0.9295 | 0.023049 |
| KCNMB1    | 0.5573 | 1.7942 | 0.3343 | 0.9292 | 0.023121 |
| LDHD      | 0.5575 | 1.7937 | 0.3343 | 0.9297 | 0.023122 |
| POPDC2    | 0.5550 | 1.8019 | 0.3315 | 0.9289 | 0.023154 |
| P2RX1     | 0.5560 | 1.7986 | 0.3324 | 0.9299 | 0.023164 |
| HSD3B7    | 0.5534 | 1.8069 | 0.3296 | 0.9294 | 0.023167 |
| TFAP2C    | 0.5576 | 1.7934 | 0.3343 | 0.9301 | 0.023195 |
| AMPD3     | 0.5568 | 1.7961 | 0.3335 | 0.9296 | 0.023202 |
| GALNT9    | 0.5580 | 1.7923 | 0.3347 | 0.9301 | 0.023241 |
| VIPR2     | 0.5506 | 1.8163 | 0.3264 | 0.9288 | 0.023276 |
| CNTD1     | 0.5576 | 1.7935 | 0.3342 | 0.9302 | 0.023306 |
| ENDOD1    | 1.7905 | 0.5585 | 1.0749 | 2.9826 | 0.023308 |

---

---

|               |        |        |        |        |          |
|---------------|--------|--------|--------|--------|----------|
| SRC           | 0.5551 | 1.8016 | 0.3313 | 0.9301 | 0.023343 |
| TMEM155       | 0.5562 | 1.7978 | 0.3326 | 0.9302 | 0.023344 |
| CBS           | 0.5583 | 1.7912 | 0.3349 | 0.9308 | 0.023396 |
| CAMKV         | 0.5507 | 1.8157 | 0.3264 | 0.9292 | 0.023408 |
| DSG2          | 1.8142 | 0.5512 | 1.0753 | 3.0610 | 0.023443 |
| LOC284578     | 0.5535 | 1.8067 | 0.3294 | 0.9300 | 0.023508 |
| DSTYK         | 1.8016 | 0.5551 | 1.0747 | 3.0200 | 0.023527 |
| PCDHB17       | 1.7992 | 0.5558 | 1.0746 | 3.0121 | 0.023543 |
| RBMS3         | 1.7981 | 0.5561 | 1.0738 | 3.0112 | 0.023594 |
| LOC645431     | 0.5523 | 1.8106 | 0.3279 | 0.9302 | 0.023624 |
| CHST7         | 0.5547 | 1.8028 | 0.3306 | 0.9306 | 0.023651 |
| C10orf54      | 0.5558 | 1.7993 | 0.3318 | 0.9309 | 0.02367  |
| LOC150786     | 1.8056 | 0.5538 | 1.0741 | 3.0353 | 0.023727 |
| ZC3H11A       | 1.7952 | 0.5570 | 1.0734 | 3.0023 | 0.023732 |
| SERPINB4      | 1.8030 | 0.5546 | 1.0739 | 3.0271 | 0.023757 |
| LRRC56        | 0.5559 | 1.7989 | 0.3316 | 0.9318 | 0.023771 |
| PTX3          | 1.8046 | 0.5541 | 1.0732 | 3.0345 | 0.023821 |
| SPPL2B        | 0.5575 | 1.7937 | 0.3335 | 0.9321 | 0.023863 |
| C15orf62      | 0.5594 | 1.7877 | 0.3354 | 0.9329 | 0.023891 |
| FAM73A        | 1.8352 | 0.5449 | 1.0747 | 3.1339 | 0.02395  |
| CD300E        | 1.8051 | 0.5540 | 1.0731 | 3.0363 | 0.02398  |
| RPSAP9        | 0.5566 | 1.7967 | 0.3323 | 0.9323 | 0.023996 |
| TCAM1P        | 0.5577 | 1.7931 | 0.3335 | 0.9327 | 0.024017 |
| ECSIT         | 0.5591 | 1.7886 | 0.3350 | 0.9332 | 0.024043 |
| HSPBAP1       | 0.5597 | 1.7868 | 0.3356 | 0.9335 | 0.024062 |
| VPS29         | 0.5560 | 1.7986 | 0.3316 | 0.9323 | 0.024118 |
| ZNF623        | 1.7941 | 0.5574 | 1.0718 | 3.0032 | 0.024137 |
| ERO1LB        | 0.5555 | 1.8002 | 0.3308 | 0.9329 | 0.024184 |
| C10orf116     | 0.5567 | 1.7962 | 0.3322 | 0.9329 | 0.024201 |
| C11orf93      | 0.5610 | 1.7824 | 0.3368 | 0.9345 | 0.024333 |
| UBE2Q2P1      | 1.8080 | 0.5531 | 1.0714 | 3.0510 | 0.024405 |
| TSC22D4       | 0.5602 | 1.7852 | 0.3358 | 0.9343 | 0.024409 |
| 15-Sep        | 1.8116 | 0.5520 | 1.0714 | 3.0634 | 0.024468 |
| PLOD1         | 1.7796 | 0.5619 | 1.0695 | 2.9614 | 0.024477 |
| B3GALNT1      | 0.5625 | 1.7778 | 0.3383 | 0.9353 | 0.024515 |
| SLC29A3       | 0.5581 | 1.7917 | 0.3336 | 0.9339 | 0.024543 |
| PSMD12        | 1.7975 | 0.5563 | 1.0700 | 3.0196 | 0.024555 |
| IL12B         | 0.5572 | 1.7946 | 0.3323 | 0.9342 | 0.024559 |
| ADAM6         | 0.5593 | 1.7881 | 0.3344 | 0.9352 | 0.024573 |
| PATL2         | 0.5537 | 1.8060 | 0.3282 | 0.9340 | 0.024583 |
| JMJD7-PLA2G4B | 0.5530 | 1.8083 | 0.3274 | 0.9341 | 0.024596 |
| CCDC146       | 0.5593 | 1.7879 | 0.3345 | 0.9352 | 0.024676 |
| STC1          | 1.7873 | 0.5595 | 1.0690 | 2.9883 | 0.02471  |
| CN5H6.4       | 0.5622 | 1.7788 | 0.3378 | 0.9355 | 0.024726 |

---

---

|              |        |        |        |        |          |
|--------------|--------|--------|--------|--------|----------|
| ESM1         | 1.7955 | 0.5569 | 1.0693 | 3.0148 | 0.024735 |
| MGC12982     | 0.5609 | 1.7829 | 0.3361 | 0.9361 | 0.024767 |
| KCNG2        | 1.7904 | 0.5585 | 1.0693 | 2.9977 | 0.024783 |
| ADAMTS5      | 1.7774 | 0.5626 | 1.0683 | 2.9572 | 0.024791 |
| ASRGL1       | 0.5595 | 1.7873 | 0.3346 | 0.9357 | 0.024826 |
| SCD          | 1.7850 | 0.5602 | 1.0684 | 2.9824 | 0.02493  |
| TSIX         | 0.5550 | 1.8019 | 0.3293 | 0.9353 | 0.024974 |
| ERN1         | 1.8155 | 0.5508 | 1.0695 | 3.0820 | 0.025017 |
| MSH6         | 0.5615 | 1.7810 | 0.3365 | 0.9368 | 0.025032 |
| IRAK2        | 0.5577 | 1.7931 | 0.3321 | 0.9365 | 0.025058 |
| MC1R         | 1.7790 | 0.5621 | 1.0670 | 2.9661 | 0.025068 |
| MFAP3L       | 1.7816 | 0.5613 | 1.0674 | 2.9736 | 0.025093 |
| TMEM126A     | 0.5596 | 1.7870 | 0.3345 | 0.9363 | 0.025098 |
| LOC100302640 | 1.7972 | 0.5564 | 1.0682 | 3.0237 | 0.025133 |
| CPNE6        | 0.5639 | 1.7733 | 0.3391 | 0.9377 | 0.025171 |
| SCARB2       | 1.7909 | 0.5584 | 1.0680 | 3.0033 | 0.025198 |
| GRIP2        | 0.5578 | 1.7926 | 0.3323 | 0.9364 | 0.0252   |
| GLI3         | 1.7856 | 0.5601 | 1.0669 | 2.9883 | 0.025225 |
| OR5K2        | 0.5571 | 1.7951 | 0.3315 | 0.9362 | 0.025252 |
| CNIH4        | 1.7845 | 0.5604 | 1.0671 | 2.9842 | 0.025291 |
| ZSCAN12P1    | 1.8018 | 0.5550 | 1.0674 | 3.0414 | 0.025294 |
| MRPL28       | 0.5612 | 1.7818 | 0.3360 | 0.9374 | 0.025321 |
| BTBD19       | 1.7950 | 0.5571 | 1.0669 | 3.0201 | 0.02537  |
| TMEM90B      | 1.7864 | 0.5598 | 1.0664 | 2.9925 | 0.025373 |
| ASMTL        | 0.5611 | 1.7821 | 0.3358 | 0.9377 | 0.025411 |
| KPNA3        | 1.7934 | 0.5576 | 1.0659 | 3.0175 | 0.02553  |
| MRPL47       | 0.5614 | 1.7813 | 0.3360 | 0.9380 | 0.025538 |
| CPT1A        | 0.5596 | 1.7869 | 0.3338 | 0.9382 | 0.025538 |
| CAGE1        | 1.8004 | 0.5554 | 1.0670 | 3.0381 | 0.02554  |
| SLC25A17     | 0.5627 | 1.7772 | 0.3375 | 0.9380 | 0.025544 |
| GAS2L1       | 0.5589 | 1.7894 | 0.3330 | 0.9378 | 0.02555  |
| HADH         | 0.5624 | 1.7782 | 0.3368 | 0.9391 | 0.025604 |
| PARP14       | 0.5633 | 1.7752 | 0.3380 | 0.9388 | 0.025613 |
| ZNF281       | 1.7900 | 0.5586 | 1.0656 | 3.0069 | 0.025686 |
| FAM103A1     | 0.5613 | 1.7814 | 0.3356 | 0.9388 | 0.0257   |
| SPP1         | 1.7919 | 0.5581 | 1.0656 | 3.0131 | 0.025701 |
| FAHD2A       | 0.5631 | 1.7758 | 0.3376 | 0.9393 | 0.025744 |
| TM2D1        | 1.8009 | 0.5553 | 1.0659 | 3.0428 | 0.025777 |
| PCDHGA10     | 1.7787 | 0.5622 | 1.0648 | 2.9714 | 0.025782 |
| ARHGAP23     | 0.5653 | 1.7691 | 0.3400 | 0.9397 | 0.025787 |
| UQCRC1       | 0.5516 | 1.8130 | 0.3244 | 0.9377 | 0.025807 |
| C19orf38     | 0.5584 | 1.7909 | 0.3321 | 0.9388 | 0.025813 |
| ZFP36L2      | 1.7746 | 0.5635 | 1.0643 | 2.9590 | 0.025816 |
| ZDHHC4       | 1.7987 | 0.5560 | 1.0651 | 3.0374 | 0.025818 |

---

---

|           |        |        |        |        |          |
|-----------|--------|--------|--------|--------|----------|
| CYP4B1    | 0.5614 | 1.7813 | 0.3356 | 0.9391 | 0.025837 |
| HLF       | 0.5624 | 1.7782 | 0.3365 | 0.9399 | 0.025921 |
| SYCP2     | 0.5628 | 1.7767 | 0.3371 | 0.9398 | 0.025935 |
| RPS6KL1   | 0.5567 | 1.7963 | 0.3300 | 0.9392 | 0.025952 |
| CCDC136   | 0.5594 | 1.7878 | 0.3330 | 0.9395 | 0.025954 |
| PCDHGA2   | 1.7790 | 0.5621 | 1.0632 | 2.9767 | 0.026044 |
| LRRFIP2   | 0.5591 | 1.7886 | 0.3327 | 0.9394 | 0.026064 |
| PFKP      | 1.7799 | 0.5618 | 1.0639 | 2.9777 | 0.026118 |
| PARP15    | 0.5642 | 1.7724 | 0.3384 | 0.9406 | 0.026139 |
| CX3CL1    | 0.5626 | 1.7776 | 0.3365 | 0.9406 | 0.02614  |
| ETFB      | 0.5653 | 1.7689 | 0.3397 | 0.9407 | 0.026147 |
| TAF9B     | 0.5636 | 1.7742 | 0.3378 | 0.9404 | 0.026171 |
| ARMC7     | 0.5644 | 1.7719 | 0.3384 | 0.9412 | 0.026197 |
| PZP       | 0.5595 | 1.7872 | 0.3330 | 0.9402 | 0.026209 |
| TFCP2     | 1.8050 | 0.5540 | 1.0638 | 3.0628 | 0.026278 |
| MRPL4     | 0.5602 | 1.7852 | 0.3336 | 0.9405 | 0.026333 |
| FADD      | 1.7960 | 0.5568 | 1.0638 | 3.0321 | 0.026345 |
| LRMP      | 0.5634 | 1.7748 | 0.3373 | 0.9411 | 0.026364 |
| CD19      | 0.5631 | 1.7759 | 0.3367 | 0.9418 | 0.026407 |
| TGFBI     | 1.7833 | 0.5607 | 1.0621 | 2.9943 | 0.026418 |
| SEC61G    | 1.7770 | 0.5628 | 1.0620 | 2.9734 | 0.026435 |
| SLC25A5   | 0.5637 | 1.7739 | 0.3375 | 0.9416 | 0.026458 |
| POLA1     | 0.5634 | 1.7749 | 0.3372 | 0.9414 | 0.02649  |
| UGT2B15   | 0.5634 | 1.7750 | 0.3371 | 0.9415 | 0.026545 |
| LOC647288 | 1.7932 | 0.5577 | 1.0624 | 3.0268 | 0.02656  |
| NCKAP5    | 1.7751 | 0.5633 | 1.0610 | 2.9699 | 0.026585 |
| CCDC48    | 0.5656 | 1.7682 | 0.3393 | 0.9427 | 0.0266   |
| CUZD1     | 0.5648 | 1.7704 | 0.3384 | 0.9428 | 0.026624 |
| PTPN7     | 0.5662 | 1.7662 | 0.3401 | 0.9424 | 0.026645 |
| NCKAP1    | 1.7846 | 0.5604 | 1.0615 | 3.0001 | 0.026662 |
| LRAT      | 1.7772 | 0.5627 | 1.0617 | 2.9750 | 0.02667  |
| RAB37     | 0.5669 | 1.7641 | 0.3408 | 0.9429 | 0.026671 |
| FOXN1     | 0.5610 | 1.7824 | 0.3341 | 0.9420 | 0.026697 |
| ZDHHC3    | 0.5601 | 1.7853 | 0.3331 | 0.9418 | 0.026707 |
| NUS1      | 1.7814 | 0.5614 | 1.0608 | 2.9914 | 0.026713 |
| C17orf66  | 0.5606 | 1.7839 | 0.3335 | 0.9421 | 0.02676  |
| RAB36     | 0.5635 | 1.7747 | 0.3369 | 0.9423 | 0.026778 |
| C16orf42  | 0.5633 | 1.7753 | 0.3365 | 0.9429 | 0.026816 |
| NEIL2     | 0.5614 | 1.7814 | 0.3343 | 0.9425 | 0.026831 |
| DYNC1I2   | 1.7827 | 0.5610 | 1.0607 | 2.9959 | 0.026848 |
| ZNF292    | 1.8019 | 0.5550 | 1.0617 | 3.0581 | 0.026875 |
| CHCHD1    | 0.5608 | 1.7831 | 0.3335 | 0.9431 | 0.026962 |
| ZNF57     | 0.5645 | 1.7714 | 0.3379 | 0.9432 | 0.026995 |
| ADARB2    | 0.5588 | 1.7895 | 0.3312 | 0.9427 | 0.02704  |

---

---

|           |        |        |        |        |          |
|-----------|--------|--------|--------|--------|----------|
| HNFA4     | 0.5620 | 1.7794 | 0.3348 | 0.9433 | 0.027052 |
| HEXDC     | 0.5662 | 1.7661 | 0.3395 | 0.9444 | 0.027169 |
| REM1      | 0.5621 | 1.7790 | 0.3348 | 0.9438 | 0.027189 |
| TDP2      | 0.5646 | 1.7712 | 0.3376 | 0.9443 | 0.027207 |
| FXD1      | 0.5654 | 1.7687 | 0.3386 | 0.9441 | 0.027209 |
| VBP1      | 0.5643 | 1.7722 | 0.3372 | 0.9441 | 0.027239 |
| FOXRED2   | 0.5667 | 1.7645 | 0.3400 | 0.9448 | 0.027325 |
| SLC15A3   | 0.5655 | 1.7683 | 0.3385 | 0.9447 | 0.027346 |
| C20orf197 | 0.5691 | 1.7573 | 0.3425 | 0.9454 | 0.027411 |
| DDX49     | 0.5650 | 1.7699 | 0.3379 | 0.9448 | 0.027413 |
| C9orf139  | 0.5673 | 1.7627 | 0.3404 | 0.9454 | 0.027431 |
| IL22RA2   | 0.5663 | 1.7659 | 0.3394 | 0.9449 | 0.027459 |
| SPOCK2    | 0.5683 | 1.7597 | 0.3416 | 0.9453 | 0.027462 |
| HSD17B10  | 0.5654 | 1.7686 | 0.3384 | 0.9447 | 0.02748  |
| TMEM173   | 0.5631 | 1.7760 | 0.3354 | 0.9454 | 0.027492 |
| ZNF548    | 1.7757 | 0.5632 | 1.0579 | 2.9806 | 0.027535 |
| PDGFC     | 1.7761 | 0.5630 | 1.0576 | 2.9826 | 0.027536 |
| LOC283070 | 0.5659 | 1.7670 | 0.3388 | 0.9452 | 0.027549 |
| FAM98C    | 0.5654 | 1.7685 | 0.3380 | 0.9460 | 0.027599 |
| SLC6A11   | 1.7960 | 0.5568 | 1.0585 | 3.0473 | 0.027697 |
| DHCR7     | 1.7867 | 0.5597 | 1.0581 | 3.0170 | 0.027707 |
| ZNF285    | 1.7589 | 0.5686 | 1.0571 | 2.9265 | 0.027708 |
| TLX2      | 0.5635 | 1.7745 | 0.3357 | 0.9461 | 0.027734 |
| RGL4      | 0.5667 | 1.7645 | 0.3395 | 0.9460 | 0.027762 |
| NPY6R     | 0.5652 | 1.7694 | 0.3378 | 0.9457 | 0.027776 |
| RNF39     | 0.5677 | 1.7614 | 0.3405 | 0.9466 | 0.027839 |
| CRYBA4    | 0.5673 | 1.7627 | 0.3400 | 0.9466 | 0.027947 |
| SCXB      | 1.7603 | 0.5681 | 1.0563 | 2.9335 | 0.027991 |
| CCDC28A   | 0.5660 | 1.7669 | 0.3384 | 0.9465 | 0.027992 |
| GTF2IRD2B | 0.5658 | 1.7673 | 0.3382 | 0.9467 | 0.028    |
| GIMAP5    | 0.5696 | 1.7555 | 0.3426 | 0.9473 | 0.028041 |
| PER3      | 0.5664 | 1.7656 | 0.3387 | 0.9471 | 0.028057 |
| PPP1R14A  | 1.7665 | 0.5661 | 1.0557 | 2.9559 | 0.028062 |
| TSFM      | 0.5670 | 1.7636 | 0.3394 | 0.9473 | 0.028088 |
| TREM2     | 0.5707 | 1.7524 | 0.3437 | 0.9476 | 0.028094 |
| CDC45     | 0.5670 | 1.7636 | 0.3395 | 0.9469 | 0.02811  |
| TNFAIP1   | 1.7682 | 0.5655 | 1.0558 | 2.9613 | 0.028123 |
| SNRNP40   | 0.5658 | 1.7676 | 0.3380 | 0.9470 | 0.028144 |
| DAZL      | 0.5665 | 1.7652 | 0.3387 | 0.9476 | 0.028146 |
| KIAA0748  | 0.5686 | 1.7586 | 0.3412 | 0.9476 | 0.028183 |
| PCDHGB4   | 1.7654 | 0.5665 | 1.0554 | 2.9528 | 0.028209 |
| COL5A1    | 1.7596 | 0.5683 | 1.0549 | 2.9350 | 0.028213 |
| RGS9      | 0.5667 | 1.7646 | 0.3389 | 0.9477 | 0.028223 |
| LRRC39    | 1.7736 | 0.5638 | 1.0557 | 2.9797 | 0.028263 |

---

---

|           |        |        |        |        |          |
|-----------|--------|--------|--------|--------|----------|
| SPAG8     | 0.5661 | 1.7666 | 0.3383 | 0.9473 | 0.028267 |
| SUSD5     | 1.7648 | 0.5667 | 1.0548 | 2.9525 | 0.028337 |
| C6orf147  | 0.5668 | 1.7643 | 0.3389 | 0.9478 | 0.028353 |
| FRAT2     | 0.5694 | 1.7561 | 0.3417 | 0.9490 | 0.028405 |
| BCM01     | 0.5690 | 1.7575 | 0.3414 | 0.9484 | 0.028445 |
| C5        | 0.5689 | 1.7578 | 0.3410 | 0.9490 | 0.028502 |
| LOC401127 | 0.5638 | 1.7738 | 0.3352 | 0.9482 | 0.028509 |
| DDIT4     | 1.7647 | 0.5667 | 1.0542 | 2.9539 | 0.028524 |
| SFXN5     | 0.5693 | 1.7566 | 0.3415 | 0.9489 | 0.028533 |
| ZNF232    | 0.5677 | 1.7615 | 0.3397 | 0.9487 | 0.028578 |
| LOC440563 | 0.5666 | 1.7649 | 0.3385 | 0.9484 | 0.028606 |
| RAB26     | 0.5669 | 1.7638 | 0.3387 | 0.9490 | 0.028652 |
| IFT172    | 0.5639 | 1.7733 | 0.3352 | 0.9486 | 0.028705 |
| LNX2      | 1.7681 | 0.5656 | 1.0537 | 2.9670 | 0.028808 |
| FLJ45244  | 0.5680 | 1.7605 | 0.3396 | 0.9501 | 0.02883  |
| HINT3     | 1.7795 | 0.5620 | 1.0539 | 3.0046 | 0.028837 |
| RASGEF1B  | 0.5705 | 1.7529 | 0.3427 | 0.9498 | 0.02885  |
| HTR3A     | 0.5702 | 1.7539 | 0.3421 | 0.9503 | 0.028861 |
| SELP      | 0.5719 | 1.7484 | 0.3442 | 0.9504 | 0.028923 |
| ZNF438    | 0.5716 | 1.7495 | 0.3437 | 0.9505 | 0.028948 |
| PCNA      | 0.5679 | 1.7609 | 0.3395 | 0.9499 | 0.02895  |
| SLC45A3   | 1.7608 | 0.5679 | 1.0521 | 2.9466 | 0.029044 |
| LIMD2     | 0.5696 | 1.7558 | 0.3412 | 0.9508 | 0.029056 |
| RNF113A   | 0.5703 | 1.7534 | 0.3420 | 0.9510 | 0.029085 |
| OCLM      | 1.7612 | 0.5678 | 1.0523 | 2.9478 | 0.029109 |
| SLC6A16   | 0.5685 | 1.7592 | 0.3400 | 0.9504 | 0.029147 |
| WDFY4     | 0.5682 | 1.7600 | 0.3396 | 0.9506 | 0.029176 |
| OBFC1     | 0.5706 | 1.7526 | 0.3423 | 0.9512 | 0.029178 |
| SAP30BP   | 0.5706 | 1.7526 | 0.3422 | 0.9513 | 0.029215 |
| MYBPC2    | 0.5649 | 1.7703 | 0.3358 | 0.9503 | 0.029216 |
| ACER1     | 0.5703 | 1.7534 | 0.3419 | 0.9512 | 0.029259 |
| GPR172A   | 1.7545 | 0.5700 | 1.0515 | 2.9275 | 0.029265 |
| RDH11     | 1.7507 | 0.5712 | 1.0513 | 2.9154 | 0.029303 |
| GCDH      | 0.5724 | 1.7471 | 0.3441 | 0.9520 | 0.029323 |
| NUDT16    | 0.5732 | 1.7445 | 0.3452 | 0.9518 | 0.029328 |
| DBN1      | 1.7536 | 0.5703 | 1.0515 | 2.9245 | 0.029343 |
| ANKRD24   | 0.5696 | 1.7555 | 0.3412 | 0.9511 | 0.029354 |
| C22orf31  | 0.5668 | 1.7643 | 0.3378 | 0.9511 | 0.029404 |
| CTAGE9    | 1.7646 | 0.5667 | 1.0509 | 2.9633 | 0.029405 |
| HAPLN3    | 0.5658 | 1.7673 | 0.3367 | 0.9509 | 0.029424 |
| RPL39     | 0.5645 | 1.7714 | 0.3351 | 0.9510 | 0.029448 |
| NUP50     | 0.5721 | 1.7480 | 0.3439 | 0.9518 | 0.02949  |
| C14orf19  | 0.5667 | 1.7644 | 0.3378 | 0.9509 | 0.029553 |
| DMRTA1    | 0.5675 | 1.7620 | 0.3385 | 0.9516 | 0.029561 |

---



---

|           |        |        |        |        |          |
|-----------|--------|--------|--------|--------|----------|
| RAB6B     | 1.7507 | 0.5712 | 1.0500 | 2.9190 | 0.029563 |
| PLAC1     | 1.7842 | 0.5605 | 1.0517 | 3.0269 | 0.029591 |
| C6orf41   | 0.5666 | 1.7648 | 0.3372 | 0.9523 | 0.029687 |
| ROCK2     | 1.7656 | 0.5664 | 1.0505 | 2.9678 | 0.029693 |
| ZNF2      | 0.5695 | 1.7558 | 0.3404 | 0.9528 | 0.029755 |
| CDK5RAP2  | 0.5701 | 1.7540 | 0.3411 | 0.9530 | 0.029808 |
| C22orf32  | 0.5693 | 1.7565 | 0.3402 | 0.9526 | 0.02981  |
| TTC25     | 0.5670 | 1.7637 | 0.3376 | 0.9522 | 0.029814 |
| CLVS1     | 1.7556 | 0.5696 | 1.0496 | 2.9365 | 0.029825 |
| SH2D1A    | 0.5716 | 1.7496 | 0.3427 | 0.9532 | 0.029852 |
| TCEAL2    | 0.5716 | 1.7495 | 0.3428 | 0.9531 | 0.02986  |
| RPL7L1    | 1.7707 | 0.5648 | 1.0496 | 2.9871 | 0.029878 |
| LOC341056 | 0.5704 | 1.7532 | 0.3415 | 0.9527 | 0.029927 |
| ARMCX1    | 1.7493 | 0.5716 | 1.0489 | 2.9176 | 0.029945 |
| CD1A      | 0.5712 | 1.7508 | 0.3422 | 0.9532 | 0.029957 |
| NFYC      | 0.5696 | 1.7557 | 0.3403 | 0.9533 | 0.029973 |
| TRAPPC2   | 0.5680 | 1.7605 | 0.3386 | 0.9529 | 0.02998  |
| PM20D1    | 0.5717 | 1.7492 | 0.3428 | 0.9533 | 0.030009 |
| TYRP1     | 1.7508 | 0.5712 | 1.0487 | 2.9229 | 0.030054 |
| LOC284441 | 1.7825 | 0.5610 | 1.0498 | 3.0266 | 0.030059 |
| EHBP1     | 1.7621 | 0.5675 | 1.0487 | 2.9609 | 0.030082 |
| ASTN1     | 0.5721 | 1.7478 | 0.3432 | 0.9539 | 0.030133 |
| SLC4A5    | 0.5699 | 1.7548 | 0.3405 | 0.9537 | 0.030139 |
| ATG5      | 1.7924 | 0.5579 | 1.0494 | 3.0615 | 0.030165 |
| ARHGAP15  | 0.5700 | 1.7544 | 0.3407 | 0.9538 | 0.030168 |
| FGFR2     | 0.5710 | 1.7514 | 0.3417 | 0.9541 | 0.030223 |
| AKR7L     | 0.5707 | 1.7524 | 0.3412 | 0.9544 | 0.030283 |
| DDX39     | 0.5696 | 1.7555 | 0.3401 | 0.9542 | 0.030344 |
| DNASE1L3  | 0.5652 | 1.7694 | 0.3351 | 0.9532 | 0.030362 |
| RBBP7     | 0.5730 | 1.7453 | 0.3438 | 0.9550 | 0.030417 |
| MRS2P2    | 0.5723 | 1.7472 | 0.3431 | 0.9548 | 0.030417 |
| LONRF1    | 0.5698 | 1.7551 | 0.3402 | 0.9543 | 0.030484 |
| SLC48A1   | 0.5732 | 1.7447 | 0.3437 | 0.9558 | 0.030597 |
| PSMD10    | 0.5724 | 1.7472 | 0.3429 | 0.9552 | 0.030604 |
| AGFG2     | 0.5733 | 1.7444 | 0.3440 | 0.9554 | 0.030614 |
| BCAS4     | 0.5739 | 1.7425 | 0.3447 | 0.9554 | 0.030628 |
| ZXDC      | 0.5751 | 1.7387 | 0.3460 | 0.9560 | 0.030639 |
| POLE2     | 0.5718 | 1.7490 | 0.3423 | 0.9550 | 0.030641 |
| RAB33A    | 0.5719 | 1.7484 | 0.3421 | 0.9562 | 0.030862 |
| FAM106C   | 1.7583 | 0.5687 | 1.0463 | 2.9549 | 0.03087  |
| RNF125    | 0.5715 | 1.7499 | 0.3415 | 0.9563 | 0.030878 |
| AKAP8     | 0.5751 | 1.7388 | 0.3458 | 0.9566 | 0.030925 |
| TBL3      | 0.5719 | 1.7487 | 0.3419 | 0.9566 | 0.030956 |
| RUNDC3A   | 1.7470 | 0.5724 | 1.0457 | 2.9186 | 0.030966 |

---

---

|          |         |         |         |         |           |
|----------|---------|---------|---------|---------|-----------|
| PSIMCT-1 | 1. 7766 | 0. 5629 | 1. 0465 | 3. 0163 | 0. 030988 |
| TMEM22   | 1. 7579 | 0. 5689 | 1. 0458 | 2. 9549 | 0. 030989 |
| RALY     | 0. 5740 | 1. 7420 | 0. 3444 | 0. 9568 | 0. 031033 |
| COR01C   | 0. 5718 | 1. 7488 | 0. 3421 | 0. 9558 | 0. 031037 |
| TP73     | 0. 5752 | 1. 7387 | 0. 3457 | 0. 9568 | 0. 031049 |
| CLEC3B   | 0. 5695 | 1. 7559 | 0. 3392 | 0. 9563 | 0. 031061 |
| TES      | 1. 7737 | 0. 5638 | 1. 0454 | 3. 0095 | 0. 03107  |
| KLF2     | 0. 5691 | 1. 7572 | 0. 3387 | 0. 9561 | 0. 031081 |
| WDR90    | 0. 5737 | 1. 7431 | 0. 3440 | 0. 9568 | 0. 031101 |
| FAM83F   | 0. 5726 | 1. 7465 | 0. 3426 | 0. 9568 | 0. 03111  |
| SRRT     | 0. 5727 | 1. 7462 | 0. 3427 | 0. 9569 | 0. 031193 |
| FLJ22536 | 1. 7470 | 0. 5724 | 1. 0448 | 2. 9213 | 0. 031217 |
| SEMA5B   | 1. 7452 | 0. 5730 | 1. 0448 | 2. 9151 | 0. 031247 |
| LIME1    | 0. 5719 | 1. 7485 | 0. 3418 | 0. 9570 | 0. 031256 |
| TIGD1    | 0. 5670 | 1. 7638 | 0. 3359 | 0. 9570 | 0. 031287 |
| HERPUD2  | 1. 7410 | 0. 5744 | 1. 0444 | 2. 9023 | 0. 031298 |
| C19orf55 | 1. 7555 | 0. 5696 | 1. 0447 | 2. 9498 | 0. 03133  |
| P2RX6    | 1. 7420 | 0. 5741 | 1. 0446 | 2. 9050 | 0. 031353 |
| PLP1     | 0. 5743 | 1. 7414 | 0. 3444 | 0. 9577 | 0. 031367 |
| CLECL1   | 0. 5725 | 1. 7468 | 0. 3422 | 0. 9578 | 0. 031368 |
| SPON1    | 1. 7435 | 0. 5736 | 1. 0438 | 2. 9124 | 0. 031456 |
| TOX4     | 0. 5789 | 1. 7274 | 0. 3496 | 0. 9585 | 0. 031459 |
| ULK3     | 0. 5720 | 1. 7482 | 0. 3415 | 0. 9582 | 0. 031493 |
| CTLA4    | 0. 5746 | 1. 7403 | 0. 3445 | 0. 9584 | 0. 031551 |
| NSUN6    | 0. 5714 | 1. 7502 | 0. 3407 | 0. 9581 | 0. 031552 |
| SPN      | 0. 5750 | 1. 7390 | 0. 3450 | 0. 9584 | 0. 031566 |
| MLLT1    | 0. 5750 | 1. 7390 | 0. 3449 | 0. 9587 | 0. 031578 |
| RGS13    | 0. 5678 | 1. 7613 | 0. 3365 | 0. 9580 | 0. 031651 |
| ABCB1    | 0. 5769 | 1. 7334 | 0. 3471 | 0. 9588 | 0. 031664 |
| PTTG2    | 0. 5716 | 1. 7495 | 0. 3410 | 0. 9581 | 0. 031686 |
| INPP1    | 0. 5754 | 1. 7379 | 0. 3452 | 0. 9591 | 0. 031717 |
| TRIM54   | 0. 5748 | 1. 7398 | 0. 3445 | 0. 9588 | 0. 03176  |
| EFR3A    | 1. 7522 | 0. 5707 | 1. 0432 | 2. 9433 | 0. 031781 |
| C5AR1    | 0. 5769 | 1. 7333 | 0. 3469 | 0. 9594 | 0. 031864 |
| TRIM69   | 0. 5734 | 1. 7439 | 0. 3428 | 0. 9591 | 0. 031869 |
| PM20D2   | 1. 7689 | 0. 5653 | 1. 0429 | 3. 0006 | 0. 031907 |
| ADAMTS15 | 1. 7382 | 0. 5753 | 1. 0419 | 2. 8998 | 0. 031971 |
| PPP1R2P1 | 0. 5714 | 1. 7500 | 0. 3404 | 0. 9593 | 0. 031973 |
| KLRC2    | 0. 5714 | 1. 7500 | 0. 3402 | 0. 9597 | 0. 031976 |
| CUX2     | 0. 5733 | 1. 7442 | 0. 3426 | 0. 9595 | 0. 032015 |
| PRDM4    | 1. 7511 | 0. 5711 | 1. 0423 | 2. 9418 | 0. 032049 |
| PPM1N    | 0. 5755 | 1. 7375 | 0. 3450 | 0. 9601 | 0. 032093 |
| PWP2     | 1. 7519 | 0. 5708 | 1. 0423 | 2. 9444 | 0. 032121 |
| PVR      | 1. 7587 | 0. 5686 | 1. 0421 | 2. 9683 | 0. 032137 |

---

---

|              |        |        |        |        |          |
|--------------|--------|--------|--------|--------|----------|
| C6orf227     | 1.7435 | 0.5736 | 1.0415 | 2.9187 | 0.032152 |
| EGLN3        | 1.7438 | 0.5735 | 1.0418 | 2.9188 | 0.032158 |
| SLC23A1      | 0.5732 | 1.7447 | 0.3423 | 0.9597 | 0.03217  |
| LRP5         | 1.7585 | 0.5687 | 1.0422 | 2.9671 | 0.032182 |
| HOMEZ        | 1.7692 | 0.5652 | 1.0426 | 3.0019 | 0.032183 |
| NDUFB1       | 0.5732 | 1.7444 | 0.3423 | 0.9600 | 0.032199 |
| APOLD1       | 0.5742 | 1.7417 | 0.3433 | 0.9601 | 0.032201 |
| FLJ36031     | 1.7526 | 0.5706 | 1.0414 | 2.9493 | 0.032227 |
| ITGAL        | 0.5775 | 1.7317 | 0.3472 | 0.9604 | 0.032229 |
| EVI2B        | 0.5740 | 1.7423 | 0.3431 | 0.9602 | 0.032244 |
| SLC30A6      | 1.7691 | 0.5653 | 1.0421 | 3.0032 | 0.03226  |
| IRF4         | 0.5789 | 1.7273 | 0.3488 | 0.9611 | 0.032324 |
| IRF8         | 0.5762 | 1.7354 | 0.3456 | 0.9608 | 0.032405 |
| SAPS2        | 0.5780 | 1.7300 | 0.3477 | 0.9609 | 0.03241  |
| COX6A1       | 0.5730 | 1.7452 | 0.3417 | 0.9608 | 0.032414 |
| FBXL4        | 1.7575 | 0.5690 | 1.0410 | 2.9669 | 0.032499 |
| SEMA6B       | 1.7498 | 0.5715 | 1.0408 | 2.9417 | 0.032629 |
| ZNF671       | 0.5747 | 1.7402 | 0.3434 | 0.9617 | 0.032642 |
| CDC14A       | 0.5765 | 1.7347 | 0.3456 | 0.9615 | 0.032644 |
| NDUFA12      | 0.5788 | 1.7277 | 0.3483 | 0.9619 | 0.032659 |
| RFNG         | 0.5747 | 1.7399 | 0.3434 | 0.9618 | 0.032689 |
| LOC100271836 | 1.7552 | 0.5697 | 1.0402 | 2.9616 | 0.032734 |
| ZDHHC18      | 0.5746 | 1.7402 | 0.3434 | 0.9616 | 0.032748 |
| C7orf59      | 0.5765 | 1.7346 | 0.3454 | 0.9622 | 0.03279  |
| EAPP         | 0.5767 | 1.7339 | 0.3458 | 0.9618 | 0.0328   |
| TCEB2        | 0.5696 | 1.7556 | 0.3373 | 0.9619 | 0.032858 |
| LOC162632    | 1.7448 | 0.5731 | 1.0393 | 2.9291 | 0.03288  |
| ZBTB32       | 0.5786 | 1.7282 | 0.3478 | 0.9626 | 0.032929 |
| ST8SIA4      | 0.5756 | 1.7373 | 0.3443 | 0.9625 | 0.032986 |
| LDLRAD3      | 1.7535 | 0.5703 | 1.0393 | 2.9584 | 0.033007 |
| TBCCD1       | 0.5788 | 1.7277 | 0.3478 | 0.9633 | 0.033066 |
| RNASE6       | 0.5791 | 1.7267 | 0.3483 | 0.9629 | 0.033091 |
| SLC25A11     | 0.5755 | 1.7377 | 0.3439 | 0.9630 | 0.033098 |
| MSL3         | 0.5796 | 1.7252 | 0.3487 | 0.9635 | 0.033146 |
| BCL2         | 0.5788 | 1.7277 | 0.3478 | 0.9632 | 0.033149 |
| ADORA3       | 0.5793 | 1.7262 | 0.3484 | 0.9634 | 0.033236 |
| LEPROT       | 1.7536 | 0.5703 | 1.0386 | 2.9608 | 0.033258 |
| ADORA2B      | 0.5724 | 1.7469 | 0.3404 | 0.9626 | 0.033285 |
| GRM7         | 0.5754 | 1.7380 | 0.3438 | 0.9630 | 0.033317 |
| SLAIN1       | 0.5734 | 1.7439 | 0.3414 | 0.9633 | 0.033346 |
| GDPD3        | 0.5705 | 1.7529 | 0.3378 | 0.9634 | 0.033437 |
| MYO9B        | 0.5782 | 1.7294 | 0.3468 | 0.9643 | 0.033469 |
| TAX1BP3      | 0.5680 | 1.7607 | 0.3347 | 0.9638 | 0.033519 |
| PLBD2        | 1.7521 | 0.5707 | 1.0376 | 2.9588 | 0.033529 |

---

---

|              |        |        |        |        |          |
|--------------|--------|--------|--------|--------|----------|
| RPL32P3      | 0.5801 | 1.7238 | 0.3489 | 0.9646 | 0.033562 |
| KIAA0776     | 1.7414 | 0.5742 | 1.0368 | 2.9249 | 0.033621 |
| LAPTM5       | 0.5754 | 1.7380 | 0.3433 | 0.9642 | 0.033663 |
| GABRR2       | 1.7507 | 0.5712 | 1.0372 | 2.9550 | 0.033666 |
| GPR113       | 0.5790 | 1.7271 | 0.3476 | 0.9645 | 0.033689 |
| C11orf48     | 0.5776 | 1.7312 | 0.3458 | 0.9648 | 0.033724 |
| RPAIN        | 0.5767 | 1.7340 | 0.3447 | 0.9649 | 0.0338   |
| LILRP2       | 0.5771 | 1.7327 | 0.3451 | 0.9652 | 0.033848 |
| NDUFA2       | 0.5748 | 1.7397 | 0.3423 | 0.9653 | 0.033893 |
| ELK1         | 0.5798 | 1.7247 | 0.3483 | 0.9652 | 0.033934 |
| CORO2B       | 1.7264 | 0.5792 | 1.0359 | 2.8771 | 0.033934 |
| MEOX1        | 0.5792 | 1.7264 | 0.3474 | 0.9657 | 0.033939 |
| GPR144       | 0.5777 | 1.7311 | 0.3457 | 0.9653 | 0.033949 |
| ZNF582       | 0.5720 | 1.7482 | 0.3391 | 0.9650 | 0.033962 |
| GOLT1B       | 1.7349 | 0.5764 | 1.0358 | 2.9059 | 0.033968 |
| FNDC3B       | 1.7483 | 0.5720 | 1.0358 | 2.9506 | 0.033997 |
| TIGD3        | 0.5746 | 1.7405 | 0.3419 | 0.9657 | 0.034041 |
| LOC100216545 | 0.5743 | 1.7414 | 0.3416 | 0.9653 | 0.034048 |
| KCNF1        | 1.7243 | 0.5799 | 1.0355 | 2.8715 | 0.034057 |
| LOC100133545 | 1.7574 | 0.5690 | 1.0361 | 2.9808 | 0.034065 |
| CDH3         | 1.7224 | 0.5806 | 1.0353 | 2.8656 | 0.034075 |
| TPBG         | 1.7401 | 0.5747 | 1.0354 | 2.9245 | 0.034089 |
| AMICA1       | 0.5797 | 1.7249 | 0.3479 | 0.9661 | 0.03415  |
| IER3         | 1.7259 | 0.5794 | 1.0350 | 2.8782 | 0.034155 |
| C22orf40     | 0.5752 | 1.7385 | 0.3425 | 0.9660 | 0.034249 |
| TBP          | 1.7391 | 0.5750 | 1.0349 | 2.9225 | 0.034257 |
| ZYG11A       | 0.5803 | 1.7231 | 0.3485 | 0.9664 | 0.034261 |
| SYCP2L       | 1.7403 | 0.5746 | 1.0352 | 2.9257 | 0.034311 |
| EXOC5        | 1.7484 | 0.5720 | 1.0352 | 2.9527 | 0.034312 |
| UCHL5        | 1.7376 | 0.5755 | 1.0349 | 2.9175 | 0.034332 |
| TMEM186      | 0.5779 | 1.7304 | 0.3455 | 0.9667 | 0.034342 |
| USP35        | 1.7494 | 0.5716 | 1.0354 | 2.9558 | 0.034367 |
| RAB11FIP1    | 0.5795 | 1.7256 | 0.3473 | 0.9668 | 0.034372 |
| FUT5         | 0.5807 | 1.7220 | 0.3488 | 0.9668 | 0.034411 |
| S100B        | 0.5796 | 1.7253 | 0.3476 | 0.9666 | 0.034437 |
| AMY2A        | 0.5799 | 1.7245 | 0.3477 | 0.9671 | 0.034619 |
| DUSP2        | 0.5814 | 1.7200 | 0.3495 | 0.9671 | 0.034655 |
| HAUS8        | 0.5788 | 1.7277 | 0.3465 | 0.9669 | 0.03467  |
| ARGFXP2      | 1.7248 | 0.5798 | 1.0337 | 2.8779 | 0.034677 |
| NDUFB10      | 0.5759 | 1.7365 | 0.3428 | 0.9675 | 0.034681 |
| NDRG1        | 1.7291 | 0.5784 | 1.0338 | 2.8919 | 0.03471  |
| CYSLTR2      | 0.5823 | 1.7173 | 0.3504 | 0.9678 | 0.03474  |
| C17orf55     | 1.7183 | 0.5820 | 1.0337 | 2.8562 | 0.034749 |
| ADCY5        | 0.5762 | 1.7356 | 0.3431 | 0.9675 | 0.034761 |

---

---

|              |        |        |        |        |          |
|--------------|--------|--------|--------|--------|----------|
| NDUFS5       | 0.5736 | 1.7433 | 0.3400 | 0.9677 | 0.034773 |
| TNFRSF11B    | 1.7250 | 0.5797 | 1.0330 | 2.8806 | 0.034916 |
| CCL25        | 0.5779 | 1.7303 | 0.3450 | 0.9681 | 0.034946 |
| SOAT2        | 0.5805 | 1.7228 | 0.3479 | 0.9683 | 0.034956 |
| CRB2         | 0.5784 | 1.7290 | 0.3456 | 0.9679 | 0.034995 |
| KIAA1755     | 0.5805 | 1.7226 | 0.3480 | 0.9684 | 0.035013 |
| RNF167       | 0.5791 | 1.7267 | 0.3463 | 0.9684 | 0.035023 |
| INADL        | 1.7354 | 0.5762 | 1.0326 | 2.9166 | 0.035096 |
| SCGB1A1      | 0.5787 | 1.7281 | 0.3457 | 0.9686 | 0.035119 |
| SNX10        | 1.7273 | 0.5790 | 1.0317 | 2.8918 | 0.035174 |
| S100A4       | 0.5708 | 1.7518 | 0.3365 | 0.9685 | 0.035178 |
| YIPF6        | 1.7538 | 0.5702 | 1.0328 | 2.9781 | 0.035179 |
| DNAL1        | 0.5812 | 1.7204 | 0.3487 | 0.9689 | 0.0352   |
| FAM131B      | 0.5815 | 1.7198 | 0.3488 | 0.9693 | 0.035223 |
| BCS1L        | 0.5785 | 1.7286 | 0.3454 | 0.9690 | 0.035237 |
| TARSL2       | 0.5791 | 1.7270 | 0.3460 | 0.9690 | 0.035266 |
| MPV17L2      | 0.5805 | 1.7227 | 0.3478 | 0.9690 | 0.035266 |
| LGALS2       | 0.5831 | 1.7150 | 0.3506 | 0.9696 | 0.035375 |
| ZNF534       | 0.5827 | 1.7163 | 0.3502 | 0.9694 | 0.03538  |
| GDF15        | 0.5801 | 1.7239 | 0.3471 | 0.9693 | 0.035386 |
| DGKB         | 0.5828 | 1.7158 | 0.3504 | 0.9693 | 0.035422 |
| NGF          | 1.7251 | 0.5797 | 1.0313 | 2.8856 | 0.035425 |
| RBM10        | 0.5796 | 1.7254 | 0.3465 | 0.9694 | 0.035425 |
| FMNL3        | 0.5847 | 1.7104 | 0.3524 | 0.9700 | 0.035452 |
| FAM163A      | 1.7188 | 0.5818 | 1.0310 | 2.8654 | 0.035557 |
| CXorf42      | 0.5827 | 1.7162 | 0.3502 | 0.9696 | 0.03556  |
| FLJ90757     | 1.7206 | 0.5812 | 1.0311 | 2.8711 | 0.035566 |
| C1QB         | 0.5833 | 1.7145 | 0.3507 | 0.9702 | 0.035594 |
| LOC100303728 | 0.5835 | 1.7137 | 0.3508 | 0.9705 | 0.03565  |
| COL4A4       | 1.7194 | 0.5816 | 1.0306 | 2.8688 | 0.035658 |
| ADI1         | 0.5821 | 1.7178 | 0.3492 | 0.9704 | 0.035672 |
| TDRD7        | 0.5833 | 1.7143 | 0.3505 | 0.9707 | 0.035721 |
| IFNG         | 0.5774 | 1.7318 | 0.3438 | 0.9699 | 0.035731 |
| B3GALT4      | 0.5841 | 1.7121 | 0.3513 | 0.9710 | 0.035764 |
| RRN3P3       | 0.5843 | 1.7116 | 0.3515 | 0.9711 | 0.035821 |
| FABP7        | 0.5837 | 1.7131 | 0.3509 | 0.9711 | 0.035849 |
| SESN2        | 1.7393 | 0.5750 | 1.0304 | 2.9357 | 0.035878 |
| NCAN         | 0.5844 | 1.7110 | 0.3518 | 0.9711 | 0.035896 |
| RPL15        | 0.5775 | 1.7317 | 0.3435 | 0.9707 | 0.035942 |
| ALDH4A1      | 0.5800 | 1.7240 | 0.3464 | 0.9713 | 0.035958 |
| HIST1H2BD    | 0.5807 | 1.7220 | 0.3472 | 0.9714 | 0.036067 |
| TNFRSF1A     | 1.7331 | 0.5770 | 1.0303 | 2.9156 | 0.036086 |
| ZNF10        | 0.5816 | 1.7193 | 0.3482 | 0.9715 | 0.036088 |
| TUBB3        | 1.7151 | 0.5830 | 1.0289 | 2.8589 | 0.036088 |

---

---

|          |        |        |        |        |          |
|----------|--------|--------|--------|--------|----------|
| CXorf21  | 0.5828 | 1.7159 | 0.3496 | 0.9715 | 0.03612  |
| LRCH1    | 1.7302 | 0.5780 | 1.0289 | 2.9096 | 0.036153 |
| LMAN1    | 1.7168 | 0.5825 | 1.0285 | 2.8658 | 0.036233 |
| NUB1     | 0.5813 | 1.7203 | 0.3477 | 0.9718 | 0.036234 |
| FBXO30   | 1.7364 | 0.5759 | 1.0290 | 2.9302 | 0.036234 |
| TCTEX1D2 | 0.5809 | 1.7216 | 0.3473 | 0.9715 | 0.036273 |
| NROB1    | 0.5813 | 1.7202 | 0.3476 | 0.9722 | 0.036274 |
| TAF3     | 0.5858 | 1.7070 | 0.3530 | 0.9723 | 0.036284 |
| LRRC26   | 0.5826 | 1.7163 | 0.3492 | 0.9721 | 0.036292 |
| CCNO     | 0.5813 | 1.7204 | 0.3476 | 0.9720 | 0.036384 |
| KIAA0101 | 0.5822 | 1.7175 | 0.3488 | 0.9718 | 0.03647  |
| SUMF2    | 1.7359 | 0.5761 | 1.0289 | 2.9287 | 0.036481 |
| PRDX2    | 0.5822 | 1.7176 | 0.3486 | 0.9723 | 0.036488 |
| PRPF18   | 0.5836 | 1.7134 | 0.3501 | 0.9730 | 0.036552 |
| TAPT1    | 0.5792 | 1.7265 | 0.3450 | 0.9725 | 0.036553 |
| KCTD11   | 1.7075 | 0.5856 | 1.0281 | 2.8361 | 0.036559 |
| CLEC2B   | 0.5792 | 1.7267 | 0.3449 | 0.9724 | 0.036566 |
| RTP4     | 0.5858 | 1.7070 | 0.3528 | 0.9726 | 0.036569 |
| CPSF7    | 0.5837 | 1.7133 | 0.3501 | 0.9731 | 0.036592 |
| LTBR     | 1.7283 | 0.5786 | 1.0282 | 2.9051 | 0.036609 |
| KANK3    | 0.5794 | 1.7258 | 0.3451 | 0.9729 | 0.036614 |
| PSEN1    | 1.7555 | 0.5696 | 1.0282 | 2.9974 | 0.0367   |
| CCL22    | 0.5818 | 1.7187 | 0.3478 | 0.9732 | 0.036714 |
| FLNB     | 1.7149 | 0.5831 | 1.0279 | 2.8609 | 0.036753 |
| NDUFB6   | 0.5822 | 1.7176 | 0.3483 | 0.9732 | 0.036783 |
| GLB1L2   | 0.5830 | 1.7153 | 0.3492 | 0.9734 | 0.036802 |
| CDC7     | 0.5852 | 1.7089 | 0.3517 | 0.9737 | 0.036807 |
| VGLL3    | 1.7244 | 0.5799 | 1.0268 | 2.8959 | 0.036874 |
| STAT5A   | 0.5842 | 1.7118 | 0.3503 | 0.9740 | 0.036889 |
| PMCH     | 0.5819 | 1.7184 | 0.3478 | 0.9737 | 0.03693  |
| JOSD1    | 0.5864 | 1.7052 | 0.3532 | 0.9738 | 0.036947 |
| MPND     | 0.5844 | 1.7112 | 0.3505 | 0.9743 | 0.036979 |
| NDUFAF2  | 0.5788 | 1.7278 | 0.3441 | 0.9733 | 0.036992 |
| ZFHX3    | 1.7145 | 0.5833 | 1.0269 | 2.8623 | 0.037013 |
| PIPOX    | 0.5856 | 1.7076 | 0.3521 | 0.9739 | 0.037015 |
| TMEM40   | 0.5795 | 1.7255 | 0.3450 | 0.9735 | 0.037028 |
| BLCAP    | 0.5853 | 1.7085 | 0.3518 | 0.9737 | 0.03706  |
| RCL1     | 0.5826 | 1.7164 | 0.3486 | 0.9736 | 0.037073 |
| SIRT6    | 0.5822 | 1.7176 | 0.3479 | 0.9743 | 0.037137 |
| BCL6B    | 0.5820 | 1.7182 | 0.3477 | 0.9742 | 0.037171 |
| PTGFRN   | 1.7179 | 0.5821 | 1.0265 | 2.8749 | 0.037215 |
| HAP1     | 0.5832 | 1.7146 | 0.3490 | 0.9746 | 0.037321 |
| BOLA2    | 0.5805 | 1.7226 | 0.3456 | 0.9750 | 0.03734  |
| NAB1     | 1.7585 | 0.5687 | 1.0265 | 3.0123 | 0.037357 |

---

---

|           |        |        |        |        |          |
|-----------|--------|--------|--------|--------|----------|
| STX4      | 0.5835 | 1.7139 | 0.3491 | 0.9750 | 0.03738  |
| EIF3IP1   | 0.5841 | 1.7121 | 0.3499 | 0.9751 | 0.037432 |
| CCDC36    | 0.5747 | 1.7400 | 0.3387 | 0.9751 | 0.037455 |
| CNIH3     | 1.7222 | 0.5807 | 1.0253 | 2.8927 | 0.037464 |
| PADI2     | 0.5828 | 1.7157 | 0.3484 | 0.9752 | 0.037512 |
| TMEM87B   | 1.7312 | 0.5776 | 1.0256 | 2.9223 | 0.037522 |
| CLDND2    | 0.5834 | 1.7140 | 0.3491 | 0.9751 | 0.037599 |
| PAR6A     | 0.5835 | 1.7139 | 0.3489 | 0.9759 | 0.037621 |
| SNX6      | 1.7309 | 0.5777 | 1.0250 | 2.9229 | 0.037622 |
| ING3      | 0.5794 | 1.7258 | 0.3442 | 0.9753 | 0.037644 |
| FAM95B1   | 0.5837 | 1.7131 | 0.3491 | 0.9760 | 0.037686 |
| GPR21     | 0.5826 | 1.7164 | 0.3480 | 0.9753 | 0.037693 |
| SF3A2     | 0.5843 | 1.7116 | 0.3499 | 0.9756 | 0.037705 |
| ICOS      | 0.5863 | 1.7057 | 0.3522 | 0.9757 | 0.037717 |
| ZZEF1     | 0.5830 | 1.7152 | 0.3484 | 0.9757 | 0.03773  |
| LLGL2     | 0.5837 | 1.7131 | 0.3490 | 0.9764 | 0.037813 |
| CXCR7     | 1.7136 | 0.5836 | 1.0243 | 2.8670 | 0.037866 |
| PPFIA4    | 1.6990 | 0.5886 | 1.0245 | 2.8174 | 0.037892 |
| C17orf87  | 0.5871 | 1.7034 | 0.3530 | 0.9763 | 0.037897 |
| LOC284749 | 0.5777 | 1.7310 | 0.3419 | 0.9762 | 0.037905 |
| VEGFA     | 1.7077 | 0.5856 | 1.0240 | 2.8479 | 0.037909 |
| CDT1      | 0.5858 | 1.7071 | 0.3513 | 0.9767 | 0.037922 |
| KRT24     | 0.5826 | 1.7164 | 0.3478 | 0.9760 | 0.037961 |
| IL1B      | 1.7090 | 0.5852 | 1.0242 | 2.8516 | 0.038007 |
| FIGN      | 1.7072 | 0.5858 | 1.0238 | 2.8467 | 0.038014 |
| VAMP2     | 0.5789 | 1.7273 | 0.3432 | 0.9767 | 0.038044 |
| RNF222    | 0.5787 | 1.7281 | 0.3428 | 0.9769 | 0.038047 |
| GINS4     | 0.5833 | 1.7145 | 0.3484 | 0.9763 | 0.038058 |
| UPK3A     | 0.5837 | 1.7131 | 0.3488 | 0.9769 | 0.038167 |
| C17orf48  | 0.5840 | 1.7125 | 0.3490 | 0.9770 | 0.038179 |
| GABRP     | 0.5877 | 1.7015 | 0.3535 | 0.9772 | 0.038251 |
| LSS       | 1.7187 | 0.5818 | 1.0236 | 2.8857 | 0.038283 |
| ZDHHC8    | 1.7195 | 0.5816 | 1.0232 | 2.8898 | 0.038348 |
| GRIPAP1   | 0.5867 | 1.7044 | 0.3520 | 0.9780 | 0.03844  |
| GAPDH     | 1.7050 | 0.5865 | 1.0224 | 2.8431 | 0.038455 |
| ICAM2     | 0.5844 | 1.7111 | 0.3492 | 0.9781 | 0.038507 |
| ENTPD5    | 1.7365 | 0.5759 | 1.0229 | 2.9480 | 0.038508 |
| SNRPD3    | 0.5841 | 1.7121 | 0.3489 | 0.9779 | 0.038526 |
| EGFL6     | 0.5834 | 1.7140 | 0.3482 | 0.9776 | 0.03856  |
| GAL3ST1   | 1.7016 | 0.5877 | 1.0222 | 2.8325 | 0.038631 |
| NFRKB     | 0.5820 | 1.7183 | 0.3462 | 0.9784 | 0.038644 |
| ZNF12     | 1.7089 | 0.5852 | 1.0219 | 2.8577 | 0.03876  |
| PSMD9     | 0.5882 | 1.7002 | 0.3534 | 0.9788 | 0.038813 |
| TTBK1     | 0.5888 | 1.6985 | 0.3542 | 0.9788 | 0.038831 |

---

---

|           |        |        |        |        |          |
|-----------|--------|--------|--------|--------|----------|
| MRPS11    | 0.5879 | 1.7009 | 0.3530 | 0.9791 | 0.038875 |
| ELM01     | 0.5871 | 1.7032 | 0.3522 | 0.9789 | 0.038888 |
| HIST1H2BJ | 0.5870 | 1.7034 | 0.3522 | 0.9786 | 0.038891 |
| PTCRA     | 0.5888 | 1.6984 | 0.3541 | 0.9789 | 0.038897 |
| CFP       | 0.5853 | 1.7087 | 0.3499 | 0.9791 | 0.038901 |
| CPNE7     | 0.5879 | 1.7011 | 0.3529 | 0.9793 | 0.038904 |
| MYO3B     | 1.7029 | 0.5872 | 1.0214 | 2.8393 | 0.038907 |
| TRIM26    | 0.5891 | 1.6976 | 0.3545 | 0.9790 | 0.038911 |
| ZNF575    | 0.5853 | 1.7086 | 0.3499 | 0.9790 | 0.038929 |
| PLCD1     | 0.5812 | 1.7206 | 0.3451 | 0.9788 | 0.038934 |
| CCDC59    | 0.5874 | 1.7024 | 0.3524 | 0.9792 | 0.039046 |
| C20orf203 | 0.5877 | 1.7016 | 0.3528 | 0.9790 | 0.039056 |
| PAPPA     | 1.7024 | 0.5874 | 1.0206 | 2.8395 | 0.039135 |
| LILRB1    | 0.5878 | 1.7014 | 0.3527 | 0.9796 | 0.039137 |
| LATS1     | 1.7116 | 0.5842 | 1.0210 | 2.8693 | 0.039154 |
| BBS2      | 1.7024 | 0.5874 | 1.0208 | 2.8392 | 0.039174 |
| FAM122C   | 0.5906 | 1.6931 | 0.3561 | 0.9797 | 0.039214 |
| LRRC37A4  | 0.5879 | 1.7010 | 0.3527 | 0.9800 | 0.039281 |
| GIMAP4    | 0.5894 | 1.6967 | 0.3544 | 0.9800 | 0.039328 |
| ELAVL1    | 0.5861 | 1.7061 | 0.3506 | 0.9799 | 0.039348 |
| INSL3     | 0.5878 | 1.7012 | 0.3526 | 0.9801 | 0.03935  |
| TACC2     | 0.5855 | 1.7078 | 0.3498 | 0.9801 | 0.039392 |
| ACAD8     | 0.5805 | 1.7227 | 0.3438 | 0.9802 | 0.039439 |
| ZNF700    | 0.5877 | 1.7016 | 0.3522 | 0.9806 | 0.039448 |
| CD40LG    | 0.5895 | 1.6964 | 0.3544 | 0.9804 | 0.03947  |
| PTHLH     | 1.7074 | 0.5857 | 1.0197 | 2.8589 | 0.039567 |
| SPATA2    | 0.5882 | 1.7001 | 0.3527 | 0.9808 | 0.039571 |
| GFPT2     | 1.6957 | 0.5897 | 1.0194 | 2.8207 | 0.03967  |
| CSF1      | 1.7192 | 0.5817 | 1.0191 | 2.9005 | 0.039768 |
| ZFR2      | 0.5898 | 1.6956 | 0.3543 | 0.9818 | 0.039845 |
| FOXD4     | 0.5864 | 1.7054 | 0.3503 | 0.9815 | 0.039902 |
| NRGN      | 0.5848 | 1.7101 | 0.3484 | 0.9816 | 0.039937 |
| GZMK      | 0.5889 | 1.6981 | 0.3532 | 0.9819 | 0.039988 |
| C7orf49   | 1.6976 | 0.5891 | 1.0189 | 2.8283 | 0.040042 |
| RLTPR     | 0.5890 | 1.6978 | 0.3533 | 0.9819 | 0.040054 |
| MYH3      | 0.5898 | 1.6956 | 0.3541 | 0.9823 | 0.040105 |
| RNPS1     | 0.5872 | 1.7029 | 0.3511 | 0.9822 | 0.04012  |
| TNNI2     | 0.5882 | 1.7001 | 0.3523 | 0.9820 | 0.040187 |
| IL12A     | 0.5894 | 1.6967 | 0.3536 | 0.9823 | 0.040206 |
| RGPD3     | 1.6987 | 0.5887 | 1.0180 | 2.8346 | 0.040244 |
| SIGLEC10  | 0.5910 | 1.6920 | 0.3555 | 0.9825 | 0.040264 |
| ABCC4     | 0.5897 | 1.6957 | 0.3541 | 0.9821 | 0.040277 |
| SEC31B    | 0.5893 | 1.6971 | 0.3534 | 0.9826 | 0.040291 |
| HOXA6     | 1.7136 | 0.5836 | 1.0180 | 2.8846 | 0.040303 |

---



---

|            |        |        |        |        |          |
|------------|--------|--------|--------|--------|----------|
| SNRNP25    | 0.5858 | 1.7071 | 0.3492 | 0.9826 | 0.040396 |
| RPL7       | 1.6927 | 0.5908 | 1.0174 | 2.8162 | 0.040405 |
| CATSPER2P1 | 1.6992 | 0.5885 | 1.0170 | 2.8391 | 0.04042  |
| HDAC10     | 0.5915 | 1.6906 | 0.3558 | 0.9834 | 0.040585 |
| ATP1A4     | 0.5915 | 1.6906 | 0.3557 | 0.9836 | 0.0406   |
| RPL26      | 0.5868 | 1.7041 | 0.3502 | 0.9834 | 0.040669 |
| SLC12A3    | 0.5911 | 1.6917 | 0.3553 | 0.9836 | 0.04072  |
| CYSLTR1    | 0.5902 | 1.6944 | 0.3540 | 0.9839 | 0.040722 |
| CCR6       | 0.5905 | 1.6936 | 0.3543 | 0.9840 | 0.040816 |
| AP1B1      | 0.5905 | 1.6933 | 0.3543 | 0.9843 | 0.040847 |
| GSDMB      | 0.5902 | 1.6943 | 0.3540 | 0.9841 | 0.040918 |
| ZNF44      | 0.5866 | 1.7048 | 0.3498 | 0.9837 | 0.040947 |
| TNFAIP8L2  | 0.5908 | 1.6926 | 0.3545 | 0.9847 | 0.041024 |
| NXF1       | 0.5901 | 1.6946 | 0.3538 | 0.9843 | 0.041024 |
| ANKRD32    | 0.5886 | 1.6991 | 0.3520 | 0.9841 | 0.041028 |
| C15orf59   | 1.6936 | 0.5905 | 1.0155 | 2.8243 | 0.041042 |
| 3-Mar      | 0.5906 | 1.6933 | 0.3540 | 0.9851 | 0.041194 |
| FAM21B     | 0.5906 | 1.6933 | 0.3539 | 0.9854 | 0.041281 |
| CSNK1A1P   | 0.5917 | 1.6902 | 0.3554 | 0.9849 | 0.041284 |
| TFRC       | 1.7137 | 0.5835 | 1.0149 | 2.8934 | 0.041293 |
| SLC4A11    | 0.5885 | 1.6991 | 0.3516 | 0.9852 | 0.041354 |
| ZFP92      | 1.7053 | 0.5864 | 1.0146 | 2.8659 | 0.041385 |
| LY75       | 0.5944 | 1.6825 | 0.3585 | 0.9854 | 0.041385 |
| FAM81A     | 0.5908 | 1.6925 | 0.3542 | 0.9855 | 0.041491 |
| UNC50      | 1.7038 | 0.5869 | 1.0147 | 2.8609 | 0.041518 |
| RNF166     | 0.5857 | 1.7073 | 0.3481 | 0.9857 | 0.041538 |
| GTPBP8     | 0.5937 | 1.6844 | 0.3576 | 0.9856 | 0.041542 |
| CD226      | 0.5924 | 1.6880 | 0.3561 | 0.9856 | 0.041563 |
| ICOSLG     | 0.5888 | 1.6984 | 0.3515 | 0.9863 | 0.041594 |
| ATP5S      | 0.5923 | 1.6882 | 0.3559 | 0.9859 | 0.041636 |
| ASAM       | 1.6967 | 0.5894 | 1.0142 | 2.8387 | 0.041689 |
| PARL       | 0.5915 | 1.6905 | 0.3549 | 0.9859 | 0.041693 |
| EDF1       | 0.5843 | 1.7113 | 0.3462 | 0.9862 | 0.041745 |
| TMPO       | 0.5929 | 1.6866 | 0.3565 | 0.9862 | 0.041758 |
| MFSD4      | 0.5910 | 1.6921 | 0.3542 | 0.9860 | 0.041821 |
| FOXF1      | 0.5873 | 1.7027 | 0.3496 | 0.9865 | 0.04183  |
| ZRANB2     | 0.5866 | 1.7048 | 0.3488 | 0.9864 | 0.041874 |
| PVRIG      | 0.5935 | 1.6850 | 0.3569 | 0.9869 | 0.041876 |
| RSAD1      | 0.5901 | 1.6947 | 0.3528 | 0.9869 | 0.041883 |
| PRIM1      | 0.5920 | 1.6891 | 0.3552 | 0.9869 | 0.041887 |
| SARM1      | 0.5919 | 1.6895 | 0.3551 | 0.9866 | 0.041921 |
| FAM100B    | 0.5920 | 1.6891 | 0.3551 | 0.9870 | 0.042009 |
| TMEM149    | 0.5940 | 1.6836 | 0.3574 | 0.9873 | 0.042069 |
| C8orf80    | 0.5922 | 1.6886 | 0.3552 | 0.9875 | 0.042159 |

---

---

|              |        |        |        |        |          |
|--------------|--------|--------|--------|--------|----------|
| TUBB2C       | 0.5813 | 1.7202 | 0.3421 | 0.9877 | 0.04225  |
| WISP3        | 1.6874 | 0.5926 | 1.0123 | 2.8127 | 0.042302 |
| FBX04        | 0.5899 | 1.6951 | 0.3524 | 0.9874 | 0.042345 |
| FCRL3        | 0.5942 | 1.6829 | 0.3573 | 0.9882 | 0.042389 |
| HAUS1        | 0.5907 | 1.6930 | 0.3531 | 0.9880 | 0.042406 |
| PAR6G        | 0.5882 | 1.7000 | 0.3503 | 0.9877 | 0.042452 |
| LOC100271722 | 0.5880 | 1.7008 | 0.3500 | 0.9877 | 0.042487 |
| RFC4         | 0.5936 | 1.6847 | 0.3566 | 0.9879 | 0.04254  |
| SERPINF2     | 0.5887 | 1.6988 | 0.3506 | 0.9882 | 0.042553 |
| LOC100130932 | 0.5914 | 1.6908 | 0.3540 | 0.9880 | 0.042554 |
| PICK1        | 0.5928 | 1.6870 | 0.3554 | 0.9888 | 0.042577 |
| C5orf35      | 0.5922 | 1.6885 | 0.3550 | 0.9879 | 0.04261  |
| KBTBD2       | 1.6923 | 0.5909 | 1.0115 | 2.8312 | 0.042725 |
| FNDC3A       | 1.6939 | 0.5904 | 1.0110 | 2.8381 | 0.042731 |
| POLI         | 1.6809 | 0.5949 | 1.0110 | 2.7946 | 0.042812 |
| CLTCL1       | 1.6818 | 0.5946 | 1.0112 | 2.7971 | 0.042909 |
| GLRB         | 1.6866 | 0.5929 | 1.0111 | 2.8132 | 0.042919 |
| PA2G4P4      | 0.5944 | 1.6825 | 0.3574 | 0.9886 | 0.042923 |
| PSMG2        | 0.5884 | 1.6997 | 0.3500 | 0.9890 | 0.04294  |
| ESRRB        | 0.5916 | 1.6903 | 0.3538 | 0.9892 | 0.042952 |
| SLC25A33     | 0.5939 | 1.6837 | 0.3565 | 0.9896 | 0.042973 |
| CPNE5        | 0.5934 | 1.6852 | 0.3558 | 0.9895 | 0.042993 |
| IL18RAP      | 0.5938 | 1.6841 | 0.3562 | 0.9899 | 0.043061 |
| SFXN2        | 0.5948 | 1.6812 | 0.3575 | 0.9897 | 0.043067 |
| NMNAT2       | 1.6917 | 0.5911 | 1.0105 | 2.8320 | 0.04307  |
| LOC147727    | 0.5912 | 1.6913 | 0.3533 | 0.9896 | 0.043077 |
| MCM6         | 0.5951 | 1.6804 | 0.3579 | 0.9896 | 0.043096 |
| ERCC5        | 0.5934 | 1.6852 | 0.3559 | 0.9893 | 0.043106 |
| PFKFB4       | 1.6774 | 0.5962 | 1.0104 | 2.7847 | 0.043177 |
| TMEM86A      | 0.5918 | 1.6897 | 0.3537 | 0.9902 | 0.043179 |
| HCK          | 0.5956 | 1.6791 | 0.3583 | 0.9899 | 0.043231 |
| CCND2        | 0.5943 | 1.6826 | 0.3567 | 0.9903 | 0.043342 |
| ACAT2        | 1.6888 | 0.5921 | 1.0099 | 2.8241 | 0.043398 |
| PTPRCAP      | 0.5941 | 1.6832 | 0.3564 | 0.9905 | 0.0434   |
| RALGDS       | 0.5943 | 1.6826 | 0.3567 | 0.9903 | 0.043456 |
| SIGLEC8      | 0.5973 | 1.6742 | 0.3601 | 0.9907 | 0.043483 |
| LOC284100    | 0.5923 | 1.6883 | 0.3541 | 0.9908 | 0.043492 |
| ZGLP1        | 0.5870 | 1.7034 | 0.3479 | 0.9905 | 0.043521 |
| SSR4         | 0.5925 | 1.6876 | 0.3543 | 0.9911 | 0.04362  |
| EXD1         | 0.5937 | 1.6844 | 0.3558 | 0.9906 | 0.043724 |
| 4-Mar        | 1.6778 | 0.5960 | 1.0086 | 2.7909 | 0.043822 |
| TP53         | 0.5915 | 1.6906 | 0.3529 | 0.9913 | 0.043823 |
| KIAA1522     | 0.5947 | 1.6814 | 0.3567 | 0.9917 | 0.043872 |
| HAAO         | 0.5928 | 1.6869 | 0.3545 | 0.9913 | 0.043909 |

---

---

|          |        |        |        |        |          |
|----------|--------|--------|--------|--------|----------|
| BICD1    | 1.6942 | 0.5903 | 1.0083 | 2.8466 | 0.044031 |
| IFT122   | 0.5929 | 1.6867 | 0.3542 | 0.9922 | 0.044054 |
| ADAMTS8  | 0.5976 | 1.6735 | 0.3601 | 0.9915 | 0.044061 |
| GNA12    | 1.6896 | 0.5919 | 1.0083 | 2.8312 | 0.044064 |
| TRAT1    | 0.5948 | 1.6811 | 0.3567 | 0.9918 | 0.044085 |
| PKM2     | 1.6831 | 0.5941 | 1.0080 | 2.8105 | 0.044098 |
| CEND1    | 0.5908 | 1.6926 | 0.3519 | 0.9919 | 0.044104 |
| NCF1     | 0.5975 | 1.6736 | 0.3599 | 0.9921 | 0.044127 |
| NDUFS4   | 0.5929 | 1.6866 | 0.3544 | 0.9921 | 0.044159 |
| SLC10A3  | 0.5966 | 1.6762 | 0.3587 | 0.9923 | 0.044175 |
| REL      | 1.7011 | 0.5879 | 1.0077 | 2.8715 | 0.044219 |
| C1orf204 | 0.5930 | 1.6864 | 0.3544 | 0.9922 | 0.044228 |
| POLR2J3  | 0.5933 | 1.6854 | 0.3547 | 0.9925 | 0.044269 |
| SESN3    | 1.6790 | 0.5956 | 1.0069 | 2.7995 | 0.044346 |
| CAV2     | 1.6912 | 0.5913 | 1.0070 | 2.8404 | 0.044375 |
| AIDA     | 1.6726 | 0.5979 | 1.0076 | 2.7765 | 0.044376 |
| CAP2     | 1.6757 | 0.5968 | 1.0073 | 2.7877 | 0.044448 |
| C10orf46 | 0.5977 | 1.6729 | 0.3597 | 0.9932 | 0.044532 |
| NAP1L5   | 0.5951 | 1.6803 | 0.3566 | 0.9931 | 0.044564 |
| WBP4     | 1.6945 | 0.5901 | 1.0068 | 2.8521 | 0.044576 |
| MATN3    | 1.6848 | 0.5935 | 1.0067 | 2.8198 | 0.04458  |
| DDX21    | 1.6909 | 0.5914 | 1.0068 | 2.8399 | 0.044626 |
| PWWP2B   | 1.6792 | 0.5955 | 1.0069 | 2.8005 | 0.04463  |
| RHOQ     | 1.6907 | 0.5915 | 1.0064 | 2.8402 | 0.044656 |
| GRRP1    | 0.5974 | 1.6738 | 0.3593 | 0.9934 | 0.044683 |
| BNIP3    | 1.6775 | 0.5961 | 1.0065 | 2.7956 | 0.044793 |
| DTX3L    | 0.5979 | 1.6724 | 0.3598 | 0.9936 | 0.044859 |
| AMMECR1L | 1.7090 | 0.5852 | 1.0061 | 2.9029 | 0.044888 |
| AVPR2    | 0.5977 | 1.6732 | 0.3593 | 0.9940 | 0.044894 |
| TBC1D24  | 1.6830 | 0.5942 | 1.0061 | 2.8152 | 0.04493  |
| SGCB     | 1.6732 | 0.5977 | 1.0058 | 2.7832 | 0.045106 |
| PPP4R1   | 1.6786 | 0.5957 | 1.0059 | 2.8011 | 0.045146 |
| TYROBP   | 0.5983 | 1.6714 | 0.3599 | 0.9947 | 0.045194 |
| OVCA2    | 0.5937 | 1.6843 | 0.3544 | 0.9947 | 0.045273 |
| EDEM3    | 1.6893 | 0.5920 | 1.0052 | 2.8390 | 0.045305 |
| TMC01    | 1.6753 | 0.5969 | 1.0055 | 2.7913 | 0.045349 |
| DSCR9    | 0.5958 | 1.6783 | 0.3568 | 0.9949 | 0.045356 |
| C12orf36 | 0.5962 | 1.6774 | 0.3572 | 0.9949 | 0.045404 |
| PON1     | 1.7005 | 0.5880 | 1.0053 | 2.8765 | 0.045407 |
| STAG2    | 0.5979 | 1.6725 | 0.3592 | 0.9953 | 0.045459 |
| ZNF304   | 1.6705 | 0.5986 | 1.0047 | 2.7776 | 0.04546  |
| SMN2     | 0.5943 | 1.6827 | 0.3550 | 0.9950 | 0.04547  |
| CD8B     | 0.5947 | 1.6815 | 0.3555 | 0.9948 | 0.045471 |
| MBNL1    | 0.5971 | 1.6748 | 0.3583 | 0.9951 | 0.045609 |

---

---

|           |        |        |        |        |          |
|-----------|--------|--------|--------|--------|----------|
| PTPLAD2   | 1.7031 | 0.5872 | 1.0041 | 2.8889 | 0.045612 |
| SLC7A1    | 1.6806 | 0.5950 | 1.0042 | 2.8127 | 0.045616 |
| TERF2IP   | 0.5973 | 1.6741 | 0.3585 | 0.9954 | 0.045648 |
| GLYATL2   | 0.5984 | 1.6710 | 0.3598 | 0.9953 | 0.045669 |
| C19orf10  | 1.6775 | 0.5961 | 1.0042 | 2.8025 | 0.045748 |
| KIRREL    | 1.6757 | 0.5968 | 1.0043 | 2.7958 | 0.045751 |
| LRFN3     | 1.6867 | 0.5929 | 1.0044 | 2.8327 | 0.045767 |
| RFPL1S    | 0.5985 | 1.6708 | 0.3597 | 0.9958 | 0.045792 |
| CRB1      | 1.6760 | 0.5966 | 1.0040 | 2.7979 | 0.045812 |
| FA2H      | 0.5928 | 1.6869 | 0.3527 | 0.9963 | 0.045878 |
| NKX2-5    | 1.6860 | 0.5931 | 1.0040 | 2.8310 | 0.045919 |
| CA5B      | 0.5995 | 1.6682 | 0.3607 | 0.9963 | 0.045926 |
| SLC24A3   | 1.6741 | 0.5974 | 1.0037 | 2.7922 | 0.045943 |
| SEMA3C    | 1.6774 | 0.5962 | 1.0034 | 2.8042 | 0.045945 |
| BCL2L14   | 0.5990 | 1.6694 | 0.3603 | 0.9958 | 0.045951 |
| EIF2A     | 0.5954 | 1.6796 | 0.3559 | 0.9960 | 0.045953 |
| ANXA2P2   | 1.6745 | 0.5972 | 1.0032 | 2.7951 | 0.045957 |
| SETDB2    | 0.5948 | 1.6812 | 0.3553 | 0.9959 | 0.045971 |
| FSTL3     | 1.6783 | 0.5958 | 1.0032 | 2.8079 | 0.045975 |
| LST1      | 0.5982 | 1.6716 | 0.3590 | 0.9967 | 0.046028 |
| TNFRSF1B  | 0.5975 | 1.6735 | 0.3582 | 0.9968 | 0.046231 |
| RHOT1     | 1.6833 | 0.5941 | 1.0026 | 2.8262 | 0.046255 |
| OSR2      | 0.5989 | 1.6697 | 0.3597 | 0.9973 | 0.046385 |
| FKBP14    | 1.6996 | 0.5884 | 1.0019 | 2.8830 | 0.046457 |
| RHOB      | 1.6732 | 0.5977 | 1.0025 | 2.7927 | 0.046458 |
| CYBB      | 0.5999 | 1.6669 | 0.3609 | 0.9973 | 0.046464 |
| CSF2RB    | 0.5959 | 1.6781 | 0.3559 | 0.9979 | 0.046523 |
| RPP40     | 0.5987 | 1.6702 | 0.3595 | 0.9972 | 0.046525 |
| ICAM4     | 0.5995 | 1.6679 | 0.3603 | 0.9976 | 0.046528 |
| C19orf54  | 0.5986 | 1.6706 | 0.3591 | 0.9977 | 0.046537 |
| CLK2      | 1.6717 | 0.5982 | 1.0027 | 2.7870 | 0.04655  |
| C5orf33   | 0.5988 | 1.6700 | 0.3593 | 0.9981 | 0.046606 |
| RBM8A     | 0.5995 | 1.6680 | 0.3603 | 0.9974 | 0.046654 |
| PPP1R3D   | 0.6012 | 1.6634 | 0.3621 | 0.9981 | 0.046674 |
| REEP1     | 0.5989 | 1.6697 | 0.3594 | 0.9980 | 0.046699 |
| TOPBP1    | 0.6016 | 1.6621 | 0.3626 | 0.9982 | 0.04672  |
| HCLS1     | 0.5989 | 1.6698 | 0.3592 | 0.9984 | 0.04675  |
| FPR1      | 0.5970 | 1.6751 | 0.3569 | 0.9986 | 0.046833 |
| LOC729375 | 0.5990 | 1.6694 | 0.3593 | 0.9985 | 0.046867 |
| TRPV2     | 0.5993 | 1.6686 | 0.3597 | 0.9986 | 0.046899 |
| GZF1      | 1.6754 | 0.5969 | 1.0015 | 2.8028 | 0.046906 |
| ASPG      | 0.6005 | 1.6653 | 0.3610 | 0.9988 | 0.04692  |
| HEY2      | 0.5984 | 1.6711 | 0.3586 | 0.9985 | 0.046934 |
| C22orf25  | 0.5992 | 1.6689 | 0.3595 | 0.9987 | 0.04698  |

---

---

|           |        |        |        |        |          |
|-----------|--------|--------|--------|--------|----------|
| ZP1       | 1.6807 | 0.5950 | 1.0010 | 2.8219 | 0.047017 |
| ZMAT2     | 0.6001 | 1.6664 | 0.3606 | 0.9985 | 0.04703  |
| HBS1L     | 1.6881 | 0.5924 | 1.0006 | 2.8478 | 0.047045 |
| CECR1     | 0.6006 | 1.6649 | 0.3612 | 0.9987 | 0.047097 |
| PLEC      | 1.6709 | 0.5985 | 1.0010 | 2.7891 | 0.047185 |
| GNPAT     | 1.6645 | 0.6008 | 1.0010 | 2.7678 | 0.047188 |
| CLEC12A   | 0.5998 | 1.6671 | 0.3600 | 0.9995 | 0.047247 |
| TMEM184C  | 1.6964 | 0.5895 | 0.9997 | 2.8787 | 0.047257 |
| ERO1L     | 1.6738 | 0.5975 | 1.0007 | 2.7996 | 0.047272 |
| GNGT1     | 1.6797 | 0.5954 | 1.0004 | 2.8201 | 0.04733  |
| ECHDC2    | 0.5956 | 1.6788 | 0.3547 | 1.0003 | 0.047394 |
| ELOVL3    | 1.6744 | 0.5972 | 1.0004 | 2.8026 | 0.047396 |
| PSMA3     | 0.5997 | 1.6675 | 0.3598 | 0.9995 | 0.047398 |
| RCSL1     | 0.5994 | 1.6684 | 0.3594 | 0.9996 | 0.047413 |
| C1orf182  | 1.6732 | 0.5977 | 1.0003 | 2.7988 | 0.04745  |
| ATP2B2    | 0.5991 | 1.6691 | 0.3590 | 0.9998 | 0.047525 |
| CACNA1A   | 0.5982 | 1.6716 | 0.3578 | 1.0002 | 0.047621 |
| HSH2D     | 0.5977 | 1.6732 | 0.3571 | 1.0002 | 0.04769  |
| IL9R      | 0.5981 | 1.6719 | 0.3576 | 1.0003 | 0.047696 |
| HIST1H2BK | 0.5999 | 1.6668 | 0.3598 | 1.0004 | 0.047726 |
| FGR       | 0.5981 | 1.6720 | 0.3578 | 0.9998 | 0.047738 |
| APBB1IP   | 0.6002 | 1.6662 | 0.3601 | 1.0003 | 0.047745 |
| TSC22D3   | 0.6017 | 1.6618 | 0.3621 | 1.0000 | 0.047751 |
| MPEG1     | 0.6002 | 1.6660 | 0.3601 | 1.0005 | 0.047767 |
| AADACL2   | 0.5983 | 1.6713 | 0.3578 | 1.0007 | 0.047808 |
| MORN1     | 0.5927 | 1.6872 | 0.3511 | 1.0005 | 0.047814 |
| SUMO2     | 0.6011 | 1.6637 | 0.3610 | 1.0007 | 0.047916 |
| BNIP1     | 0.6005 | 1.6652 | 0.3602 | 1.0012 | 0.047936 |
| ADAL      | 0.5981 | 1.6718 | 0.3576 | 1.0005 | 0.047944 |
| FAM182A   | 0.6007 | 1.6647 | 0.3604 | 1.0012 | 0.047985 |
| MDH1      | 0.5962 | 1.6774 | 0.3550 | 1.0011 | 0.048006 |
| SLAMF8    | 0.6026 | 1.6596 | 0.3628 | 1.0007 | 0.04801  |
| LASS2     | 1.6679 | 0.5996 | 0.9990 | 2.7846 | 0.048135 |
| GPRC5A    | 1.6656 | 0.6004 | 0.9983 | 2.7790 | 0.048178 |
| CLIC5     | 0.6016 | 1.6624 | 0.3615 | 1.0010 | 0.048251 |
| TXNIP     | 0.5999 | 1.6671 | 0.3593 | 1.0014 | 0.048274 |
| GIMAP1    | 0.6024 | 1.6601 | 0.3623 | 1.0015 | 0.048299 |
| CRAT      | 0.6018 | 1.6617 | 0.3616 | 1.0016 | 0.04831  |
| FZD3      | 1.6724 | 0.5979 | 0.9986 | 2.8007 | 0.048311 |
| PCDHB6    | 1.6707 | 0.5986 | 0.9983 | 2.7959 | 0.048317 |
| VWA3B     | 0.6026 | 1.6596 | 0.3626 | 1.0014 | 0.048398 |
| HIST1H2BG | 0.5973 | 1.6741 | 0.3561 | 1.0019 | 0.048461 |
| FRAT1     | 0.6000 | 1.6667 | 0.3592 | 1.0023 | 0.048462 |
| VCL       | 1.6825 | 0.5944 | 0.9971 | 2.8389 | 0.048463 |

---

---

|           |        |        |        |        |          |
|-----------|--------|--------|--------|--------|----------|
| JAK2      | 0.6024 | 1.6599 | 0.3621 | 1.0022 | 0.048483 |
| ONECUT2   | 0.6006 | 1.6650 | 0.3600 | 1.0021 | 0.048555 |
| LRP11     | 1.6738 | 0.5974 | 0.9969 | 2.8103 | 0.048585 |
| CBFB      | 0.6002 | 1.6661 | 0.3594 | 1.0025 | 0.048611 |
| MGC12916  | 0.6043 | 1.6548 | 0.3645 | 1.0020 | 0.048627 |
| KREMEN1   | 0.6015 | 1.6626 | 0.3609 | 1.0025 | 0.048636 |
| CDC27     | 1.6602 | 0.6023 | 0.9978 | 2.7625 | 0.048668 |
| STMN1     | 0.5996 | 1.6677 | 0.3585 | 1.0028 | 0.048731 |
| LOC401588 | 0.5994 | 1.6683 | 0.3584 | 1.0027 | 0.048815 |
| ZNF391    | 1.6818 | 0.5946 | 0.9966 | 2.8381 | 0.048832 |
| LOC728554 | 0.5981 | 1.6719 | 0.3566 | 1.0032 | 0.048866 |
| KCNT2     | 1.6816 | 0.5947 | 0.9967 | 2.8373 | 0.048922 |
| CCDC46    | 1.6626 | 0.6015 | 0.9967 | 2.7733 | 0.049    |
| ADRB1     | 0.6032 | 1.6577 | 0.3628 | 1.0029 | 0.049024 |
| S100Z     | 0.6009 | 1.6641 | 0.3601 | 1.0028 | 0.049071 |
| C22orf34  | 0.6024 | 1.6601 | 0.3616 | 1.0035 | 0.049158 |
| PGM2      | 1.6684 | 0.5994 | 0.9964 | 2.7937 | 0.049172 |
| NICN1     | 0.6001 | 1.6665 | 0.3587 | 1.0037 | 0.04921  |
| AES       | 0.6018 | 1.6616 | 0.3609 | 1.0037 | 0.049215 |
| RPS6KB2   | 0.5989 | 1.6697 | 0.3574 | 1.0036 | 0.049278 |
| GPC6      | 1.6723 | 0.5980 | 0.9955 | 2.8093 | 0.049385 |
| CCDC144B  | 1.6662 | 0.6002 | 0.9958 | 2.7879 | 0.049459 |
| PDK3      | 0.6027 | 1.6592 | 0.3618 | 1.0040 | 0.04946  |
| SIAE      | 1.6654 | 0.6004 | 0.9954 | 2.7866 | 0.049491 |
| PCGF6     | 0.6021 | 1.6608 | 0.3610 | 1.0044 | 0.049514 |
| ELOF1     | 0.6020 | 1.6611 | 0.3608 | 1.0044 | 0.049548 |
| GTF2F1    | 0.6027 | 1.6591 | 0.3617 | 1.0044 | 0.049567 |
| TBX21     | 0.6029 | 1.6586 | 0.3618 | 1.0048 | 0.049629 |
| OST4      | 1.6603 | 0.6023 | 0.9955 | 2.7690 | 0.049751 |
| CT62      | 1.6708 | 0.5985 | 0.9948 | 2.8060 | 0.049769 |
| UBE2D2    | 0.5959 | 1.6782 | 0.3532 | 1.0053 | 0.049799 |
| PTTG1IP   | 1.6580 | 0.6032 | 0.9948 | 2.7631 | 0.049805 |
| HCN3      | 0.6041 | 1.6554 | 0.3631 | 1.0051 | 0.049821 |
| SOD1      | 0.5991 | 1.6693 | 0.3570 | 1.0051 | 0.049905 |
| COMMD4    | 0.6012 | 1.6633 | 0.3594 | 1.0056 | 0.049936 |

---

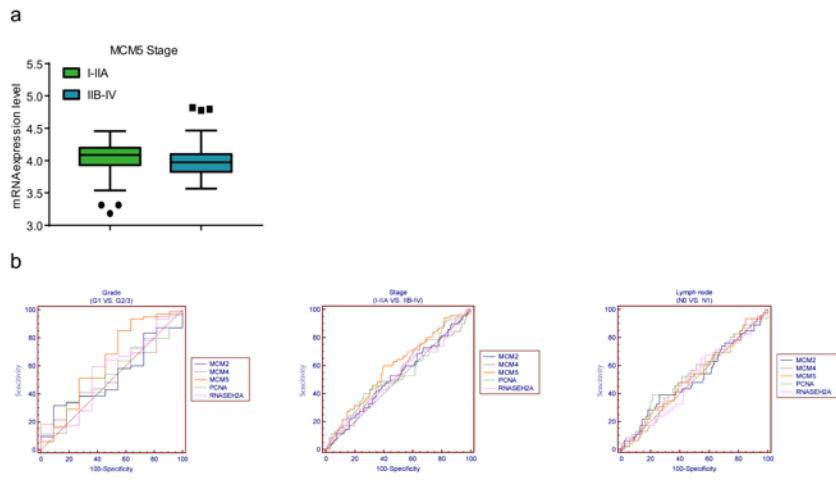

Figure S 1

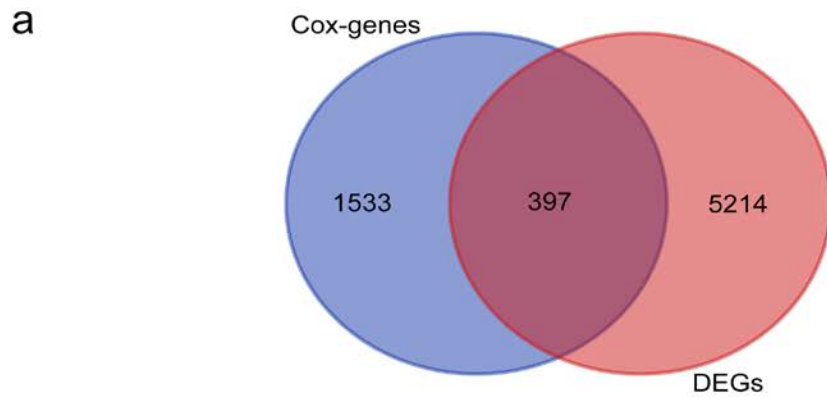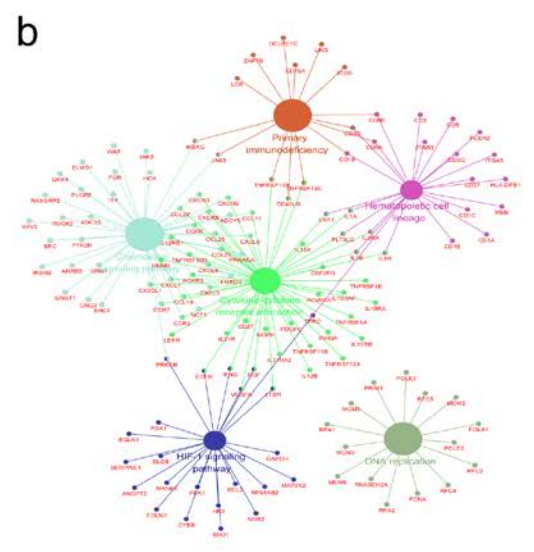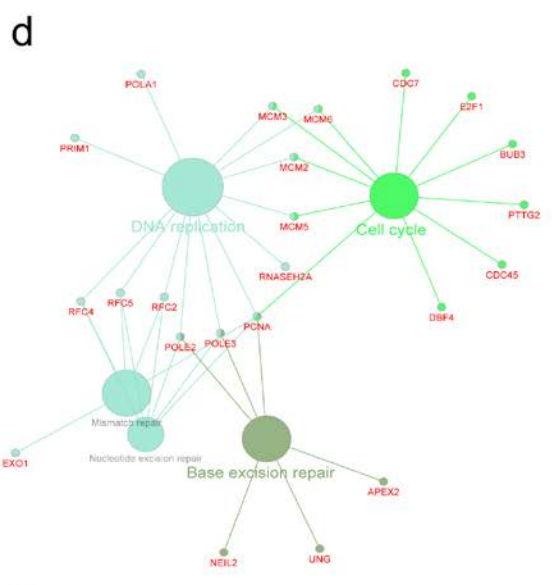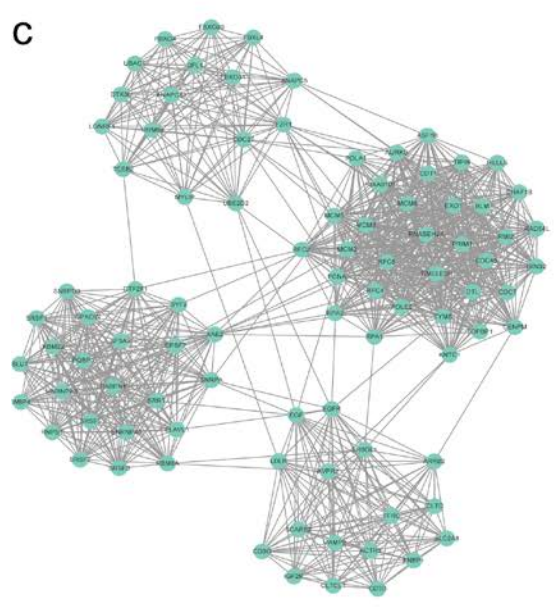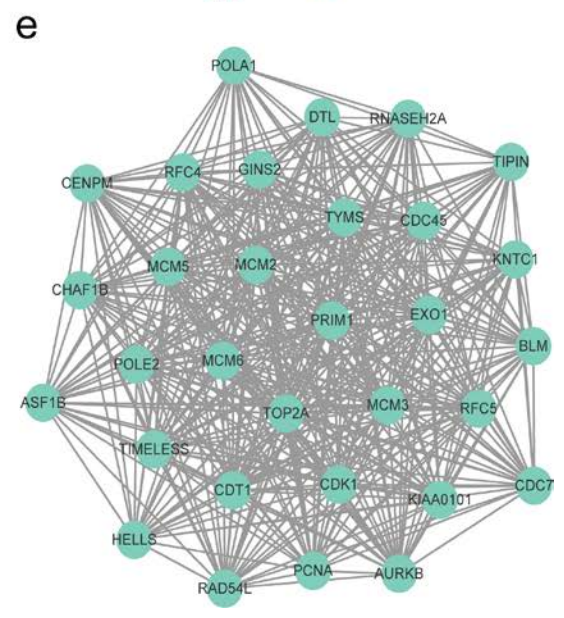

Supplement: Supplementary_material.pdf [file Supplementary_material.pdf]
